# Supplementary material for: Examining the reliability and validity of a modified version of the International Physical Activity Questionnaire, long form (IPAQ-LF) in Nigeria: a cross-sectional study
Source: PubMed Central journal article supplement — BMJ Open. 2014 Dec 1;4(12):e005820. doi: 10.1136/bmjopen-2014-005820 (PMC4256540; doi:10.1136/bmjopen-2014-005820), 2014-12-01

# BMJ Open

## Examining the reliability and validity of a modified version of the International Physical Activity Questionnaire, long form (IPAQ-L) in Nigeria

|                                 |                                                                                                                                                                                                                                                                                                                                                                          |
|---------------------------------|--------------------------------------------------------------------------------------------------------------------------------------------------------------------------------------------------------------------------------------------------------------------------------------------------------------------------------------------------------------------------|
| Journal:                        | <i>BMJ Open</i>                                                                                                                                                                                                                                                                                                                                                          |
| Manuscript ID:                  | bmjopen-2014-005820                                                                                                                                                                                                                                                                                                                                                      |
| Article Type:                   | Research                                                                                                                                                                                                                                                                                                                                                                 |
| Date Submitted by the Author:   | 29-May-2014                                                                                                                                                                                                                                                                                                                                                              |
| Complete List of Authors:       | Oyeyemi, Adewale; University of Maiduguri, Physiotherapy<br>Bello, Umar; University of Maiduguri, Physiotherapy<br>Philemon, Saratu; Jos University Teaching Hospital, Physiotherapy<br>Aliyu, Habibu; University of Maiduguri, Physiotherapy<br>Majidadi, Rebecca; University of Maiduguri, Physiotherapy<br>Oyeyemi, Adetoyeje; University of Maiduguri, Physiotherapy |
| <b>Primary Subject Heading</b>: | Public health                                                                                                                                                                                                                                                                                                                                                            |
| Secondary Subject Heading:      | Epidemiology, Sports and exercise medicine                                                                                                                                                                                                                                                                                                                               |
| Keywords:                       | PUBLIC HEALTH, SOCIAL MEDICINE, EPIDEMIOLOGY                                                                                                                                                                                                                                                                                                                             |
|                                 |                                                                                                                                                                                                                                                                                                                                                                          |

SCHOLARONE™  
Manuscripts

1  
2  
3 1 **Examining the reliability and validity of a modified version of the International Physical**  
4 **Activity Questionnaire, long form (IPAQ-L) in Nigeria**  
5  
6  
7 3

8  
9 4 Adewale L. Oyeyemi\*<sup>1</sup>, Umar M. Bello<sup>1</sup>, Saratu T. Philemon<sup>2</sup>, Habeeb N. Aliyu<sup>1</sup>, Rebecca W.  
10 Majidadi<sup>1</sup>, Adetoyeje Y. Oyeyemi<sup>1</sup>  
11  
12 6

13  
14 7 <sup>1</sup>Department of Physiotherapy, College of Medical Sciences, University of Maiduguri,  
15 Nigeria  
16 8

17 9 <sup>2</sup> Department of Physiotherapy, Jos University Teaching Hospital, Nigeria  
18 10  
19 11  
20 12

21  
22 13 \*Correspondence to Dr. Adewale L. Oyeyemi, Department of Physiotherapy, College of  
23 14 Medical Sciences, University of Maiduguri, Nigeria. Email: [alaoyeyemi@yahoo.com](mailto:alaoyeyemi@yahoo.com);  
24 15 Telephone: +234-802-945-8230  
25  
26 16  
27 17  
28 18  
29 19  
30 20

31 18 **Key words:** Physical activity, measurements, public health, IPAQ, Nigeria  
32 19  
33 20  
34 21  
35 22  
36 23  
37 24  
38 25  
39 26  
40 27  
41 28  
42 29  
43 30  
44 31  
45 32  
46  
47  
48  
49  
50  
51  
52  
53  
54  
55  
56  
57  
58  
59  
60

20 **Word counts:** 4153

1  
2  
3  
4  
5  
6  
7  
8  
9  
10  
11  
12  
13  
14  
15  
16  
17  
18  
19  
20  
21  
22  
23  
24  
25  
26  
27  
28  
29  
30  
31  
32  
33  
34  
35  
36  
37  
38  
39  
40  
41  
42  
43  
44  
45  
46  
47  
48  
49  
50  
51  
52  
53  
54  
55  
56  
57  
58  
59  
60

### 33 ABSTRACT

34 **Objectives:** To investigate the reliability and validity of a modified version of the long  
35 International Physical Activity Questionnaire (Hausa IPAQ-LF) in Nigeria.

36 **Design:** Cross-sectional study, examining the test-retest reliability and construct validity of the  
37 Hausa IPAQ-LF compared with anthropometric and biological variables.

38 **Setting:** Metropolitan Maiduguri, the capital city of Borno State in Nigeria.

39 **Participants:** 180 Nigerian adults (50% women) with a mean age of 35.6 (SD=10.3) years,  
40 purposively selected from neighbourhood with diverse socioeconomic status and walkability.

41 **Outcome measures:** Domains (domestic PA, occupational PA, leisure-time PA, active  
42 transportation and sitting time) and intensities of PA (vigorous, moderate and walking) were  
43 measured with the Hausa IPAQ-LF on two different occasions, eight days apart. Outcomes for  
44 construct validity were measured BMI, SBP and DBP.

45 **Results:** The Hausa IPAQ-LF demonstrated good test-retest reliability ( $ICC > 0.75$ ) for total PA  
46 ( $ICC = 0.79$ , 95% CI=0.65-0.82), occupational PA ( $ICC = 0.77$ , 95% CI=0.68-0.82), active  
47 transportation ( $ICC = 0.82$ , 95% CI=0.75-0.87) and vigorous intensity activities ( $ICC = 0.82$ , 95%  
48 CI=0.76-0.87). Reliability was substantially higher for total PA ( $ICC = 0.80$ ), occupational PA  
49 ( $ICC = 0.78$ ), leisure-time PA ( $ICC = 0.75$ ) and active transportation ( $ICC = 0.80$ ) in men than  
50 women, but domestic PA ( $ICC = 0.38$ ) and sitting time ( $ICC = 0.71$ ) demonstrated substantial  
51 reliability coefficients in women than men. For the construct validity, domestic PA was  
52 significantly related mainly with SBP ( $\rho = -0.27$ ) and DBP ( $\rho = -0.17$ ), and leisure-time PA and  
53 total PA were significantly related only with SBP ( $\rho = -0.16$ ) and BMI ( $\rho = -0.29$ ), respectively.  
54 Similarly, moderate-intensity PA was mainly related with SBP ( $\rho = -0.16$ ,  $p < 0.05$ ) and DBP ( $\rho$   
55 =  $-0.21$ ,  $p < 0.01$ ), but vigorous-intensity PA was only related with BMI ( $\rho = -0.11$ ,  $p < 0.05$ ).

56 **Conclusions:** The modified Hausa IPAQ-LF demonstrated sufficient evidence of test-retest  
57 reliability and may be valid for assessing context specific PA behaviours of adults in Nigeria.

**ARTICLE SUMMARY****Strengths and limitations of this study.**

- Systematic adaptation and tailoring of items on the original IPAQ-LF to reflect the common PA behaviours of adults in Nigeria.
- The first study to describe the cultural adaptation and translations of the IPAQ-LF and explore its psychometric relevance in an African country.
- Findings establish evidence to support the feasibility of using a modified IPAQ-LF to reliably collect context specific PA behaviours of adults in the African region.
- The non-availability of objective criterion measures of PA to validate the modified IPAQ-LF limit comparability of our validity findings to that of many studies from the developed countries.
- The use of non-probability sampling technique may limit generalizability of findings to other samples of Nigerian adults with different characteristics from the study's sample.

## 106 INTRODUCTION

107  
108 The importance of physical activity (PA) for promoting health and preventing disease is well  
109 established.[1-3] However, for effective health promotion and PA surveillance and monitoring, it  
110 is important to have standardized, reliable and valid instruments that can be used to accurately  
111 describe population levels and patterns of PA within and across countries.[4, 5] In this context,  
112 the international physical activity questionnaire (IPAQ) was developed to obtain internationally  
113 comparable data on health-related physical activity of adults (18-65 years).[5, 6] Two versions of  
114 the IPAQ that could be administered by interview or self-completed were developed. The short  
115 form (SF) was designed for population surveillance of PA; while the long form (LF) was  
116 designed to be appropriate for use in research that requires detailed information on different PA  
117 domains, including PA at work, household, during leisure and transportation, and time spent in  
118 sedentary activities.[6]

119  
120 The initial evaluation of the IPAQ across 12 countries produced acceptable evidence of  
121 reliability and validity that are as good as other self-report measures of PA.[5] Consequently, in  
122 order to enhance the utility of IPAQ and to further evaluate its psychometrics worldwide, efforts  
123 have been made to translate and adapt the IPAQ in many other countries, but most of the  
124 research in this context were from the Western developed countries.[7-14] In Africa, the  
125 psychometric properties of IPAQ have only been tested in South-Africa as part of the initial  
126 development process of the questionnaire,[5] and in older adults.[15] Because the largest  
127 increases and burden of non-communicable diseases (NCDs) are in the low-income countries  
128 where the understanding of evidence-based strategies for increasing PA remains poor,[16-19]  
129 improving PA research is a top priority for low-income countries.[20] However, to advance PA  
130 research in Africa, it is important to first develop or tailor standardized measures to be culturally  
131 sensitive to PA behaviours of people in the region countries. Because Nigeria is the most  
132 populous country in Africa with culture and languages similar to most of the other West African  
133 countries, it is a good choice to evaluate the IPAQ for cultural and psychometric relevance in this  
134 country.

135

1  
2  
3 136 Recently, a cultural adaptation study of the IPAQ-SF was conducted among adults in  
4  
5 137 Nigeria,[21] with good evidence of test-retest reliability similar to findings in some other  
6  
7 138 studies.[10, 22-24] However, because the IPAQ-SF is not domain specific and does not provide  
8  
9 139 context specific information on PA behaviour, it is important to evaluate the IPAQ-LF for  
10  
11 140 relevance in Nigeria. Psychometric evaluation of a culturally modified version of the IPAQ-LF  
12  
13 141 in sub-Saharan African countries can impact PA research and surveillance in the African region  
14  
15 142 where the prevalence of inactivity related NCDs is on the increase.[20, 25] The aim of the  
16  
17 143 present study was to investigate the test-retest reliability and construct validity of a modified  
18  
19 144 version of the IPAQ-LF among adults in Nigeria.  
20

## 21 146 **METHODS**

### 24 148 **Participants**

26 149 A purposive sample of 180 adults from eight neighbourhoods that varied in socioeconomic status  
27  
28 150 and walkability in Maiduguri city were recruited for the study. The neighbourhood selection  
29  
30 151 strategy has been described in details elsewhere.[26] Maiduguri with an estimated population of  
31  
32 152 749,123 people is the largest and capital city of Borno State in North-Eastern Nigeria.[27] The  
33  
34 153 city attracts immigrants from neighbouring countries of Cameroon, Niger and Chad Republic,  
35  
36 154 and Hausa language is the common means of communication for commercial activities among  
37  
38 155 the diverse inhabitants of Maiduguri.[27, 28] Participants were eligible for this study if they were  
39  
40 156 willing to complete a written survey twice in English Language, the official language in Nigeria.  
41  
42 157 Additional eligibility criteria included living within the identified neighbourhood categories in  
43  
44 158 the last 12 months, being adults (18-65 years) and not having any disability that prevented  
45  
46 159 independent walking. All participants were fully informed of the study protocol and provided  
47  
48 160 written informed consent. The study protocol was approved by the Research and Ethic  
49  
50 161 Committee of the University of Maiduguri Teaching Hospital, Maiduguri, Nigeria. Data were  
51  
52 162 collected between March and May, 2012.  
53

### 53 164 **Measures**

55 165 *The adapted international physical activity questionnaire- long Hausa version*

1  
2  
3 166 The cultural adaptation, translation and back translation of the Hausa version of IPAQ-LF is  
4  
5 167 similar to that of the Hausa IPAQ-SF that has been described in details elsewhere.[21] Briefly,  
6  
7 168 interviews were conducted with public health experts, exercise scientists and not highly educated  
8  
9 169 local people to identify the items and examples of PA on the original questionnaires that needed  
10  
11 170 to be culturally adapted. Several cultural adaptations were made to the original items to reflect  
12  
13 171 the reality in Nigeria. First, adjustments to English words like vigorous and moderate activity  
14  
15 172 that can be misunderstood and not associated with PA behaviours in Nigeria were replaced with  
16  
17 173 words that are more representative of the language used in Nigeria, like 'very hard' and 'hard'  
18  
19 174 respectively. Second, examples of various intensities of activity that were common in the  
20  
21 175 Nigerian culture were added, and those already on the questionnaire but not common in the  
22  
23 176 Nigerian context were replaced with culturally applicable examples that are equivalent in energy  
24  
25 177 intensity (METs) with the original items and examples. Third, concepts like physical activity and  
26  
27 178 walking for transportation that were misconstrued outside the health context were refined to  
28  
29 179 indicate they were referring to health behaviours.

30  
31 181 After adaptation, the questionnaire was independently translated from English into Hausa  
32  
33 182 language by two native speakers of Hausa who also speaks English, and able to read and write in  
34  
35 183 both languages. One of the translators was familiar with the questionnaire and the second was an  
36  
37 184 expert in Hausa language. The translated questionnaires were mutually revised by the translators  
38  
39 185 and the research team for consistency and then back translated into English language by a third  
40  
41 186 bilingual person who was familiar with the construct measured by IPAQ. The back translated  
42  
43 187 version was checked by the research team for any discrepancies and to ensure that the construct  
44  
45 188 measures by IPAQ had not been lost during the adaptation and translation process.

46  
47 190 The modified questionnaire, hereafter referred to as the Hausa version of the long international  
48  
49 191 physical activity questionnaire (Hausa IPAQ-LF), contains thirty-one questions that asked about  
50  
51 192 physical activity done in the last 7-days in terms of frequency (days/week) and duration  
52  
53 193 (min/day) spent in four activity domains (transportation, occupation, domestic and leisure time),  
54  
55 194 and included sections on walking, moderate- and vigorous- intensity activities, and time spent in  
56  
57 195 sedentary behaviours (sitting during leisure and motorized transportation). The Hausa IPAQ-LF

1  
2  
3 196 data were presented as the MET-min/week for total walking, moderate, and vigorous intensity  
4  
5 197 activity and overall physical activity across the four domains, and in each of the domains. The  
6  
7 198 MET intensity values used to score the Hausa IPAQ-LF questions in this study were 8 METs for  
8  
9 199 vigorous activity, 4 METs for moderate activity and 3.3 METs for walking,[2, 6] One MET  
10  
11 200 represents the energy expended while sitting quietly at rest and is equivalent to 3.5 ml/kg/min of  
12  
13 201 VO<sub>2</sub> Max.[3] To assess the test-retest reliability of the Hausa IPAQ-LF, participants completed  
14  
15 202 all items on the measure twice, with an interval of one week between administrations.  
16  
17 203

### 18 204 *Anthropometrical and biological measurements*

19 205 Body weight (to nearest 0.5 kg) and Height (to nearest 0.1 cm) were measured in light clothing  
20  
21 206 using a digital scale and stadiometer. Body mass index (BMI) was calculated as body weight  
22  
23 207 divided by the square of height (kg/m<sup>2</sup>). The principal cutoff points as recommended by WHO  
24  
25 208 were used to create the categories: underweight (< 18.5 kg/m<sup>2</sup>), normal weight (18.5– < 25  
26  
27 209 kg/m<sup>2</sup>), overweight (25– <30kg/m<sup>2</sup>) and obese (≥30 kg/m<sup>2</sup>).[28] Resting blood pressure and heart  
28  
29 210 rate were measured with Digital Sphygmomanometer (Diagnostic Advanced Wrist Blood  
30  
31 211 Pressure Monitor, Model 6016, USA). Body mass index and resting diastolic blood pressure  
32  
33 212 (DBP) have previously been used for validating the IPAQ.[7,24] Similarly, for this study,  
34  
35 213 construct validity was evaluated by investigating the relationship of outcomes from the Hausa  
36  
37 214 IPAQ-LF with anthropometric (BMI) and biological (SBP and DBP) measurements, and also by  
38  
39 215 comparing the differences in time spent in PA and sitting across sociodemographic subgroups.  
40  
41 216 These types of validation for PA measures have been referred as indirect or construct validity in  
42  
43 217 previous studies.[7,24,30]  
44

### 45 219 *Sociodemographic Characteristics*

46 220 Information on age, gender, marital status, religion, income, educational level and employment  
47  
48 221 status were elicited from the participants. Marital status was classified as married or not married.  
49  
50 222 Educational level was classified as more than secondary school education, secondary school  
51  
52 223 education and less than secondary school education. Employment status was classified into white  
53  
54 224 collar (government or private employed), blue collar (self- employed, trader, artisan etc) and  
55  
56 225 unemployed (homemaker, student, retired, or unable to find job).  
57  
58  
59  
60



226

## 227 **Data Analysis**

228 Descriptive data were reported as mean, standard deviation and percentages. Mean group  
229 differences for continuous variables by gender were examined by independent t-test, and for  
230 dichotomous variables by chi-square statistics. The two- way mixed model (single measure)  
231 intraclass correlation coefficient (ICC) with 95% confidence interval (CI) was utilized to  
232 evaluate test-retest reliability of the instrument. The reliability analyses were conducted overall,  
233 and by gender and socioeconomic status. ICC estimates >0.75 were considered as good  
234 reliability scores, between 0.50 and 0.75 as moderate reliability and <0.50 as poor reliability.[31]  
235 To assess construct validity, the non-parametric Spearman correlation coefficients ( $\rho$ ) were  
236 utilized to explore the relationship between MET-min/week of PA from the Hausa IPAQ- LF,  
237 and resting blood pressure and body mass index. Independent t-test and one-Way ANOVA were  
238 used as appropriate to compare the time spent (minutes/week) in PA across sociodemographic  
239 subgroups. Data were analyzed using Statistical Package for the Social Science (SPSS), version  
240 15.0 for windows (SPSS Inc., Chicago, Illinois, USA) and the level of significance was set at  
241  $p<0.05$ .

242

## 243 **RESULTS**

244 The socio-demographic characteristic of the participants are shown in Table 1. The participants  
245 comprised 50% women and men, with a mean age of  $35.6 \pm 10.3$  years and body mass index of  
246  $23.8 \pm 3.9\text{kg/m}^2$ . Majority of the participants were married (58.9%,  $n=106$ ), had more than  
247 secondary school education (62.7%,  $n=111$ ) and were employed (75%,  $n=117$ ). Compared to  
248 men, the women were more likely to be married (71.1% vs 46.7%,  $p=0.001$ ) and unemployed  
249 (52.2% vs 17.8%,  $p<0.001$ ), but men were more likely to have more than secondary school  
250 education (76.7% vs 48.2%,  $p<0.001$ ).

251

### 252 **Test-retest Reliability**

253 Table 2 shows the test-retest reliability of the modified IPAQ-LF. Overall, reliability coefficients  
254 were good (ICC >0.75) for total PA, occupational PA, active transportation and vigorous intensity  
255 (very hard) PA. Domestic PA, sitting activity and leisure PA demonstrated moderate reliability

1  
2  
3 256 (ICC ranges from 0.51- 0.71). While, the reliability coefficients of total PA (ICC=0.80, 95%  
4 CI=0.69-0.87), active transportation (ICC=0.83, 95% CI=0.73-0.89), occupational PA  
5 257 (ICC=0.78, 95% CI=0.66-0.85) and leisure time PA (ICC=0.75, 95% CI=0.63-0.84) were  
6  
7 258 substantially higher among men than women, reliability coefficients for domestic PA (ICC=0.38,  
8 259 95%, CI=0.01-0.57) and sitting time (ICC=0.71, 95% CI=0.46-0.85) were higher among women  
9 260 than men. According to the intensity of PA, ICCs range between 0.61 and 0.82, with the lowest  
10 261 value recorded for moderate intensity (hard) PA and the highest value for vigorous intensity  
11 262 (very hard) PA. The reliability coefficients for walking, moderate-intensity (hard) and vigorous  
12 263 intensity (very hard) activities were substantially greater in men than women.  
13  
14  
15  
16  
17  
18  
19  
20

21 266 Similarly, socioeconomic status differences were observed in the reliability coefficients of the  
22 267 modified IPAQ-LF (Table 3). Across all domains of PA, reliability coefficients were  
23 268 substantially higher among participants with less than secondary school education (ICC from  
24 269 0.77 [sitting activity] to 0.92 [leisure activity]) compared to those with secondary school  
25 270 education (ICC from 0.28 [active transport] to 0.58 [occupational activity]) and higher than  
26 271 secondary school education (ICC from 0.23 [sitting activity] to 0.67[active transport]). While  
27 272 reliability coefficients were higher for overall PA (ICC=0.80, 95% CI=0.71- 0.86), active  
28 273 transport (ICC=0.83, 95% CI=0.74- 0.88), occupational PA (ICC=0.79, 95% CI=0.70- 0.86) and  
29 274 leisure-time PA (ICC= 0.79, 95% CI= 0.69- 0.85) among participants that were employed  
30 275 compared to their unemployed counterparts, it was higher for domestic PA (ICC=0.65, 95%  
31 276 CI=0.43- 0.79) and sitting time (ICC= 0.68, 95% CI= 0.36- 0.83) among participants that were  
32 277 unemployed than in the employed subgroup.  
33  
34  
35  
36  
37  
38  
39  
40  
41  
42  
43

278

#### 279 **Construct Validity**

44  
45  
46 280 Overall, correlations between energy expenditure (MET-Min/wk) according to the modified  
47 281 IPAQ-LF and anthropometric and biological measures were statistically significant in the  
48 282 expected direction for all domains and intensities of PA, except for occupation and active  
49 283 transport domains and walking (table 4). In the full sample, domestic PA was mainly related with  
50 284 SBP ( $\rho = -0.27$ ,  $p < 0.01$ ) and DBP ( $\rho = -0.17$ ,  $p < 0.05$ ), while leisure PA and total PA were only  
51 285 related with SBP ( $\rho = -0.16$ ,  $p < 0.05$ ) and BMI ( $\rho = -0.29$ ,  $p < 0.01$ ), respectively. Similarly,  
52  
53  
54  
55  
56  
57  
58  
59  
60

1  
2  
3 286 moderate-intensity PA was mainly related with SBP ( $\rho = -0.16$ ,  $p < 0.05$ ) and DBP ( $\rho = -0.21$ ,  $p <$   
4 287  $0.01$ ), but vigorous-intensity PA was only related with BMI ( $\rho = -0.11$ ,  $p < 0.05$ ). In the gender  
5  
6 288 based analyses, total PA, domestic PA and sedentary time were more consistently related with  
7  
8 289 anthropometric and biological variables. The strongest rho value ( $-0.41$ ) was found for the  
9  
10 290 relationship between total PA and BMI for the male subgroup. The rho values of  $-0.23$  was  
11  
12 291 reached between total PA and DBP for the women subgroup. Only in women was domestic PA  
13  
14 292 significantly related with BMI ( $\rho = -0.23$ ), DBP ( $\rho = -0.20$ ) and SBP ( $\rho = -0.31$ ). Leisure-time  
15  
16 293 PA ( $\rho = -0.39$ ) and occupational PA ( $\rho = -0.22$ ) were significantly related with BMI only in men.  
17  
18 294 The rho value for the relationship between sitting time and BMI was slightly higher in women ( $\rho$   
19 295  $= 0.19$ ) than men ( $\rho = 0.15$ ).  
20  
21 296

22  
23 297 Table 5 shows the patterns of PA across sociodemographic subgroups during the first (IPAQ1)  
24 298 and second (IPAQ2) administrations of the modified IPAQ-LF. Overall and across all stratified  
25  
26 299 variables, time spent in PA reported during the first administration tends to be higher than those  
27  
28 300 reported during the second administration. At both time points, men reported significantly  
29  
30 301 ( $p < 0.05$ ) higher mean time (Min week<sup>-1</sup>) in active transportation, occupational PA, and leisure-  
31  
32 302 time PA than women. However, women spent significantly ( $p < 0.001$ ) more time (Min week<sup>-1</sup>) in  
33  
34 303 domestic PA than men (IPAQ1=236.9 vs 82.3, IPAQ2=195.5 vs 52.4). For educational status,  
35  
36 304 participants that had lower than secondary school education compared to those with at least  
37  
38 305 secondary school education reported statistically significant higher mean time (Min week<sup>-1</sup>) at  
39  
40 306 both time points for total PA, active transport, occupational PA, walking and vigorous intensity  
41  
42 307 activity compared to those with at least secondary school education. While participants that were  
43  
44 308 employed reported statistically significant ( $p < 0.05$ ) more time (Min week<sup>-1</sup>) in total PA  
45  
46 309 (IPAQ1=441.1 vs 285.1, IPAQ2=359.4 vs 141.0), active transportation (IPAQ1=43.8 vs 21.1,  
47  
48 310 IPAQ2=36.9 vs 18.3) and work PA (IPAQ1=195.5 vs 41.8, IPAQ2=164.1 vs 40.1) than those  
49  
50 311 who were unemployed, the unemployed reported statistically significant ( $p < 0.05$ ) higher time in  
51  
52 312 domestic activity (IPAQ1=210.6 vs 132.1, IPAQ2=205.0 vs 112.6) compared to the employed.  
53  
54 313

## 53 314 **DISCUSSION**

54  
55  
56  
57  
58  
59  
60

1  
2  
3 315 This study examined aspects of reliability and validity of a modified version of the IPAQ-LF in  
4  
5 316 Nigeria. The findings generally indicated acceptable test-retest reliability and construct validity  
6  
7 317 for items of the modified IPAQ-LF among Nigerian adults. To the best of our knowledge, the  
8  
9 318 present study is the only one to examine the reliability and validity of the long version of IPAQ  
10  
11 319 that has been modified specifically to an indigenous African culture and language.  
12  
13 320

14 321 We found evidence for good reliability with high correlations between the test-retest for total  
15  
16 322 PA, occupational PA, active transportation and vigorous intensity activity. Our results shows that  
17  
18 323 except for domestic PA and sitting time, ICC values for domains of PA were consistently above  
19  
20 324 0.70, a level of reproducibility that has been considered acceptably good for IPAQ data.[32,33]  
21  
22 325 Similar to a previous IPAQ-LF study in Hong Kong,[33] domestic activity demonstrated the  
23  
24 326 lowest ICC value in our study. However, it is possible that the infrequent nature of household  
25  
26 327 activities undertaken, especially by men may account for the low reliability reported for domestic  
27  
28 328 PA in our study. In addition to the traditional African patriarchal belief that make most African  
29  
30 329 men to rarely engage in indoor household activities, men in the high socioeconomic group in  
31  
32 330 Nigeria may also not engage in outdoor domestic activities like gardening and outdoor home,  
33  
34 331 appliances and equipment maintenance because they are able to employ the services of domestic  
35  
36 332 helpers and repair men. Our findings of lower reliability for domestic activity among men, those  
37  
38 333 with more than secondary school education and those who were employed compared to their  
39  
40 334 counterparts seem to support this assumption.  
41  
42 335

43 336 The highest and strongest reliability coefficients (0.82) were found for both active transportation  
44  
45 337 and vigorous intensity activity. Perhaps, active transportation was more stable, consistent and  
46  
47 338 reproducible overtime than other PA domains because it is a common and ubiquitous PA  
48  
49 339 behaviour in the African region. Mostly, the performance of active transportation especially  
50  
51 340 walking is often out of necessity rather than choice within the African context. Our finding of  
52  
53 341 higher ICC value for vigorous intensity PA is consistent with those of other studies that found  
54  
55 342 the reliability of vigorous intensity activity to be higher compared to that of moderate intensity  
56  
57 343 activity.[10, 30, 33, 34] Compared to structured vigorous physical activities like sports and  
58  
59 344 exercise that can be more easily recalled, moderate intensity PA are often of low salience,  
60

1  
2  
3 345 incidental and may not easily be remembered by people.[35, 36] Further our finding that the  
4  
5 346 reliability of vigorous intensity physical activity was meaningfully higher among men than  
6  
7 347 women seem to confirm our previous findings with the IPAQ-SF.[21] Plausibly men in Nigeria  
8  
9 348 are more consistent than women when responding to PA items that pertained to intense vigorous  
10  
11 349 PA than other intensities of activity. Overall, the moderate to good evidence of reliability found  
12  
13 350 for all items indicates that the modified IPAQ-LF is reproducible, internally consistent and is  
14  
15 351 promising for research in Nigeria.

16 352  
17  
18 353 In the absence of objective criterion standards for evaluating an absolute estimate of PA, the  
19  
20 354 consistency of items on IPAQ with variables known to be related to PA such as body mass index  
21  
22 355 (BMI), blood pressure, heart rate, indicators of lipid and glucose metabolism, and fitness index  
23  
24 356 have been used as important construct validity measures.[7, 10, 21, 24] In the present study, the  
25  
26 357 correlations of the PA domains and intensities with biological and anthropometric variables were  
27  
28 358 mostly significant in the expected direction, but they were low suggesting a modest evidence of  
29  
30 359 construct validity for the modified IPAQ-LF in Nigeria. However, observed correlations were  
31  
32 360 comparable with the values in other studies that have evaluated the IPAQ-LF.[5, 7, 8, 24, 30, 33,  
33  
34 361 37] Because better validity coefficients have been reported for other PA measures above that of  
35  
36 362 the IPAQ,[37, 38] with the present African finding, it is possible that the IPAQ-LF only have  
37  
38 363 modest evidence of construct validity Worldwide.

39 364  
40 365 One interesting finding was that total PA was strongly and inversely related with BMI of men  
41  
42 366 and women. This is biologically plausible because total energy expenditure would be expected to  
43  
44 367 have the strongest effects on BMI. Similarly, domestic PA was related with resting blood  
45  
46 368 pressure and BMI in the expected direction, and this was mainly among women. Contrarily, no  
47  
48 369 such gender based associations of domestic PA with health variables were found in previous  
49  
50 370 studies of the western developed countries.[10, 24] It is possible that African women are  
51  
52 371 accumulating domestic related PA at sufficient intensities needed to circumvent deleterious  
53  
54 372 health outcomes. This kind of finding has implications for intervention strategies formulation,  
55  
56 373 considering that domestic activities are common and dominant PA behaviour among women in  
57  
58 374 Africa. In the present study, only in the domains of sitting and domestic PA did women

1  
2  
3 375 accumulate more time than men. Perhaps, promotion of the typical domestic related activities  
4  
5 376 like households chores, sweeping of compound and pounding of grains as integral components of  
6  
7 377 health enhancing PA (HEPA) of women in Nigeria could be an important public health strategy  
8  
9 378 for controlling the rising incidence of NCDs in this country, where current estimates indicate the  
10  
11 379 prevalence of overweight/obesity as 33.3% (37.7% women and 28.8% men) and that NCDs  
12  
13 380 already account for 27% (28.5% in women; 25.45 in men) of all deaths.[39]

14 381  
15  
16 382 Similar to the finding of a Mexican study,[40] we found scores on the modified IPAQ-LF to be  
17  
18 383 consistently lower during the second administration of the questionnaire compared to the first  
19  
20 384 administration. Because familiarity with the IPAQ questions may improve over multiple  
21  
22 385 exposures to the questionnaire, it is possible that participants in our study might have over-  
23  
24 386 reported their PA levels during the first administration of the IPAQ. This kind of findings may  
25  
26 387 have implication for the utility of IPAQ for surveillance. Generally, due to issues of social  
27  
28 388 desirability phenomenon and over reporting of PA that has been associated with the  
29  
30 389 IPAQ,[37,41] it may be necessary to start considering the need for multiple measurements when  
31  
32 390 using the IPAQ for evaluating PA, especially in developing African countries. However, patterns  
33  
34 391 of PA as measured by the modified IPAQ-LF during both administrations were consistently  
35  
36 392 similar, and both administrations were able to discriminate PA in the expected direction between  
37  
38 393 subgroups of our sample. For example, at both measurement time points, and consistent with  
39  
40 394 hypothesis, men reported more time in active transportation, occupational PA and leisure PA  
41  
42 395 than women, while women reported more time in domestic PA and sedentary activity than men.  
43  
44 396 These suggest an additional support for evidence of construct validity for the modified IPAQ-LF  
45  
46 397 in Nigerian adults.

47 398

### 48 399 **Strengths and limitations**

49 400 A strength of this study is the systematic adaptation and tailoring of items on the IPAQ-LF to  
50  
51 401 reflect the common PA behaviours of people in Nigeria. This is the first study in an African  
52  
53 402 country to explore the cultural adaptation and translation of the IPAQ-LF, and its findings  
54  
55 403 demonstrated the feasibility of using the IPAQ-LF to reliably collect PA data in a diverse  
56  
57 404 segment of the Nigerian population. In the Africa region, the importance of a valid and

1  
2  
3 405 established PA scale like the modified IPAQ-LF is not only important to monitoring the domain  
4  
5 406 in which activity is performed, but also very critical to understanding studies of ecological  
6  
7 407 models of health behaviours, that emphasize the importance of multiple levels of influence on  
8  
9 408 health behaviours including PA.[18,42] In Nigeria, emerging evidence from studies using  
10  
11 409 ecological models indicate that favourable built environmental attributes are promising for  
12  
13 410 improving total and moderate-to-vigorous PA and controlling obesity among adults.[26, 43-45]  
14  
15 411 However, built environment characteristics are expected to be strongly related to specific PA  
16  
17 412 types rather than overall PA.[46, 47] For example, different environmental variables can be  
18  
19 413 related to walking for leisure or transportation and to moderate PA for household, occupation,  
20  
21 414 recreation or transportation. Thus, a study of adaptation of the IPAQ-LF is very important to  
22  
23 415 understanding the domain specific nature of ecological model research in the African region.  
24  
25 416 One additional strength was the exploration of PA patterns by gender, educational level and  
26  
27 417 employment status, the findings of which were consistent with general hypothesis on social  
28  
29 418 patterns of inactivity in low-income countries.[20, 48]

30  
31 419  
32 420 However, the findings of this study should be interpreted in the light of some important  
33  
34 421 limitations. Direct comparison of our validity findings with previous studies should be made with  
35  
36 422 caution, because unlike in our study, the accelerometer or PA diary were utilized as a common  
37  
38 423 objective criterion standard to validate the IPAQ in the majority of the studies.[5, 7, 8, 24, 30, 33,  
39  
40 424 37] Despite this issue, the validity coefficients in our study were remarkably similar to those  
41  
42 425 reported in these other studies. Because the choice and availability of appropriate criterion  
43  
44 426 measures are particular issues of concern for the validation of PA questionnaires in low-income  
45  
46 427 countries of Africa,[5, 49, 50] the use of simple and less expensive measures like biological and  
47  
48 428 anthropometric variables may represent a useful alternative. Another limitation of the study is  
49  
50 429 the use of non-probability sampling technique. The study finding may have limited  
51  
52 430 generalizability to other samples of Nigerians that have different characteristics from this  
53  
54 431 sample. In addition, the majority of participants have more than secondary school education with  
55  
56 432 potentially higher comprehension and recall ability than may be found in the general population.  
57  
58 433 However, recruitment from diverse neighbourhoods and settings allowed for a sample with  
59  
60

1  
2  
3 434 reasonable heterogeneity in age, occupational status, and ethnic backgrounds and made it  
4 possible to stratify the analyses by sociodemographic characteristics.  
5 435  
6  
7 436

8  
9 437 **Conclusions**

10 438 Overall, the present study suggests that the modified IPAQ-LF demonstrated sufficient evidence  
11 of test-retest reliability and may be valid for assessing context specific PA behaviours of adults  
12 in Nigeria. Adaptation and criterion evaluation of the IPAQ-LF in other African countries could  
13 further contribute to our understanding of the impact of multiple levels of influence on physical  
14 activity behaviours of people in the African region.  
15  
16 441  
17 442  
18  
19 443  
20  
21 444

22  
23 445 **Acknowledgments**

24 446 The authors are grateful to Mrs. Salamatu U Aliyu and Mr. Sa'adu Inusa Kiriri for their help  
25 with questionnaire translations, and to the participants for their help \for taking part in the study.  
26 447  
27  
28 448

29  
30 449 **Contributors**

31 450 ALO conceived and designed the study, conducted the statistical analysis and interpretation of  
32 data and drafted the manuscript. UMB and STP managed participants' recruitment and data  
33 collection and revised the manuscript for important intellectual contents. HBN and RDM  
34 contributed to cultural adaptation and translations of the measure and revised the manuscript for  
35 important intellectual contents. AYO contributed to study design, acquisition and interpretation  
36 of data and critically revised the manuscript for important intellectual contents. All authors read  
37 and approved the final manuscript.  
38  
39 455  
40  
41 456  
42  
43 457

44  
45  
46 458 **Funding**

47 459 This research received no specific grant from any funding agency in the public, commercial or  
48 not-for-profit sectors.  
49 460  
50 461

51  
52  
53 462 **Competing interests**

54 463 Authors declare there is no competing interest associated with this study.  
55  
56  
57  
58  
59  
60



1  
2  
3 464  
4

5 465 **Ethics approval**

6  
7 466 Research and Ethic Committee of the University of Maiduguri Teaching Hospital, Nigeria  
8  
9 467 (ADM/TH/EC/75).

10 468  
11

12 469 **Data sharing process**

13  
14 470 Dataset for this study available upon request from the corresponding author.  
15  
16

17 471  
18  
19 472  
20  
21 473  
22  
23 474  
24  
25 475  
26  
27 476  
28  
29 477  
30  
31 478  
32  
33 479  
34  
35 480  
36  
37 481  
38  
39 482  
40  
41 483  
42  
43 484  
44  
45 485  
46  
47 486  
48  
49 487  
50  
51 488  
52  
53  
54  
55  
56  
57  
58  
59  
60

489 **References**

- 491 1. Garber CE, Blissmer B, Deschenes MR, *et al.* for the American College of Sports Medicine  
492 Quantity and quality of exercise for developing and maintaining cardiorespiratory,  
493 musculoskeletal, and neuromotor fitness in apparently healthy adults: guidance for  
494 prescribing exercise. *Med Sci Sports Exerc* 2011;43:1334-1359.
- 496 2. World Health Organization. Global recommendations on physical activity for health. WHO,  
497 Geneva, Switzerland; 2010.
- 499 3. Haskell WL, Lee I-M, Pate RP, *et al.* Physical activity and public health: updated  
500 recommendation for adults from the American College of Sports Medicine and the American  
501 Heart Association. *Circulation* 2007;116:1081-1093.
- 503 4. World Health Assembly 57.17. *Global strategy on diet and physical activity*. Geneva: World  
504 Health Organization. May 2004.
- 506 5. Craig CL, Marshall, AL, Sjoström M, *et al.* International physical activity questionnaire: 12  
507 country reliability and validity. *Med Sci Sports Exerc* 2003;35(8):1381-1395.
- 509 6. The IPAQ group. International physical activity questionnaire. 2014 Available at:  
510 <http://www.ipaq.ki.se/scoring.pdf>. Accessed May 21, 2014.
- 512 7. Hagstromer M, Oja P, Sjoström M. The international physical activity questionnaire (IPAQ)  
513 a study of concurrent and construct validity. *Public Health Nutr* 2006;9:755-762.
- 515 8. Hagstromer M, Ainsworth BE, Oja P, *et al.* Comparison of a subjective and an objective  
516 measure of physical activity in a population sample. *J Phys Act Health* 2010;7:541-550.
- 518 9. Maddison R, Mhurchu CN, Jiang Y, *et al.* International physical activity questionnaire  
519 (IPAQ) and New Zealand physical activity questionnaire (NZPAP): A doubly labeled water  
520 validation. *Int J Behav Nutr Phys Act* 2007;4:62.
- 522 10. Kurtze N, Rangul V, Hustveldt B. Reliability and validity of the international physical  
523 activity questionnaire in the Nord-Trøndelag Health Study (HUNT) population of men. *BMC*  
524 *Med Res Methodol* 2008;8:63.
- 526 11. Nicaise V, Marshall S, Ainsworth BE. Domain-specific physical activity and self-report bias  
527 among low-income Latinas living in San Diego county. *J Phys Act Health* 2011;8:881-890.
- 529 12. Vandelanotte C, De Bourdeaudunij I, Philippaerts R, *et al.* Reliability and validity of a  
530 computerized and Dutch version of the International Physical Activity Questionnaire (IPAQ).  
531 *J Phys Act Health* 2005;2;63-75.

- 1  
2  
3 533 13. Loney T, Standage M, Thompson D, *et al.* Self-Report vs. objectively assessed physical  
4 534 activity: which is right for public health? *J Phys Act Health* 2011;8:62-70.  
5 535  
6  
7 536 14. Mackay LM, Oliver M, Schofield GM. Demographic variations in discrepancies between  
8 537 objective and subjective measures of physical activity. *Open Journal of Preventive Medicine*  
9 538 2011;1:13-19.  
10 539  
11 540 15. Kolbe-Alexander TL, Lambert EV, Harkins JB *et al.* Comparison of two methods of  
12 541 measuring physical activity in South African older adults. *J Aging Phys Act* 2006;14:98-114.  
13 542  
14 543 16. Pratt M, Sarmiento OL, Montes F, *et al.* The implications of megatrends in information and  
15 544 communication technology and transportation for changes in global physical activity. *Lancet*  
16 545 2012;380:282-293.  
17 546  
18 547 17. Kohl 3<sup>rd</sup> HW, Criag CL, Lambert EV, *et al.* for the Lancet physical activity series working  
19 548 group (2012) The pandemic of physical inactivity: global action for public health. *Lancet*  
20 549 2012;380:294-305.  
21 550  
22 551 18. Bauman AE, Reis RS, Sallis JF, *et al.* Correlates of physical activity: why are some physical  
23 552 active and others not? *Lancet* 2012;380:258-271.  
24 553  
25 554 19. Heath GW, Parra DC, Sarmiento OL, *et al.* Evidence-based intervention in physical activity:  
26 555 lessons from around the world. *Lancet* 2012;380:278-281.  
27 556  
28 557 20. Hallal PC, Andersen LB, Bull FC, *et al.* for the Lancet physical activity series working  
29 558 group. Global physical activity levels: surveillance progress, pitfalls, and prospects. *Lancet*  
30 559 2012;380:247-257.  
31 560  
32 561 21. Oyeyemi AL, Oyeyemi AY, Adegoke BOA, *et al.* Cross Cultural Adaptation of the  
33 562 International Physical Activity Questionnaire: Reliability and Validity of the Hausa Version  
34 563 in Nigeria. *BMC Med Res Methodol* 2011;11:156.  
35 564  
36 565 22. Chu AH, Moy FM. Reliability and Validity of the Malay International Physical Activity  
37 566 Questionnaire (IPAQ-M) Among a Malay Population in Malaysia. *Asia Pac J Public Health*  
38 567 2013 Apr 17 [Epub ahead of print].  
39 568  
40 569 23. Chun MY. Validity and reliability of Korean version of international physical activity  
41 570 questionnaire short form in the elderly. *Korean J Fam Med* 2012;33:144-151.  
42 571  
43 572 24. Graff-Iversen S, Anderssen SA, Holme IM, *et al.* An adapted version of the long  
44 573 international physical activity questionnaire (IPAQ L): Construct validity in a low income,  
45 574 multiethnic population study from Oslo, Norway. *Int J Behav Nutr Phys Act* 2007;4:13.  
46 575  
47  
48  
49  
50  
51  
52  
53  
54  
55  
56  
57  
58  
59  
60

- 1  
2  
3 576 25. Lee IM, Shiroma EJ, Lobelo F, *et al.* for the Lancet physical activity series working group  
4 577 Effect of physical inactivity on major non-communicable diseases worldwide: an analysis of  
5 578 burden of diseases and life expectancy. *Lancet* 2012;380:219-229.  
6 579  
7 580 26. Oyeyemi AL, Sallis JF, Deforche B, *et al.* Evaluation of the Neighborhood Environment  
8 581 Walkability Scale in Nigeria. *Int J Health Geogr* 2013;12:16.  
9 582  
10 583 27. National Bureau of Statistics. Statistical fact sheet and population census. Federal Republic  
11 584 of Nigeria 2008. Available: <http://www.nigerianstat.gov.ng> Accessed 28 August 2012.  
12 585  
13 586 28. National Population Commission (NPC) [Nigeria] and ORC Macro (2004) Nigeria  
14 587 Demographics and Health Survey 2003. Calverton, Maryland: National Population  
15 588 Commission and ORC Macro  
16 589  
17 590 29. World Health Organization. Obesity: Preventing and Managing the Global Epidemic. WHO  
18 591 Technical Report Series 894. 2000. World Health Organization; 2000. Available:  
19 592 [http://whqlibdoc.who.int/trs/WHO\\_TRS\\_894.pdf](http://whqlibdoc.who.int/trs/WHO_TRS_894.pdf) Accessed 23 August 2013.  
20 593  
21 594 30. Vasheghani-Farahani A, Tahmusbi M, Sheri H, *et al.* The Persian, last 7-day, long form of  
22 595 the International Physical Activity Questionnaire: Translation and validation study. *Asian J*  
23 596 *Sports Med* 2011;2(2)106-116.  
24 597  
25 598 31. Portney L, White M. Foundations of clinical research. Applications to practice. New Jersey:  
26 599 Pearson Education Inc, 2009  
27 600  
28 601 32. Levy SS, Readdy RT. Reliability of the international physical activity questionnaire in  
29 602 research setting: last 7-day self administered long form. *Meas Phys Educ Exerc Sci*  
30 603 2009;13:191-205.  
31 604  
32 605 33. Macfarlane D, Chan A, Cerin E. Examining the validity and reliability of the Chinese version  
33 606 of the International Physical Activity Questionnaire, long form (IPAQ-LC). *Public Health*  
34 607 *Nutr* 2010;14(3),443-450.  
35 608  
36 609 34. Papathanasiou G, Georgoudis G, Papandreou M, *et al.* Reliability measures of the short  
37 610 international physical activity questionnaire (IPAQ) in Greek young adults. *Hellenic J*  
38 611 *Cardiol* 2009;50:283-294.  
39 612  
40 613 35. Sallis JF, Saelens BE. Assessment of physical activity by self-report: status, limitations, and  
41 614 future directions. *Res Q Exerc Sport* 2000;71:1-14.  
42 615  
43 616 36. Washburn RA, Heath GW, Jackson AW. Reliability and validity issues concerning large-  
44 617 scale surveillance of physical activity. *Res Q Exerc Sport* 2000;71:104-113.  
45 618  
46  
47  
48  
49  
50  
51  
52  
53  
54  
55  
56  
57  
58  
59  
60

- 1  
2  
3 619 37. Johnson-Kozlow M, Sallis JF, Gilpin EA, *et al.* Comparative validation of the IPAQ and the  
4 620 7-Day PAR among women diagnosed with breast cancer. *Int J Behav Nutr Phys Act*  
5 621 2006;3:7.  
6 622
- 7 623 38. Aishworth BE, Macera CA, Jones DA *et al.* Comparison of the 2001 BRFSS and the IPAQ  
8 624 physical activity questionnaire. *Med Sci Sports Exerc* 2006;38(9):1584-1592.  
9 625
- 10 626 39. World Health Organization. *WHO global infobase. Data for saving lifes.* World Health  
11 627 Organization; 2010. Available at: <https://apps.who.int/infobase/CountryProfile.aspx>.  
12 628 Accessed August 02, 2012.  
13 629
- 14 630 40. Medina C, Barquera S, Janssen I. Validity and reliability of the International Physical  
15 631 Activity Questionnaire among adults in Mexico. *Rev panam salud publica* 2013;34(1):21-28.  
16 632
- 17 633 41. Rzewnicki R, Vanden Auweele Y, De Bourdeaudhuij I. Addressing over-reporting on the  
18 634 International Physical Activity Questionnaire (IPAQ) telephone survey with a population  
19 635 sample. *Public Health Nutr* 2003;6:299–305.  
20 636
- 21 637 42. Sallis JF, Owen N, Fisher EB. Ecological models of health behavior. In: Glanz K, Rimer BK,  
22 638 Viswanath K, eds. *Health Behavior and Health Education: Theory, Research, and Practice*,  
23 639 4<sup>th</sup> edn. San Francisco: Jossey-Bass 2008, 465-486  
24 640
- 25 641 43. Oyeyemi AL, Adegoke BOA, Oyeyemi AY, *et al.* Perceived environmental correlates of  
26 642 physical activity and walking in African young adults. *Am J Health Promot* 2011;25 (5):e10-  
27 643 e19  
28 644
- 29 645 44. Oyeyemi AL, Adegoke BOA, Oyeyemi AY, *et al.* Environmental factors associated with  
30 646 overweight among adults in Nigeria. *Int J Behav Nutr Phys Act* 2012, 9:32  
31 647
- 32 648 45. Oyeyemi AL, Sallis JF, Adegoke BOA, *et al.* Perception of neighborhood safety is related  
33 649 with physical activity among adults in Nigeria. *BMC Public Health* 2012, 12:294  
34 650
- 35 651 46. Giles-Corti B, Timperio A, Bull F, *et al.* Understanding physical activity environmental  
36 652 correlates: increased specificity for ecological models. *Exerc Sports Sci Rev.* 2005; 33  
37 653 (4):175-181.  
38 654
- 39 655 47. Sallis JF, Cervero R, Ascher WW, *et al.* An ecological approach to creating active living  
40 656 communities. *Annu Rev Public Health* 2006;27:14.1-14.26  
41 657
- 42 658 48. Dumith SC, Hallal PC, Reis RS, Kohl HW 3<sup>rd</sup>. Worldwide prevalence of physical and its  
43 659 association with human development index in 76 countries. *Prev Med* 2011;50:24-28  
44 660
- 45 661 49. Oyeyemi AL, Umar M, Ugoche F, *et al.* Accelerometer-determined physical activity and its  
46 662 comparison with the International Physical Activity Questionnaire in a sample of Nigerian adults.  
47 663 *PLoS One*, 2014; 9 (1): e872333  
48 664

1  
2  
3 665 50. Sobnqwi E, Mbanya JCN, Urwin NC, *et al.* Development and validation of a questionnaire  
4 666 for the assessment of physical activity in epidemiological studies in Sub-Saharan Africa. *Int J*  
5 667 *Epidemiol* 2001;30:1361-1368.  
6 668  
7 669  
8 670  
9 671  
10 672  
11 673  
12 674  
13 675  
14 676  
15 677  
16 678  
17 679  
18 680  
19 681  
20 682  
21 683  
22 684  
23 685  
24 686  
25 687  
26 688  
27 689  
28 690  
29 691  
30 692  
31 693  
32 694  
33 695  
34 696  
35 697  
36 698  
37 699  
38 700  
39 701  
40 702  
41 703  
42 704  
43 705  
44 706  
45 707  
46 708  
47 709  
48  
49  
50  
51  
52  
53  
54  
55  
56  
57  
58  
59  
60

For peer review only

Table 1. Descriptive characteristics of the participants (N=180)

| Variables                          | Total sample<br>(N=180) | Men<br>(n=90, 50%) | Women<br>(n=90, 50%) |
|------------------------------------|-------------------------|--------------------|----------------------|
| <b>Age (years)</b>                 |                         |                    |                      |
| Mean ( $\pm$ SD)                   | 35.6 $\pm$ 10.3         | 35.7 $\pm$ 8.3     | 35.5 $\pm$ 11.9      |
| <b>Marital status (n, %)*</b>      |                         |                    |                      |
| Not Married                        | 74(41.1)                | 48(53.3)           | 26(28.9)             |
| Married                            | 106(58.9)               | 42(46.7)           | 64(71.1)             |
| <b>BMI (Kg/m<sup>2</sup>)</b>      |                         |                    |                      |
| Mean ( $\pm$ SD)                   | 23.8 $\pm$ 3.9          | 23.8 $\pm$ 3.5     | 23.8 $\pm$ 4.4       |
| <b>BMI Category (n, %)</b>         |                         |                    |                      |
| Underweight                        | 14 (7.8)                | 4 (4.4)            | 10 (11.1)            |
| Normal weight                      | 107 (59.4)              | 58 (64.4)          | 49 (54.4)            |
| Overweight/obese                   | 59 (32.8)               | 28 (31.2)          | 31 (34.5)            |
| <b>Ethnicity (n, %)</b>            |                         |                    |                      |
| Hausa/Fulani                       | 21(11.7)                | 10.1(11.1)         | 11(12.2)             |
| Igbo                               | 8(4.4)                  | 5(5.6)             | 3(3.3)               |
| Yoruba                             | 10(5.6)                 | 6(6.7)             | 4(4.4)               |
| Kanuri/Shuwa Arab                  | 44(24.4)                | 23(25.6)           | 21(23.3)             |
| Others                             | 97(53.9)                | 46 (51.1)          | 51(56.7)             |
| <b>Educational level (n, %)*</b>   |                         |                    |                      |
| > Secondary School                 | 111 (62.7)              | 11 (12.2)          | 17(19.5)             |
| Secondary                          | 38 (21.5)               | 10 (11.1)          | 28(32.5)             |
| <Secondary School                  | 28 (15.8)               | 69 (76.7)          | 42(48.2)             |
| <b>Occupational Status (n, %)*</b> |                         |                    |                      |
| Unemployed                         | 63(35)                  | 16(17.8)           | 47(52.2)             |
| Blue Collar                        | 45(25)                  | 28(31.1)           | 17(18.9)             |
| White Collar                       | 72(40)                  | 46(51.1)           | 26(28.9)             |

\*- Significant difference between samples ( $p < 0.05$ )

BMI- Body Mass Index

Table 2: Test-reliability based on intra-class correlation coefficient for Hausa IPAQ– LF, overall and by gender

| PA Measure (MET×min/wk)             | Total (N=180)      |                    |                  | Women (n=90)     | Men (n=90)         |
|-------------------------------------|--------------------|--------------------|------------------|------------------|--------------------|
|                                     | Test 1 (Mean (SD)) | Test 2 (Mean (SD)) | ICC (95%CI)      | ICC (95%CI)      | ICC (95%CI)        |
| Total PA, all domain                | 2160.6 (2691.1)    | 1612.8 (1612.8)    | 0.76 (0.65-0.82) | 0.45 (0.08-0.67) | 0.80 (0.69- 0.87)  |
| Occupation                          | 619.1(1671.5)      | 497.5 (1332.9)     | 0.77 (0.68-0.82) | 0.64 (0.46-0.77) | 0.78 (0.66 -0.85)  |
| Active Transport                    | 468.1 (684.7)      | 440.5 (605.7)      | 0.82 (0.75-0.87) | 0.63 (0.40-0.77) | 0.83 (0.73 - 0.89) |
| Domestic                            | 597.6 (754.6)      | 473.4 (673.7)      | 0.50 (0.32-0.62) | 0.38 (0.01-0.57) | 0.33 (-0.01-0.56)  |
| Leisure                             | 377.0 (1096.3)     | 196.7 (920.2)      | 0.71 (0.60-0.78) | 0.69 (0.53-0.79) | 0.75 (0.63-0.84)   |
| Sitting                             | 2263.0 (715.8)     | 2235.4 (818.9)     | 0.62 (0.42-0.75) | 0.71 (0.46-0.85) | 0.48 (0.06-0.72)   |
| <b>PA by Intensity (MET×min/wk)</b> |                    |                    |                  |                  |                    |
| Walking                             | 613.6 (635.6)      | 534.6 (449.1)      | 0.63 (0.48-0.74) | 0.57 (0.29-0.74) | 0.65 (0.44-0.78)   |
| Moderate                            | 986.9 (1365.9)     | 716.1 (1164.6)     | 0.61 (0.46-0.71) | 0.42 (0.11-0.62) | 0.67 (0.49-0.78)   |
| Vigorous                            | 526.5 (1543.7)     | 394.1 (1431.1)     | 0.82 (0.76-0.87) | 0.55 (0.30-0.71) | 0.86 (0.78-0.91)   |

PA= Physical Activity

MET= Metabolic Energy Turnover



Table 3: Socioeconomic status differences in test- retest reliability of the Hausa IPAQ- LF (N= 180)

| Socioeconomic Status               | Overall PA        | Active Transport  | Occupation PA     | Leisure PA        | Domestic PA      | Sitting           |
|------------------------------------|-------------------|-------------------|-------------------|-------------------|------------------|-------------------|
| <b>Educational Qualification</b>   |                   |                   |                   |                   |                  |                   |
| More than secondary school (n=111) | 0.42 (0.08-0.63)  | 0.67 (0.43-0.78)  | 0.32 (-0.06-0.57) | 0.33 (-0.05-0.57) | 0.58 (0.35-0.73) | 0.23 (-0.63-0.63) |
| Secondary School (n=38)            | 0.55 (0.22-0.74)  | 0.28 (-0.21-0.57) | 0.58 (0.33-0.74)  | 0.54 (0.25-0.71)  | 0.50 (0.19-0.69) | 0.51 (-0.04-0.76) |
| Less than Secondary school (n=28)  | 0.89 (0.67-0.96)  | 0.90 (0.74-0.96)  | 0.82 (0.61-0.92)  | 0.92 (0.83-0.96)  | 0.90 (0.78-0.95) | 0.77 (0.45-0.90)  |
| <b>Employment Category</b>         |                   |                   |                   |                   |                  |                   |
| Employed (117)                     | 0.80 (0.67-0.96)  | 0.83 (0.74-0.88)  | 0.79 (0.70-0.86)  | 0.79 (0.69-0.85)  | 0.36 (0.08-0.56) | 0.56 (0.23-0.75)  |
| Unemployed (63)                    | 0.09 (-8.86-0.56) | 0.68 (0.44-0.82)  | 0.16 (-0.39-0.49) | 0.25 (-0.24-0.55) | 0.65 (0.43-0.79) | 0.68 (0.36-0.80)  |

PA= Physical Activity

Table 4: Construct validity of Hausa IPAQ-LF: Spearman correlations between energy expenditure (MET×min/wk) from Hausa IPAQ– LF, and anthropometric and biological variables (N=180)

| MET×min/wk          | Overall (N = 180) |        |         | Female (n = 90) |         |         | Male (n = 90) |         |       |
|---------------------|-------------------|--------|---------|-----------------|---------|---------|---------------|---------|-------|
|                     | BMI               | DBP    | SBP     | BMI             | DBP     | SBP     | BMI           | DBP     | SBP   |
| <b>PA Domains</b>   |                   |        |         |                 |         |         |               |         |       |
| Total PA            | -0.29**           | -0.17* | -0.09   | -0.09           | -0.23** | -0.04   | -0.41**       | -0.08   | -0.14 |
| Occupation PA       | -0.12             | -0.09  | -0.01   | -0.02           | -0.02   | -0.05   | -0.22**       | -0.17   | -0.08 |
| Active transport PA | -0.05             | -0.04  | -0.01   | -0.10           | -0.13   | -0.02   | -0.04         | -0.02   | -0.80 |
| Domestic PA         | -0.07             | -0.17* | -0.26** | -0.23**         | -0.20*  | -0.31** | 0.04          | -0.14   | -0.04 |
| Leisure PA          | 0.09              | -0.08  | -0.16*  | -0.11           | 0.02    | 0.08    | -0.39**       | -0.12   | -0.06 |
| Sitting             | 0.16              | -0.09  | 0.04    | 0.19            | 0.12    | 0.05    | 0.15          | -0.09   | 0.05  |
| <b>PA Intensity</b> |                   |        |         |                 |         |         |               |         |       |
| Walking             | 0.90              | -0.09  | -0.03   | 0.19            | -0.05   | 0.08    | -0.05         | -0.11   | -0.15 |
| Moderate            | -0.02             | 0.21*  | 0.16*   | 0.02            | -0.14   | -0.08   | 0.02          | -0.25** | -0.16 |
| Vigorous            | -0.11*            | -0.06  | -0.03   | -0.16           | -0.01   | -0.02   | -0.13*        | -0.12   | -0.11 |

MET= Metabolic Energy Turnover

BMI= Body Mass Index

DBP= Diastolic Blood Pressure

SBP= Systolic Blood Pressure

PA= Physical activity

\*=p<0.05, \*\*=p<0.01

Table 5: Differences in time spent in physical activity overall, and by gender and socioeconomic status sub groups

|                                 | Gender             |                  |                    | Education               |                        |                         | Employment            |                         |
|---------------------------------|--------------------|------------------|--------------------|-------------------------|------------------------|-------------------------|-----------------------|-------------------------|
|                                 | Total<br>Mean ± SD | Men<br>Mean ± SD | Women<br>Mean ± SD | >Secondary<br>Mean ± SD | Secondary<br>Mean ± SD | <Secondary<br>Mean ± SD | Employed<br>Mean ± SD | Unemployed<br>Mean ± SD |
| <b>PA by domain (min/wk)</b>    |                    |                  |                    |                         |                        |                         |                       |                         |
| Total PA, all domain            |                    |                  |                    |                         |                        |                         |                       |                         |
| IPAQ1                           | 405.2 (507.8)      | 460.7 (582.9)    | 326.8 (367.8)      | 334.0 (400.8)           | 384.8 (514.8)          | 849.2 (764.1)**         | 441.1 (530.2)         | 285.1 (408.6)*          |
| IPAQ2                           | 308.4 (440.3)      | 319.7 (522.8)    | 291.9 (282.9)      | 285.1 (295.1)           | 184.8 (264.4)          | 803.0 (929.6)**         | 359.4 (481.6)         | 141.0 (185.2)*          |
| Active Transport                |                    |                  |                    |                         |                        |                         |                       |                         |
| IPAQ1                           | 35.8 (89.7)        | 52.4 (127.7)     | 19.5 (17.7)*       | 28.3 (47.7)             | 28.9 (45.02)           | 76.4 (198.7)*           | 43.8 (109.4)          | 21.1 (21.9)*            |
| IPAQ2                           | 30.4 (76.7)        | 41.2 (106.3)     | 19.3 (17.5)*       | 23.6 (30.6)             | 20.3 (30.9)            | 74.3 (182.6)*           | 36.9 (94.1)           | 18.3 (14.7)*            |
| Work                            |                    |                  |                    |                         |                        |                         |                       |                         |
| IPAQ1                           | 160.1 (380.8)      | 217.5 (466.8)    | 79.1 (179.9)*      | 114.8 (291.0)           | 122.9 (365.6)          | 546.7 (615.7)**         | 195.5 (418.8)         | 41.8 (162.2)*           |
| IPAQ2                           | 135.3 (310.3)      | 172.5 (372.8)    | 80.6 (171.9)*      | 104.1 (232.2)           | 160.9 (196.1)          | 531.6 (595.8)**         | 164.1 (341.7)         | 40.1 (133.0)*           |
| Domestic                        |                    |                  |                    |                         |                        |                         |                       |                         |
| IPAQ1                           | 159.6 (202.2)      | 82.3 (120.6)     | 236.9 (235.8)**    | 141.2 (182.4)           | 173.3 (238.5)          | 165.4 (159.4)           | 132.1 (170.7)         | 210.6 (243.8)*          |
| IPAQ2                           | 123.9 (163.9)      | 52.4 (74.9)      | 195.5 (190.1)**    | 131.9 (182.5)           | 107.6 (130.4)          | 147.3 (189.1)           | 112.6 (163.9)         | 205.0 (163.3)*          |
| Leisure                         |                    |                  |                    |                         |                        |                         |                       |                         |
| IPAQ1                           | 62.4 (159.1)       | 75.0 (211.1)     | 10.5 (27.3)**      | 47.0 (97.3)             | 92.7 (209.4)           | 38.2 (160.1)            | 69.7 (157.6)          | 48.7 (162.3)            |
| IPAQ2                           | 30.5 (118.2)       | 50.6 (160.7)     | 10.1 (38.5)**      | 23.4 (51.4)             | 24.7 (91.4)            | 71.5 (256.5)            | 43.1 (143.5)          | 17.0 (28.7)*            |
| Sitting                         |                    |                  |                    |                         |                        |                         |                       |                         |
| IPAQ1                           | 2263.0 (715.8)     | 2188.8 (759.7)   | 2330.7 (674.8)     | 2280.0 (618.7)          | 2433.9 (693.7)         | 2180.9 (760.8)          | 2159.4 (775.9)        | 2337.6 (667.2)          |
| IPAQ2                           | 2235.4 (819.9)     | 2208.7 (916.9)   | 2259.6 (728.1)     | 2420.7 (638.7)          | 2215.3 (663.1)         | 2160.0 (1111.4)         | 2170.6 (870.5)        | 2282.0 (785.5)          |
| <b>PA by Intensity (min/wk)</b> |                    |                  |                    |                         |                        |                         |                       |                         |
| Walking                         |                    |                  |                    |                         |                        |                         |                       |                         |
| IPAQ1                           | 178.5 (221.5)      | 241.1 (271.9)    | 128.2 (100.8)*     | 194.4 (268.1)           | 133.4 (85.6)           | 266.9 (285.4)*          | 192.0 (245.7)         | 133.3 (96.2)*           |
| IPAQ2                           | 142.5 (141.8)      | 148.5 (137.9)    | 133.7 (147.9)      | 151.7 (138.4)           | 103.6(94.7)            | 200.3 (209.1)*          | 150.7 (146.6)         | 115.4 (122.7)           |
| Moderate                        |                    |                  |                    |                         |                        |                         |                       |                         |
| IPAQ1                           | 201.9 (326.9)      | 193.0 (214.5)    | 214.5 (247.8)      | 187.3 (266.5)           | 194.9 (386.5)          | 309.7 (381.7)           | 221.2 (347.4)         | 137.7 (239.9)           |
| IPAQ2                           | 133.9 (238.5)      | 114.2 (276.9)    | 162.7 (165.6)      | 132.9 (177.8)           | 88.0 (197.2)           | 319.0 (482.1)*          | 153.9 (266.2)         | 68.0 (76.4)*            |
| Vigorous                        |                    |                  |                    |                         |                        |                         |                       |                         |
| IPAQ1                           | 94.1 (211.8)       | 123.7 (249.6)    | 52.2 (133.2)*      | 32.9 (81.9)             | 129.5 (208.2)          | 268.0 (459.7)**         | 90.2 (214.6)          | 127.1 (204.6)           |
| IPAQ2                           | 78.4 (206.9)       | 86.8 (227.4)     | 46.2 (73.4)        | 52.2 (140.2)            | 55.2 (127.0)           | 292.8 (461.5)**         | 92.8 (226.9)          | 130.9 (107.8)           |

1 PA= Physical Activity  
2 \*=p<0.05  
3 \*\*=p<0.001  
4  
5  
6  
7  
8  
9

For peer review only

10  
11  
12  
13  
14  
15  
16  
17  
18  
19  
20  
21  
22  
23  
24  
25  
26  
27  
28  
29  
30  
31  
32  
33  
34  
35  
36  
37  
38  
39  
40  
41  
42  
43  
44  
45  
46  
47  
48  
49

# BMJ Open

## Examining the reliability and validity of a modified version of the International Physical Activity Questionnaire, long form (IPAQ-L) in Nigeria: A cross-sectional study

|                                 |                                                                                                                                                                                                                                                                                                                                                                          |
|---------------------------------|--------------------------------------------------------------------------------------------------------------------------------------------------------------------------------------------------------------------------------------------------------------------------------------------------------------------------------------------------------------------------|
| Journal:                        | <i>BMJ Open</i>                                                                                                                                                                                                                                                                                                                                                          |
| Manuscript ID:                  | bmjopen-2014-005820.R1                                                                                                                                                                                                                                                                                                                                                   |
| Article Type:                   | Research                                                                                                                                                                                                                                                                                                                                                                 |
| Date Submitted by the Author:   | 04-Oct-2014                                                                                                                                                                                                                                                                                                                                                              |
| Complete List of Authors:       | Oyeyemi, Adewale; University of Maiduguri, Physiotherapy<br>Bello, Umar; University of Maiduguri, Physiotherapy<br>Philemon, Saratu; Jos University Teaching Hospital, Physiotherapy<br>Aliyu, Habibu; University of Maiduguri, Physiotherapy<br>Majidadi, Rebecca; University of Maiduguri, Physiotherapy<br>Oyeyemi, Adetoyeje; University of Maiduguri, Physiotherapy |
| <b>Primary Subject Heading</b>: | Public health                                                                                                                                                                                                                                                                                                                                                            |
| Secondary Subject Heading:      | Epidemiology, Sports and exercise medicine                                                                                                                                                                                                                                                                                                                               |
| Keywords:                       | PUBLIC HEALTH, SOCIAL MEDICINE, EPIDEMIOLOGY                                                                                                                                                                                                                                                                                                                             |
|                                 |                                                                                                                                                                                                                                                                                                                                                                          |

SCHOLARONE™  
Manuscripts

1  
2  
3  
4  
5  
6  
7  
8  
9  
10  
11  
12  
13  
14  
15  
16  
17  
18  
19  
20  
21  
22  
23  
24  
25  
26  
27  
28  
29  
30  
31  
32  
33  
34  
35  
36  
37  
38  
39  
40  
41  
42  
43  
44  
45  
46  
47  
48  
49  
50  
51  
52  
53  
54  
55  
56  
57  
58  
59  
60

1 **Examining the reliability and validity of a modified version of the International Physical**  
2 **Activity Questionnaire, long form (IPAQ-L) in Nigeria: A cross-sectional study**

3  
4 Adewale L. Oyeyemi\*<sup>1</sup>, Umar M. Bello<sup>1</sup>, Saratu T. Philemon<sup>2</sup>, Habeeb N. Aliyu<sup>1</sup>, Rebecca W.  
5 Majidadi<sup>1</sup>, Adetoyeje Y. Oyeyemi<sup>1</sup>

6  
7 <sup>1</sup>Department of Physiotherapy, College of Medical Sciences, University of Maiduguri,  
8 Nigeria

9 <sup>2</sup> Department of Physiotherapy, Jos University Teaching Hospital, Nigeria

10  
11  
12  
13 **\*Correspondence to Dr. Adewale L. Oyeyemi, Department of Physiotherapy, College of**  
14 **Medical Sciences, University of Maiduguri, Nigeria. Email: [alaoyeyemi@yahoo.com](mailto:alaoyeyemi@yahoo.com);**  
15 **Telephone: +234-802-945-8230**

16  
17  
18 **Key words:** Physical activity, measurements, public health, IPAQ, Nigeria

19  
20 **Word counts:** 4338

1  
2  
3  
4  
5  
6  
7  
8  
9  
10  
11  
12  
13  
14  
15  
16  
17  
18  
19  
20  
21  
22  
23  
24  
25  
26  
27  
28  
29  
30  
31  
32  
33  
34  
35  
36  
37  
38  
39  
40  
41  
42  
43  
44  
45  
46  
47  
48  
49  
50  
51  
52  
53  
54  
55  
56  
57  
58  
59  
60

## 33 ABSTRACT

34 **Objectives:** To investigate the reliability and aspect of validity of a modified version of the long  
35 International Physical Activity Questionnaire (Hausa IPAQ-LF) in Nigeria.

36 **Design:** Cross-sectional study, examining the reliability and construct validity of the Hausa  
37 IPAQ-LF compared with anthropometric and biological variables.

38 **Setting:** Metropolitan Maiduguri, the capital city of Borno State in Nigeria.

39 **Participants:** 180 Nigerian adults (50% women) with a mean age of 35.6 (SD=10.3) years,  
40 purposively selected from neighbourhood with diverse socioeconomic status and walkability.

41 **Outcome measures:** Domains (domestic physical activity [PA], occupational PA, leisure-time  
42 PA, active transportation and sitting time) and intensities of PA (vigorous, moderate and  
43 walking) were measured with the Hausa IPAQ-LF on two different occasions, eight days apart.  
44 Outcomes for construct validity were measured BMI, SBP and DBP.

45 **Results:** The Hausa IPAQ-LF demonstrated good test-retest reliability ( $ICC > 0.75$ ) for total PA  
46 ( $ICC = 0.79$ , 95%  $CI = 0.65-0.82$ ), occupational PA ( $ICC = 0.77$ , 95%  $CI = 0.68-0.82$ ), active  
47 transportation ( $ICC = 0.82$ , 95%  $CI = 0.75-0.87$ ) and vigorous intensity activities ( $ICC = 0.82$ , 95%  
48  $CI = 0.76-0.87$ ). Reliability was substantially higher for total PA ( $ICC = 0.80$ ), occupational PA  
49 ( $ICC = 0.78$ ), leisure-time PA ( $ICC = 0.75$ ) and active transportation ( $ICC = 0.80$ ) in men than  
50 women, but domestic PA ( $ICC = 0.38$ ) and sitting time ( $ICC = 0.71$ ) demonstrated substantial  
51 reliability coefficients in women than men. For the construct validity, domestic PA was  
52 significantly related mainly with SBP ( $\rho = -0.27$ ) and DBP ( $\rho = -0.17$ ), and leisure-time PA and  
53 total PA were significantly related only with SBP ( $\rho = -0.16$ ) and BMI ( $\rho = -0.29$ ), respectively.  
54 Similarly, moderate-intensity PA was mainly related with SBP ( $\rho = -0.16$ ,  $p < 0.05$ ) and DBP ( $\rho$   
55  $= -0.21$ ,  $p < 0.01$ ), but vigorous-intensity PA was only related with BMI ( $\rho = -0.11$ ,  $p < 0.05$ ).

56 **Conclusions:** The modified Hausa IPAQ-LF demonstrated sufficient evidence of test-retest  
57 reliability and may be valid for assessing context specific PA behaviours of adults in Nigeria.

1  
2  
3 66 **ARTICLE SUMMARY**  
4 67

5 68 **Strengths and limitations of this study.**  
6 69

- 7 69
- 8 70 ▪ Systematic adaptation and tailoring of items on the original IPAQ-LF to reflect the common  
9 71 PA behaviours of adults in Nigeria.
  - 10 71
  - 11 72 ▪ The first study to describe the cultural adaptation and translations of the IPAQ-LF and  
12 72 explore its psychometric relevance in an African country.  
13 73
  - 14 73
  - 15 74 ▪ Findings establish evidence to support the feasibility of using a modified IPAQ-LF to  
16 74 reliably collect context specific PA behaviours of adults in the African region.  
17 75
  - 18 75
  - 19 76 ▪ Exploring construct validity through the relationships of PA with BMI and resting blood  
20 76 pressure was an important limitation of this study.  
21 77
  - 22 77
  - 23 78 ▪ The use of non-probability sampling technique may limit generalizability of findings to other  
24 78 samples of Nigerian adults with different characteristics from the study's sample.  
25 79
  - 26 80
  - 27 81
  - 28 82
  - 29 83
  - 30 84
  - 31 84
  - 32 85
  - 33 86
  - 34 87
  - 35 88
  - 36 89
  - 37 90
  - 38 90
  - 39 91
  - 40 92
  - 41 93
  - 42 94
  - 43 94
  - 44 95
  - 45 96
  - 46 97
  - 47 98
  - 48 99
  - 49 99
  - 50 100
  - 51 101
  - 52 102
  - 53 103
  - 54 104
  - 55 105
  - 56 105
  - 57
  - 58
  - 59
  - 60



## 106 INTRODUCTION

107  
108 The importance of physical activity (PA) for promoting health and preventing disease is well  
109 established.[1-3] However, for effective health promotion and PA surveillance and monitoring, it  
110 is important to have standardized, reliable and valid instruments that can be used to accurately  
111 describe population levels and patterns of PA within and across countries.[4, 5] In this context,  
112 the international physical activity questionnaire (IPAQ) was developed to obtain internationally  
113 comparable data on health-related PA of adults (18-65 years).[5, 6] Two versions of the IPAQ  
114 that could be administered by interview or self-completed were developed. The short form (SF)  
115 was designed for population surveillance of PA; while the long form (LF) was designed to be  
116 appropriate for use in research that requires detailed information on different PA domains,  
117 including PA at work, household, during leisure and transportation, and time spent in sedentary  
118 activities.[6]

119  
120 The initial evaluation of the IPAQ across 12 countries produced acceptable evidence of  
121 reliability and validity that are as good as other self-report measures of PA.[5] Consequently, in  
122 order to enhance the utility of IPAQ and to further evaluate its psychometrics worldwide, efforts  
123 have been made to translate and adapt the IPAQ in many other countries, but most of the  
124 research in this context were from the Western developed countries.[7-14] In Africa, the  
125 psychometric properties of IPAQ have only been tested in South-Africa as part of the initial  
126 development process of the questionnaire,[5] and in older adults.[15] Because the largest  
127 increases and burden of non-communicable diseases (NCDs) are in the low-income countries  
128 where the understanding of evidence-based strategies for increasing PA remains poor,[16-19]  
129 improving PA research is a top priority for low-income countries.[20] However, to advance PA  
130 research in Africa, it is important to first develop or tailor standardized measures to be culturally  
131 sensitive to PA behaviours of people in the region countries. Because Nigeria is the most  
132 populous country in Africa with culture and languages similar to most of the other West African  
133 countries, it is a good choice to evaluate the IPAQ for cultural and psychometric relevance in this  
134 country.

135

1  
2  
3 136 Recently, a cultural adaptation study of the IPAQ-SF was conducted among adults in  
4  
5 137 Nigeria,[21] with good evidence of test-retest reliability similar to findings in some other  
6  
7 138 studies.[10, 22-24] However, because the IPAQ-SF is not domain specific and does not provide  
8  
9 139 context specific information on PA behaviour, it is important to evaluate the IPAQ-LF for  
10  
11 140 relevance in Nigeria. Psychometric evaluation of a culturally modified version of the IPAQ-LF  
12  
13 141 in sub-Saharan African countries can impact PA research and surveillance in the African region  
14  
15 142 where the prevalence of inactivity related NCDs is on the increase.[20, 25] The aim of the  
16  
17 143 present study was to investigate the reliability and an aspect of validity of a modified version of  
18  
19 144 the IPAQ-LF among adults in Nigeria.  
20

## 21 146 **METHODS**

### 24 148 **Participants**

26 149 A purposive sample of 180 adults from eight neighbourhoods that varied in socioeconomic status  
27  
28 150 and walkability in Maiduguri city were recruited for the study. The sampling and neighbourhood  
29  
30 151 selection strategy have been described in details elsewhere.[26] Maiduguri with an estimated  
31  
32 152 population of 749,123 people is the largest and capital city of Borno State in North-Eastern  
33  
34 153 Nigeria.[27] The city attracts immigrants from neighbouring countries of Cameroon, Niger and  
35  
36 154 Chad Republic, and Hausa language is the common means of communication for commercial  
37  
38 155 activities among the diverse inhabitants of Maiduguri.[27, 28] Participants were eligible for this  
39  
40 156 study if they were willing to self-complete a written survey twice in either Hausa or English  
41  
42 157 Language. However, researchers (UMB and STP) were in attendance to provide translation and  
43  
44 158 interpretation assistance to participants (n=11) who were unable to independently complete the  
45  
46 159 survey. Additional eligibility criteria included living within the identified neighbourhood  
47  
48 160 categories in the last 12 months, being adults (18-65 years) and not having any disability that  
49  
50 161 prevented independent walking. All participants were fully informed of the study protocol and  
51  
52 162 provided signed informed consent. The study protocol was approved by the Research and Ethic  
53  
54 163 Committee of the University of Maiduguri Teaching Hospital, Maiduguri, Nigeria. Data were  
55  
56 164 collected between March and May, 2012.  
57  
58  
59  
60

1  
2  
3 166 **Measures**

4  
5 167 *The adapted international physical activity questionnaire- long Hausa version*

6  
7 168 The cultural adaptation, translation and back translation of the Hausa version of IPAQ-LF is  
8  
9 169 similar to that of the Hausa IPAQ-SF that has been described in details elsewhere.[21] Briefly,  
10  
11 170 interviews were conducted with public health experts, exercise scientists and not highly educated  
12  
13 171 local people to identify the items and examples of PA on the original questionnaires that needed  
14  
15 172 to be culturally adapted. Several cultural adaptations were made to the original items to reflect  
16  
17 173 the reality in Nigeria. First, adjustments to English words like vigorous and moderate activity  
18  
19 174 that can be misunderstood and not associated with PA behaviours in Nigeria were replaced with  
20  
21 175 words that are more representative of the language used in Nigeria, like ‘very hard’ and ‘hard’  
22  
23 176 respectively. Second, examples of various intensities of activity that were common in the  
24  
25 177 Nigerian culture were added, and those already on the questionnaire but not common in the  
26  
27 178 Nigerian context were replaced with culturally applicable examples that are equivalent in energy  
28  
29 179 intensity (METs) with the original items and examples. Third, concepts like physical activity and  
30  
31 180 walking for transportation that were misconstrued outside the health context were refined to  
32  
33 181 indicate they were referring to health behaviours.

34  
35 182  
36  
37 183 After adaptation, the questionnaire was independently translated from English into Hausa  
38  
39 184 language by two native speakers of Hausa who also speaks English, and able to read and write in  
40  
41 185 both languages. One of the translators was familiar with the questionnaire and the second was an  
42  
43 186 expert in Hausa language. The translated questionnaires were mutually revised by the translators  
44  
45 187 and the research team for consistency and then back translated into English language by a third  
46  
47 188 bilingual person who was familiar with the construct measured by IPAQ. The back translated  
48  
49 189 version was checked by the research team for any discrepancies and to ensure that the construct  
50  
51 190 measures by IPAQ had not been lost during the adaptation and translation process.

52  
53 191  
54  
55 192 The modified questionnaire (available in both Hausa and English language), hereafter referred to  
56  
57 193 as the Hausa version of the long international physical activity questionnaire (Hausa IPAQ-LF),  
58  
59 194 contains thirty-one questions that asked about physical activity done in the last 7-days in terms of  
60  
195 frequency (days/week) and duration (minutes/day) spent in four activity domains (transportation,

1  
2  
3 196 occupation, domestic and leisure time), and included sections on walking, moderate- and  
4  
5 197 vigorous- intensity activities, and time spent in sedentary behaviours (sitting during leisure and  
6  
7 198 motorized transportation). The Hausa IPAQ-LF data were presented as the MET-minute/week  
8  
9 199 for total walking, moderate, and vigorous intensity activity and overall physical activity across  
10  
11 200 the four domains, and in each of the domains. The MET intensity values used to score the Hausa  
12  
13 201 IPAQ-LF questions in this study were 8 METs for vigorous activity, 4 METs for moderate  
14  
15 202 activity and 3.3 METs for walking,[2, 6] One MET represents the energy expended while sitting  
16  
17 203 quietly at rest and is equivalent to 3.5 ml/kg/min of  $VO_2$  Max.[3] To assess the test-retest  
18  
19 204 reliability of the Hausa IPAQ-LF, participants self-completed all items on the measure twice,  
20  
21 205 with an interval of one week between administrations.

22

### 23 207 *Anthropometrical and biological measurements*

24  
25 208 Body weight (to nearest 0.5 kg) and Height (to nearest 0.1 cm) were measured in light clothing  
26  
27 209 using a digital scale and stadiometer. Body mass index (BMI) was calculated as body weight  
28  
29 210 divided by the square of height ( $kg/m^2$ ). The principal cutoff points as recommended by WHO  
30  
31 211 were used to create the categories: underweight ( $< 18.5 kg/m^2$ ), normal weight ( $18.5- < 25$   
32  
33 212  $kg/m^2$ ), overweight ( $25- < 30 kg/m^2$ ) and obese ( $\geq 30 kg/m^2$ ).[29] Resting blood pressure and heart  
34  
35 213 rate were measured with Digital Sphygmomanometer (Diagnostic Advanced Wrist Blood  
36  
37 214 Pressure Monitor, Model 6016, USA). Body mass index and resting diastolic blood pressure  
38  
39 215 (DBP) have previously been used for validating the IPAQ.[7,24] Similarly, for this study,  
40  
41 216 construct validity was evaluated by investigating the relationship of outcomes from the Hausa  
42  
43 217 IPAQ-LF with anthropometric (BMI) and biological (SBP and DBP) measurements, and also in  
44  
45 218 part by comparing the differences in time spent in PA and sitting across sociodemographic  
46  
47 219 subgroups. These types of validation for PA measures have been referred as indirect or construct  
48  
49 220 validity in previous studies.[7,24,30]

221

### 222 222 *Sociodemographic Characteristics*

223  
224 Information on age, gender, marital status, religion, income, educational level and employment  
225  
226 status were elicited from the participants. Marital status was classified as married or not married.  
227  
228 Educational level was classified as more than secondary school education, secondary school  
229  
230

1  
2  
3 226 education and less than secondary school education. Employment status was classified into white  
4  
5 227 collar (government or private employed), blue collar (self- employed, trader, artisan etc) and  
6  
7 228 unemployed (homemaker, student, retired, or unable to find job).  
8

9  
10 229

### 11 230 **Data Analysis**

12  
13 231 Descriptive data were reported as mean, standard deviation and percentages. Mean group  
14  
15 232 differences for continuous variables by gender were examined by independent t-test, and for  
16  
17 233 dichotomous variables by chi-square statistics. The reliability analyses were performed using 2  
18  
19 234 strategies. First, the two- way mixed model (single measure) intraclass correlation coefficient  
20  
21 235 (ICC) with 95% confidence interval (CI) between the continuous scores obtained on 1<sup>st</sup> and 2<sup>nd</sup>  
22  
23 236 administration of the Hausa IPAQ-LF was calculated. The ICCs were calculated overall, and by  
24  
25 237 gender and socioeconomic status. ICC estimates >0.75 were considered as good reliability  
26  
27 238 scores, between 0.50 and 0.75 as moderate reliability and <0.50 as poor reliability.[31] Second,  
28  
29 239 the Bland and Altman Method was used to assess agreement on scores of PA from the 1<sup>st</sup> and 2<sup>nd</sup>  
30  
31 240 administrations.[32] Variables used for the Bland and Altman analysis were weekly time spent in  
32  
33 241 moderate-to-vigorous activity (MVPA), total PA and sitting. MVPA was computed by summing  
34  
35 242 the total minutes/week of reported physical activity of moderate and vigorous- intensities across  
36  
37 243 all four domains. For total PA, the total minutes/week of activities in each domain were summed  
38  
39 244 (total work + total transport + total domestic + total leisure-time min/week scores) to gain an  
40  
41 245 overall estimate of physical activity in a week. Also, the independent t-test and one-Way  
42  
43 246 ANOVA were used as appropriate to compare the time spent (minutes/week) in PA at both  
44  
45 247 administrations across sociodemographic subgroups. To assess construct validity, the non-  
46  
47 248 parametric Spearman correlation coefficients ( $\rho$ ) were utilized to explore the relationship  
48  
49 249 between MET-min/week of PA from the Hausa IPAQ- LF, and resting blood pressure and body  
50  
51 250 mass index. Data were analyzed using Statistical Package for the Social Science (SPSS), version  
52  
53 251 15.0 for windows (SPSS Inc., Chicago, Illinois, USA) and the level of significance was set at  
54  
55 252  $p < 0.05$ .  
56  
57 253

### 54 254 **RESULTS**

1  
2  
3 255 The socio-demographic characteristic of the participants are shown in Table 1. The participants  
4  
5 256 comprised 50% women and men, with a mean age of  $35.6 \pm 10.3$  years and body mass index of  
6  
7 257  $23.8 \pm 3.9\text{kg/m}^2$ . Majority of the participants were married (58.9%, n=106), had more than  
8  
9 258 secondary school education (62.7%, n=111) and were employed (75%, n=117). Compared to  
10  
11 259 men, the women were more likely to be married (71.1% vs 46.7%,  $p=0.001$ ) and unemployed  
12  
13 260 (52.2% vs 17.8%,  $p<0.001$ ), but men were more likely to have more than secondary school  
14  
15 261 education (76.7% vs 48.2%,  $p<0.001$ ).  
16

### 17 263 **Reliability**

18  
19 264 Table 2 shows the test-retest reliability of the modified IPAQ-LF. Overall, reliability coefficients  
20  
21 265 were good (ICC >0.75) for total PA, occupational PA, active transportation and vigorous intensity  
22  
23 266 (very hard) PA. Domestic PA, sitting activity and leisure PA demonstrated moderate reliability  
24  
25 267 (ICC ranges from 0.51- 0.71). While, the reliability coefficients of total PA (ICC=0.80, 95%  
26  
27 268 CI=0.69-0.87), active transportation (ICC=0.83, 95% CI=0.73-0.89), occupational PA  
28  
29 269 (ICC=0.78, 95% CI=0.66-0.85) and leisure time PA (ICC=0.75, 95% CI=0.63-0.84) were  
30  
31 270 substantially higher among men than women, reliability coefficients for domestic PA (ICC=0.38,  
32  
33 271 95%, CI=0.01-0.57) and sitting time (ICC=0.71, 95% CI=0.46-0.85) were higher among women  
34  
35 272 than men. According to the intensity of PA, ICCs range between 0.61 and 0.82, with the lowest  
36  
37 273 value recorded for moderate intensity (hard) PA and the highest value for vigorous intensity  
38  
39 274 (very hard) PA. The reliability coefficients for walking, moderate-intensity (hard) and vigorous  
40  
41 275 intensity (very hard) activities were substantially greater in men than women.  
42

43 276  
44 277 Similarly, socioeconomic status differences were observed in the reliability coefficients of the  
45  
46 278 modified IPAQ-LF (Table 3). Across all domains of PA, reliability coefficients were  
47  
48 279 substantially higher among participants with less than secondary school education (ICC from  
49  
50 280 0.77 [sitting activity] to 0.92 [leisure activity]) compared to those with secondary school  
51  
52 281 education (ICC from 0.28 [active transport] to 0.58 [occupational activity]) and those with higher  
53  
54 282 than secondary school education (ICC from 0.23 [sitting activity] to 0.67[active transport]).  
55  
56 283 While reliability coefficients were higher for overall PA (ICC=0.80, 95% CI=0.71- 0.86), active  
57  
58 284 transport (ICC=0.83, 95% CI=0.74- 0.88), occupational PA (ICC=0.79, 95% CI=0.70- 0.86) and  
59  
60

1  
2  
3 285 leisure-time PA (ICC= 0.79, 95% CI= 0.69- 0.85) among participants that were employed  
4  
5 286 compared to their unemployed counterparts, it was higher for domestic PA (ICC=0.65, 95%  
6  
7 287 CI=0.43- 0.79) and sitting time (ICC= 0.68, 95% CI= 0.36- 0.83) among participants that were  
8  
9 288 unemployed than in the employed subgroup.  
10  
11 289

12 290 Figures 1, 2 and 3 (Bland-Altman plots) illustrate the agreement in the scores (minutes/week) of  
13  
14 291 total PA, MVPA and sitting between the first and second administrations of Hausa IPAQ-LF. For  
15  
16 292 total PA, the mean difference was 106.7 minutes/week, with a wide 95% limits of agreement (-  
17  
18 293 762.2 to 965.6 minutes/week). For MVPA, the mean difference was about one and half hour per  
19  
20 294 week (91.6 minutes/week), and also demonstrating a wide 95% limits of agreement (-744.5 to  
21  
22 295 927.7 minutes/week). For sitting time, the mean difference was small (26 minutes/week) and the  
23  
24 296 95% limits of agreement range from -2178.1 to 2230.9 minutes/week.  
25  
26 297

27 298 Table 4 shows the patterns of PA across sociodemographic subgroups during the first (IPAQ1)  
28  
29 299 and second (IPAQ2) administrations of the modified IPAQ-LF. Overall and across all stratified  
30  
31 300 variables, time spent in PA reported during the first administration tends to be higher than those  
32  
33 301 reported during the second administration. At both time points, men reported significantly  
34  
35 302 ( $p<0.05$ ) higher mean time (minute/week) in active transportation, occupational PA, and leisure-  
36  
37 303 time PA than women. However, women spent significantly ( $p<0.001$ ) more time (minutes/week)  
38  
39 304 in domestic PA than men (IPAQ1=236.9 vs 82.3, IPAQ2=195.5 vs 52.4). For educational status,  
40  
41 305 participants that had lower than secondary school education compared to those with at least  
42  
43 306 secondary school education reported statistically significant higher mean time (minutes/week) at  
44  
45 307 both time points for total PA, active transport, occupational PA, walking and vigorous intensity  
46  
47 308 activity compared to those with at least secondary school education. While participants that were  
48  
49 309 employed reported statistically significant ( $p<0.05$ ) more time (minutes/week) in total PA  
50  
51 310 (IPAQ1=441.1 vs 285.1, IPAQ2=359.4 vs 141.0), active transportation (IPAQ1=43.8 vs 21.1,  
52  
53 311 IPAQ2=36.9 vs 18.3) and work PA (IPAQ1=195.5 vs 41.8, IPAQ2=164.1 vs 40.1) than those  
54  
55 312 who were unemployed, the unemployed reported statistically significant ( $p<0.05$ ) higher time in  
56  
57 313 domestic activity (IPAQ1=210.6 vs 132.1, IPAQ2=205.0 vs 112.6) compared to the employed.  
58  
59 314  
60

### 315 **Construct Validity**

316 Overall, correlations between energy expenditure (MET-Minutes/week) according to the  
317 modified IPAQ-LF and anthropometric and biological measures were statistically significant in  
318 the expected direction for all domains and intensities of PA, except for occupation and active  
319 transport domains and walking (table 5). In the full sample, domestic PA was mainly related with  
320 SBP ( $\rho = -0.27, p < 0.01$ ) and DBP ( $\rho = -0.17, p < 0.05$ ), while leisure PA and total PA were only  
321 related with SBP ( $\rho = -0.16, p < 0.05$ ) and BMI ( $\rho = -0.29, p < 0.01$ ), respectively. Similarly,  
322 moderate-intensity PA was mainly related with SBP ( $\rho = -0.16, p < 0.05$ ) and DBP ( $\rho = -0.21, p <$   
323  $0.01$ ), but vigorous-intensity PA was only related with BMI ( $\rho = -0.11, p < 0.05$ ). In the gender  
324 based analyses, total PA, domestic PA and sedentary time were more consistently related with  
325 anthropometric and biological variables. The strongest rho value (-0.41) was found for the  
326 relationship between total PA and BMI for the male subgroup. The rho values of -0.23 was  
327 reached between total PA and DBP for the women subgroup. Only in women was domestic PA  
328 significantly related with BMI ( $\rho = -0.23$ ), DBP ( $\rho = -0.20$ ) and SBP ( $\rho = -0.31$ ). Leisure-time  
329 PA ( $\rho = -0.39$ ) and occupational PA ( $\rho = -0.22$ ) were significantly related with BMI only in men.  
330 The rho value for the relationship between sitting time and BMI was slightly higher in women ( $\rho$   
331  $= 0.19$ ) than men ( $\rho = 0.15$ ).

332

### 333 **DISCUSSION**

334 This study examined the reliability and an aspect of validity of a modified version of the IPAQ-  
335 LF in Nigeria. The findings generally indicated acceptable test-retest reliability and modest  
336 construct validity for items of the modified IPAQ-LF among Nigerian adults. To the best of our  
337 knowledge, the present study is the only one to examine the reliability and validity of the long  
338 version of IPAQ that has been modified specifically to an indigenous African culture and  
339 language.

340

341 We found evidence for good reliability with high correlations between the test-retest for total  
342 PA, occupational PA, active transportation and vigorous intensity activity. Our results shows that  
343 except for domestic PA and sitting time, ICC values for domains of PA were consistently above  
344 0.70, a level of reproducibility that has been considered acceptably good for IPAQ data.[33,34]



1  
2  
3 345 Similar to a previous IPAQ-LF study in Hong Kong,[34] domestic activity demonstrated the  
4  
5 346 lowest ICC value in our study. However, it is possible that the infrequent nature of household  
6  
7 347 activities undertaken, especially by men may account for the low reliability reported for domestic  
8  
9 348 PA in our study. In addition to the traditional African patriarchal belief that make most African  
10  
11 349 men to rarely engage in indoor household activities, men in the high socioeconomic group in  
12  
13 350 Nigeria may also not engage in outdoor domestic activities like gardening and outdoor home,  
14  
15 351 appliances and equipment maintenance because they are able to employ the services of domestic  
16  
17 352 helpers and repair men. Our findings of lower reliability for domestic activity among men, those  
18  
19 353 with more than secondary school education and those who were employed compared to their  
20  
21 354 counterparts seem to support this assumption.  
22

23 355  
24 356 The highest and strongest reliability coefficients (0.82) were found for both active transportation  
25  
26 357 and vigorous intensity activity. Perhaps, active transportation was more stable, consistent and  
27  
28 358 reproducible overtime than other PA domains because it is a common and ubiquitous PA  
29  
30 359 behaviour in the African region. Mostly, the performance of active transportation especially  
31  
32 360 walking is often out of necessity rather than choice within the African context. Our finding of  
33  
34 361 higher ICC value for vigorous intensity PA is consistent with those of other studies that found  
35  
36 362 the reliability of vigorous intensity activity to be higher compared to that of moderate intensity  
37  
38 363 activity.[10,30,34,35] Compared to structured vigorous physical activities like sports and  
39  
40 364 exercise that can be more easily recalled, moderate intensity PA are often of low salience,  
41  
42 365 incidental and may not easily be remembered by people.[36,37] Further our finding that the  
43  
44 366 reliability of vigorous intensity physical activity was meaningfully higher among men than  
45  
46 367 women seem to confirm our previous findings with the IPAQ-SF.[21] Plausibly men in Nigeria  
47  
48 368 are more consistent than women when responding to PA items that pertained to intense vigorous  
49  
50 369 PA than other intensities of activity. Overall, the moderate to good evidence of reliability found  
51  
52 370 for all items indicates that the modified IPAQ-LF is reproducible, internally consistent and is  
53  
54 371 promising for research in Nigeria.  
55

56 372  
57 373 Except for sitting time, the limits of agreement in the mean scores of total PA and MVPA  
58  
59 374 between the first and second administrations were wide, suggesting an evidence of bias between  
60

1  
2  
3 375 administrations. Large difference in PA scores between the 2 administrations would indicate that  
4  
5 376 at least one of two measurements is not accurate. However, similar to the finding of a Mexican  
6  
7 377 study,[38] scores on the Hausa IPAQ-LF were consistently lower during the second  
8  
9 378 administration of the questionnaire compared to the first administration. Because familiarity with  
10  
11 379 the IPAQ questions may improve over multiple exposures to the questionnaire, it is possible that  
12  
13 380 participants in our study might have over-reported their PA levels during the first administration  
14  
15 381 of the Hausa IPAQ-LF. This kind of findings may have implication for the utility of IPAQ for  
16  
17 382 surveillance. Generally, due to issues of social desirability phenomenon and over reporting of PA  
18  
19 383 that has been associated with the IPAQ,[39,40] it may be necessary to start considering the need  
20  
21 384 for multiple measurements when using the IPAQ for evaluating PA, especially in developing  
22  
23 385 African countries. However, patterns of PA as measured by the modified IPAQ-LF during both  
24  
25 386 administrations were consistently similar, and both administrations were able to discriminate PA  
26  
27 387 in the expected direction between subgroups of our sample. For example, at both measurement  
28  
29 388 time points, and consistent with hypothesis, men reported more time in active transportation,  
30  
31 389 occupational PA and leisure PA than women, while women reported more time in domestic PA  
32  
33 390 and sedentary activity than men.

34  
35 391  
36  
37 392 In the absence of objective criterion standards for evaluating an absolute estimate of PA, the  
38  
39 393 consistency of items on IPAQ with variables known to be related to PA such as body mass index  
40  
41 394 (BMI), blood pressure, heart rate, indicators of lipid and glucose metabolism, and fitness index  
42  
43 395 have been used as important construct validity measures.[7,10,21,24] In the present study, the  
44  
45 396 correlations of the PA domains and intensities with biological and anthropometric variables were  
46  
47 397 mostly significant in the expected direction, but they were low suggesting a modest evidence of  
48  
49 398 construct validity for the modified IPAQ-LF in Nigeria. However, observed correlations were  
50  
51 399 comparable with the values in other studies that have evaluated the IPAQ-LF.[5,7,8,24,30,33,39]  
52  
53 400 Because better validity coefficients have been reported for other PA measures above that of the  
54  
55 401 IPAQ,[39,41] with the present African finding, it is possible that the IPAQ-LF only have modest  
56  
57 402 evidence of construct validity. However, our findings on the relationships between physical  
58  
59 403 activity and biological and anthropometric variables should be interpreted in the light of an  
60  
404 important caution. Because hypertensive and obese people may get oriented to exercise,[3] cross-

1  
2  
3 405 sectional associations of physical activity and blood pressure or BMI could also occur in the  
4  
5 406 opposite direction and may not represent much information as indicators of construct validity of  
6  
7 407 physical activity measures.  
8  
9 408

### 10 409 **Strengths and limitations**

11  
12  
13 410 A strength of this study is the systematic adaptation and tailoring of items on the IPAQ-LF to  
14  
15 411 reflect the common PA behaviours of people in Nigeria. This is the first study in an African  
16  
17 412 country to explore the cultural adaptation and translation of the IPAQ-LF, and its findings  
18  
19 413 demonstrated the feasibility of using the IPAQ-LF to reliably collect PA data in a diverse  
20  
21 414 segment of the Nigerian population. In the Africa region, the importance of a valid and  
22  
23 415 established PA scale like the modified IPAQ-LF is not only important to monitoring the domain  
24  
25 416 in which activity is performed, but also very critical to understanding studies of ecological  
26  
27 417 models of health behaviours, that emphasize the importance of multiple levels of influence on  
28  
29 418 health behaviours including PA.[18,42] In Nigeria, emerging evidence from studies using  
30  
31 419 ecological models indicate that favourable built environmental attributes are promising for  
32  
33 420 improving total and moderate-to-vigorous PA and controlling obesity among adults.[26, 43-45]  
34  
35 421 However, built environment characteristics are expected to be strongly related to specific PA  
36  
37 422 types rather than overall PA.[46,47] For example, different environmental variables can be  
38  
39 423 related to walking for leisure or transportation and to moderate PA for household, occupation,  
40  
41 424 recreation or transportation. Thus, a study of adaptation of the IPAQ-LF is very important to  
42  
43 425 understanding the domain specific nature of ecological model research in the African region.  
44  
45 426 One additional strength was the exploration of PA patterns by gender, educational level and  
46  
47 427 employment status, the findings of which were consistent with general hypothesis on social  
48  
49 428 patterns of inactivity in low-income countries.[20,48]  
50  
51 429

52  
53 430 However, the findings of this study should be interpreted in the light of some important  
54  
55 431 limitations. Direct comparison of our validity findings with previous studies should be made with  
56  
57 432 caution, because unlike in our study, the accelerometer or PA diary were utilized as a common  
58  
59 433 objective criterion standard to validate the IPAQ in the majority of the  
60  
434 studies.[5,7,8,24,30,33,39] Thus, examining the construct validity through the relationships of

1  
2  
3 435 PA with BMI and resting blood pressure was an important limitation of our study. The choice  
4  
5 436 and availability of appropriate criterion measures are particular issues of concern for the  
6  
7 437 validation of PA questionnaires in low-income countries of Africa [5,49,50]. Despite these  
8  
9 438 issues, the validity coefficients in our study were remarkably similar to those reported in other  
10  
11 439 studies, [5,7,8,24,30,33,39] and the consistency of items on IPAQ with variables known to be  
12  
13 440 related to PA such as BMI, blood pressure, heart rate, indicators of lipid and glucose metabolism,  
14  
15 441 and fitness index have previously been used as important construct validity  
16  
17 442 measures.[7,10,21,24] Another limitation of the study is the use of non-probability sampling  
18  
19 443 technique. The study finding may have limited generalizability to other samples of Nigerians that  
20  
21 444 have different characteristics from this sample. In addition, the majority of participants have  
22  
23 445 more than secondary school education with potentially higher comprehension and recall ability  
24  
25 446 than may be found in the general population. Nevertheless, recruitment from diverse  
26  
27 447 neighbourhoods and settings allowed for a sample with reasonable heterogeneity in age,  
28  
29 448 occupational status, and ethnic backgrounds and made it possible to stratify the analyses by  
30  
31 449 sociodemographic characteristics. However, because some of the participants in the present  
32  
33 450 study required assistance to complete the survey, interview administration rather than self-  
34  
35 451 administration of the IPAQ-LF should be encouraged in any future national studies in the  
36  
37 452 African region.

38 453

### 39 454 **Conclusions**

40 455 Overall, the present study suggests that the modified IPAQ-LF demonstrated sufficient evidence  
41  
42 456 of test-retest reliability and may be valid for assessing context specific PA behaviours of adults  
43  
44 457 in Nigeria. Adaptation and criterion evaluation of the IPAQ-LF in other African countries could  
45  
46 458 further contribute to our understanding of the impact of multiple levels of influence on PA  
47  
48 459 behaviours of people in the African region.

49 460

50 461

51 462

52 463

53 464

54

55

56

57

58

59

1  
2  
3 465 **Acknowledgments**

466 The authors are grateful to Mrs. Salamatu U Aliyu and Mr. Sa'adu Inusa Kiriri for their help  
467 with questionnaire translations, and to the participants for their help for taking part in the study.  
468

9 469 **Contributors**

10 470 ALO conceived and designed the study, contributed to cultural adaptation and acquisition of  
11 data, conducted the statistical analysis and interpretation of data and drafted the manuscript.  
12 471 UMB and STP managed participants' recruitment and data collection and contributed to cultural  
13 adaptation. HBN and RDM contributed to cultural adaptation and translations of the measure.  
14 472 AYO contributed to study design, acquisition of data and critically revised the manuscript for  
15 important intellectual contents. All authors read and approved the final manuscript.  
16 473  
17 474  
18 475  
19 476

20 477 **Funding**

21 478 This research received no specific grant from any funding agency in the public, commercial or  
22 not-for-profit sectors.  
23 479  
24 480

25 481 **Competing interests**

26 482 Authors declare there is no competing interest associated with this study.  
27 483  
28 484

29 485 **Ethics approval**

30 486 Research and Ethic Committee of the University of Maiduguri Teaching Hospital, Nigeria  
31 (ADM/TH/EC/75).  
32 487

33 488 **Data sharing process**

34 489 Dataset for this study available upon request from the corresponding author.  
35 490  
36 491  
37 492  
38 493

494 **References**

- 495
- 496 1. Garber CE, Blissmer B, Deschenes MR, *et al.* for the American College of Sports Medicine.  
497 Quantity and quality of exercise for developing and maintaining cardiorespiratory,  
498 musculoskeletal, and neuromotor fitness in apparently healthy adults: guidance for  
499 prescribing exercise. *Med Sci Sports Exerc* 2011;43:1334-1359.
- 500
- 501 2. World Health Organization. Global recommendations on physical activity for health. WHO,  
502 Geneva, Switzerland; 2010.
- 503
- 504 3. Haskell WL, Lee I-M, Pate RP, *et al.* Physical activity and public health: updated  
505 recommendation for adults from the American College of Sports Medicine and the American  
506 Heart Association. *Circulation* 2007;116:1081-1093.
- 507
- 508 4. World Health Assembly 57.17. *Global strategy on diet and physical activity*. Geneva: World  
509 Health Organization. May 2004.
- 510
- 511 5. Craig CL, Marshall, AL, Sjoström M, *et al.* International physical activity questionnaire: 12  
512 country reliability and validity. *Med Sci Sports Exerc* 2003;35(8):1381-1395.
- 513
- 514 6. The IPAQ group. International physical activity questionnaire. 2014 Available at:  
515 <http://www.ipaq.ki.se/scoring.pdf>. Accessed May 21, 2014.
- 516
- 517 7. Hagstromer M, Oja P, Sjoström M. The international physical activity questionnaire (IPAQ)  
518 a study of concurrent and construct validity. *Public Health Nutr* 2006;9:755-762.
- 519
- 520 8. Hagstromer M, Ainsworth BE, Oja P, *et al.* Comparison of a subjective and an objective  
521 measure of physical activity in a population sample. *J Phys Act Health* 2010;7:541-550.
- 522
- 523 9. Maddison R, Mhurchu CN, Jiang Y, *et al.* International physical activity questionnaire  
524 (IPAQ) and New Zealand physical activity questionnaire (NZPAP): A doubly labelled water  
525 validation. *Int J Behav Nutr Phys Act* 2007;4:62.
- 526
- 527 10. Kurtze N, Rangul V, Hustveldt B. Reliability and validity of the international physical  
528 activity questionnaire in the Nord-Trøndelag Health Study (HUNT) population of men. *BMC*  
529 *Med Res Methodol* 2008;8:63.
- 530
- 531 11. Nicaise V, Marshall S, Ainsworth BE. Domain-specific physical activity and self-report bias  
532 among low-income Latinas living in San Diego county. *J Phys Act Health* 2011;8:881-890.
- 533
- 534 12. Vandelanotte C, De Bourdeaudunij I, Philippaerts R, *et al.* Reliability and validity of a  
535 computerized and Dutch version of the International Physical Activity Questionnaire (IPAQ).  
536 *J Phys Act Health* 2005;2;63-75.
- 537

- 1  
2  
3 538 13. Loney T, Standage M, Thompson D, *et al.* Self-Report vs. objectively assessed physical  
4 539 activity: which is right for public health? *J Phys Act Health* 2011;8:62-70.  
5 540  
6 541 14. Mackay LM, Oliver M, Schofield GM. Demographic variations in discrepancies between  
7 542 objective and subjective measures of physical activity. *Open Journal of Preventive Medicine*  
8 543 2011;1:13-19.  
9 544  
10 545 15. Kolbe-Alexander TL, Lambert EV, Harkins JB *et al.* Comparison of two methods of  
11 546 measuring physical activity in South African older adults. *J Aging Phys Act* 2006;14:98-114.  
12 547  
13 548 16. Pratt M, Sarmiento OL, Montes F, *et al.* The implications of megatrends in information and  
14 549 communication technology and transportation for changes in global physical activity. *Lancet*  
15 550 2012;380:282-293.  
16 551  
17 552 17. Kohl 3<sup>rd</sup> HW, Criag CL, Lambert EV, *et al.* for the Lancet physical activity series working  
18 553 group. The pandemic of physical inactivity: global action for public health. *Lancet*  
19 554 2012;380:294-305.  
20 555  
21 556 18. Bauman AE, Reis RS, Sallis JF, *et al.* Correlates of physical activity: why are some physical  
22 557 active and others not? *Lancet* 2012;380:258-271.  
23 558  
24 559 19. Heath GW, Parra DC, Sarmiento OL, *et al.* Evidence-based intervention in physical activity:  
25 560 lessons from around the world. *Lancet* 2012;380:278-281.  
26 561  
27 562 20. Hallal PC, Andersen LB, Bull FC, *et al.* for the Lancet physical activity series working  
28 563 group. Global physical activity levels: surveillance progress, pitfalls, and prospects. *Lancet*  
29 564 2012;380:247-257.  
30 565  
31 566 21. Oyeyemi AL, Oyeyemi AY, Adegoke BOA, *et al.* Cross-cultural adaptation of the  
32 567 international physical activity questionnaire: reliability and validity of the Hausa version in  
33 568 Nigeria. *BMC Med Res Methodol* 2011;11:156.  
34 569  
35 570 22. Chu AH, Moy FM. Reliability and validity of the Malay international physical activity  
36 571 questionnaire (IPAQ-M) among a Malay population in Malaysia. *Asia Pac J Public Health*  
37 572 2013 Apr 17 [Epub ahead of print].  
38 573  
39 574 23. Chun MY. Validity and reliability of Korean version of international physical activity  
40 575 questionnaire short form in the elderly. *Korean J Fam Med* 2012;33:144-151.  
41 576  
42 577 24. Graff-Iversen S, Anderssen SA, Holme IM, *et al.* An adapted version of the long  
43 578 international physical activity questionnaire (IPAQ L): Construct validity in a low income,  
44 579 multiethnic population study from Oslo, Norway. *Int J Behav Nutr Phys Act* 2007;4:13.  
45 580  
46  
47  
48  
49  
50  
51  
52  
53  
54  
55  
56  
57  
58  
59  
60

- 1  
2  
3 581 25. Lee IM, Shiroma EJ, Lobelo F, *et al.* for the Lancet physical activity series working group  
4 582 Effect of physical inactivity on major non-communicable diseases worldwide: an analysis of  
5 583 burden of diseases and life expectancy. *Lancet* 2012;380:219-229.  
6 584  
7 585 26. Oyeyemi AL, Sallis JF, Deforche B, *et al.* Evaluation of the Neighborhood Environment  
8 586 Walkability Scale in Nigeria. *Int J Health Geogr* 2013;12:16.  
9 587  
10 588 27. National Bureau of Statistics. Statistical fact sheet and population census. Federal Republic  
11 589 of Nigeria 2008. Available: <http://www.nigerianstat.gov.ng> Accessed 28 August 2012.  
12 590  
13 591 28. National Population Commission (NPC) [Nigeria] and ORC Macro (2004) Nigeria  
14 592 Demographics and Health Survey 2003. Calverton, Maryland: National Population  
15 593 Commission and ORC Macro  
16 594  
17 595 29. World Health Organization. Obesity: Preventing and Managing the Global Epidemic. WHO  
18 596 Technical Report Series 894. 2000. World Health Organization; 2000. Available:  
19 597 [http://whqlibdoc.who.int/trs/WHO\\_TRS\\_894.pdf](http://whqlibdoc.who.int/trs/WHO_TRS_894.pdf) Accessed 23 August 2013.  
20 598  
21 599 30. Vasheghani-Farahani A, Tahmusbi M, Sheri H, *et al.* The Persian, last 7-day, long form of  
22 600 the International Physical Activity Questionnaire: Translation and validation study. *Asian J*  
23 601 *Sports Med* 2011;2(2)106-116.  
24 602  
25 603 31. Portney L, White M. Foundations of clinical research. Applications to practice. New Jersey:  
26 604 Pearson Education Inc, 2009  
27 605  
28 606 32. Bland JM, Altman DG. Statistical methods for assessing agreement between two methods of  
29 607 clinical measurement. *Lancet*, 1986;1:307-310.  
30 608  
31 609 33. Levy SS, Readdy RT. Reliability of the international physical activity questionnaire in  
32 610 research setting: last 7-day self-administered long form. *Meas Phys Educ Exerc Sci*  
33 611 2009;13:191-205.  
34 612  
35 613 34. Macfarlane D, Chan A, Cerin E. Examining the validity and reliability of the Chinese version  
36 614 of the International Physical Activity Questionnaire, long form (IPAQ-LC). *Public Health*  
37 615 *Nutr* 2010;14(3),443-450.  
38 616  
39 617 35. Papathanasiou G, Georgoudis G, Papandreou M, *et al.* Reliability measures of the short  
40 618 international physical activity questionnaire (IPAQ) in Greek young adults. *Hellenic J*  
41 619 *Cardiol* 2009;50:283-294.  
42 620  
43 621 36. Sallis JF, Saelens BE. Assessment of physical activity by self-report: status, limitations, and  
44 622 future directions. *Res Q Exerc Sport* 2000;71:1-14.  
45 623  
46 624 37. Washburn RA, Heath GW, Jackson AW. Reliability and validity issues concerning large-  
47 625 scale surveillance of physical activity. *Res Q Exerc Sport* 2000;71:104-113.



- 1  
2  
3 626  
4 627 38. Medina C, Barquera S, Janssen I. Validity and reliability of the International Physical  
5 628 Activity Questionnaire among adults in Mexico. *Rev panam salud publica* 2013;34(1):21-28.  
6 629  
7 630 39. Johnson-Kozlow M, Sallis JF, Gilpin EA, *et al.* Comparative validation of the IPAQ and the  
8 631 7-Day PAR among women diagnosed with breast cancer. *Int J Behav Nutr Phys Act*  
9 632 2006;3:7.  
10 633  
11 634 40. Rzewnicki R, Vanden Auweele Y, De Bourdeaudhuij I. Addressing over-reporting on the  
12 635 International Physical Activity Questionnaire (IPAQ) telephone survey with a population  
13 636 sample. *Public Health Nutr* 2003;6:299–305.  
14 637  
15 638 41. Aishworth BE, Macera CA, Jones DA *et al.* Comparison of the 2001 BRFSS and the IPAQ  
16 639 physical activity questionnaire. *Med Sci Sports Exerc* 2006;38(9):1584-1592.  
17 640  
18 641 42. Sallis JF, Owen N, Fisher EB. Ecological models of health behavior. In: Glanz K, Rimer BK,  
19 642 Viswanath K, eds. *Health Behavior and Health Education: Theory, Research, and Practice*,  
20 643 4<sup>th</sup> edn. San Francisco: *Jossey-Bass* 2008, 465-486  
21 644  
22 645 43. Oyeyemi AL, Adegoke BOA, Oyeyemi AY, *et al.* Perceived environmental correlates of  
23 646 physical activity and walking in African young adults. *Am J Health Promot* 2011;25 (5):e10-  
24 647 e19  
25 648  
26 649 44. Oyeyemi AL, Adegoke BOA, Oyeyemi AY, *et al.* Environmental factors associated with  
27 650 overweight among adults in Nigeria. *Int J Behav Nutr Phys Act* 2012, 9:32  
28 651  
29 652 45. Oyeyemi AL, Sallis JF, Adegoke BOA, *et al.* Perception of neighborhood safety is related  
30 653 with physical activity among adults in Nigeria. *BMC Public Health* 2012, 12:294  
31 654  
32 655 46. Giles-Corti B, Timperio A, Bull F, *et al.* Understanding physical activity environmental  
33 656 correlates: increased specificity for ecological models. *Exerc Sports Sci Rev.* 2005; 33  
34 657 (4):175-181.  
35 658  
36 659 47. Sallis JF, Cervero R, Ascher WW, *et al.* An ecological approach to creating active living  
37 660 communities. *Annu Rev Public Health* 2006;27:14.1-14.26  
38 661  
39 662 48. Dumith SC, Hallal PC, Reis RS, Kohl HW 3<sup>rd</sup>. Worldwide prevalence of physical and its  
40 663 association with human development index in 76 countries. *Prev Med* 2011;50:24-28  
41 664  
42 665 49. Oyeyemi AL, Umar M, Ugoche F, *et al.* Accelerometer-determined physical activity and its  
43 666 comparison with the International Physical Activity Questionnaire in a sample of Nigerian adults.  
44 667 *PLoS One*, 2014; 9 (1): e872333  
45 668  
46 669 50. Sobnqwi E, Mbanya JCN, Urwin NC, *et al.* Development and validation of a questionnaire  
47 670 for the assessment of physical activity in epidemiological studies in Sub-Saharan Africa. *Int J*  
48 671 *Epidemiol* 2001;30:1361-1368.

Table 1. Descriptive characteristics of the participants (N=180)

| Variables                          | Total sample<br>(N=180) | Men<br>(n=90, 50%) | Women<br>(n=90, 50%) |
|------------------------------------|-------------------------|--------------------|----------------------|
| <b>Age (years)</b>                 |                         |                    |                      |
| Mean ( $\pm$ SD)                   | 35.6 $\pm$ 10.3         | 35.7 $\pm$ 8.3     | 35.5 $\pm$ 11.9      |
| <b>Marital status (n, %)*</b>      |                         |                    |                      |
| Not Married                        | 74(41.1)                | 48(53.3)           | 26(28.9)             |
| Married                            | 106(58.9)               | 42(46.7)           | 64(71.1)             |
| <b>BMI (Kg/m<sup>2</sup>)</b>      |                         |                    |                      |
| Mean ( $\pm$ SD)                   | 23.8 $\pm$ 3.9          | 23.8 $\pm$ 3.5     | 23.8 $\pm$ 4.4       |
| <b>BMI Category (n, %)</b>         |                         |                    |                      |
| Underweight                        | 14 (7.8)                | 4 (4.4)            | 10 (11.1)            |
| Normal weight                      | 107 (59.4)              | 58 (64.4)          | 49 (54.4)            |
| Overweight/obese                   | 59 (32.8)               | 28 (31.2)          | 31 (34.5)            |
| <b>Ethnicity (n, %)</b>            |                         |                    |                      |
| Hausa/Fulani                       | 21(11.7)                | 10.1(11.1)         | 11(12.2)             |
| Igbo                               | 8(4.4)                  | 5(5.6)             | 3(3.3)               |
| Yoruba                             | 10(5.6)                 | 6(6.7)             | 4(4.4)               |
| Kanuri/Shuwa Arab                  | 44(24.4)                | 23(25.6)           | 21(23.3)             |
| Others                             | 97(53.9)                | 46 (51.1)          | 51(56.7)             |
| <b>Educational level (n, %)*</b>   |                         |                    |                      |
| > Secondary School                 | 111 (62.7)              | 11 (12.2)          | 17(19.5)             |
| Secondary                          | 38 (21.5)               | 10 (11.1)          | 28(32.5)             |
| <Secondary School                  | 28 (15.8)               | 69 (76.7)          | 42(48.2)             |
| <b>Occupational Status (n, %)*</b> |                         |                    |                      |
| Unemployed                         | 63(35)                  | 16(17.8)           | 47(52.2)             |
| Blue Collar                        | 45(25)                  | 28(31.1)           | 17(18.9)             |
| White Collar                       | 72(40)                  | 46(51.1)           | 26(28.9)             |

\*- Significant difference between samples ( $p < 0.05$ )

BMI- Body Mass Index

Table 2: Test-reliability based on intra-class correlation coefficient for Hausa IPAQ– LF, overall and by gender

| PA Measure (MET×min/wk)             | Total (N=180)      |                    |                  | Women (n=90)     | Men (n=90)         |
|-------------------------------------|--------------------|--------------------|------------------|------------------|--------------------|
|                                     | Test 1 (Mean (SD)) | Test 2 (Mean (SD)) | ICC (95%CI)      | ICC (95%CI)      | ICC (95%CI)        |
| Total PA, all domain                | 2160.6 (2691.1)    | 1612.8 (1612.8)    | 0.76 (0.65-0.82) | 0.45 (0.08-0.67) | 0.80 (0.69- 0.87)  |
| Occupation                          | 619.1(1671.5)      | 497.5 (1332.9)     | 0.77 (0.68-0.82) | 0.64 (0.46-0.77) | 0.78 (0.66 -0.85)  |
| Active Transport                    | 468.1 (684.7)      | 440.5 (605.7)      | 0.82 (0.75-0.87) | 0.63 (0.40-0.77) | 0.83 (0.73 - 0.89) |
| Domestic                            | 597.6 (754.6)      | 473.4 (673.7)      | 0.50 (0.32-0.62) | 0.38 (0.01-0.57) | 0.33 (-0.01-0.56)  |
| Leisure                             | 377.0 (1096.3)     | 196.7 (920.2)      | 0.71 (0.60-0.78) | 0.69 (0.53-0.79) | 0.75 (0.63-0.84)   |
| Sitting                             | 2263.0 (715.8)     | 2235.4 (818.9)     | 0.62 (0.42-0.75) | 0.71 (0.46-0.85) | 0.48 (0.06-0.72)   |
| <b>PA by Intensity (MET×min/wk)</b> |                    |                    |                  |                  |                    |
| Walking                             | 613.6 (635.6)      | 534.6 (449.1)      | 0.63 (0.48-0.74) | 0.57 (0.29-0.74) | 0.65 (0.44-0.78)   |
| Moderate                            | 986.9 (1365.9)     | 716.1 (1164.6)     | 0.61 (0.46-0.71) | 0.42 (0.11-0.62) | 0.67 (0.49-0.78)   |
| Vigorous                            | 526.5 (1543.7)     | 394.1 (1431.1)     | 0.82 (0.76-0.87) | 0.55 (0.30-0.71) | 0.86 (0.78-0.91)   |

PA= Physical Activity

MET= Metabolic Energy Turnover

Table 3: Socioeconomic status differences in test- retest reliability of the Hausa IPAQ- LF (N= 180)

| Socioeconomic Status               | Overall PA        | Active Transport  | Occupation PA     | Leisure PA        | Domestic PA      | Sitting           |
|------------------------------------|-------------------|-------------------|-------------------|-------------------|------------------|-------------------|
| <b>Educational Qualification</b>   |                   |                   |                   |                   |                  |                   |
| More than secondary school (n=111) | 0.42 (0.08-0.63)  | 0.67 (0.43-0.78)  | 0.32 (-0.06-0.57) | 0.33 (-0.05-0.57) | 0.58 (0.35-0.73) | 0.23 (-0.63-0.63) |
| Secondary School (n=38)            | 0.55 (0.22-0.74)  | 0.28 (-0.21-0.57) | 0.58 (0.33-0.74)  | 0.54 (0.25-0.71)  | 0.50 (0.19-0.69) | 0.51 (-0.04-0.76) |
| Less than Secondary school (n=28)  | 0.89 (0.67-0.96)  | 0.90 (0.74-0.96)  | 0.82 (0.61-0.92)  | 0.92 (0.83-0.96)  | 0.90 (0.78-0.95) | 0.77 (0.45-0.90)  |
| <b>Employment Category</b>         |                   |                   |                   |                   |                  |                   |
| Employed (117)                     | 0.80 (0.67-0.96)  | 0.83 (0.74-0.88)  | 0.79 (0.70-0.86)  | 0.79 (0.69-0.85)  | 0.36 (0.08-0.56) | 0.56 (0.23-0.75)  |
| Unemployed (63)                    | 0.09 (-8.86-0.56) | 0.68 (0.44-0.82)  | 0.16 (-0.39-0.49) | 0.25 (-0.24-0.55) | 0.65 (0.43-0.79) | 0.68 (0.36-0.80)  |

PA= Physical Activity

Table 4: Differences in time spent in physical activity overall, and by gender and socioeconomic status sub groups

|                                 | Gender             |                  |                    | Education               |                        |                         | Employment            |                         |
|---------------------------------|--------------------|------------------|--------------------|-------------------------|------------------------|-------------------------|-----------------------|-------------------------|
|                                 | Total<br>Mean ± SD | Men<br>Mean ± SD | Women<br>Mean ± SD | >Secondary<br>Mean ± SD | Secondary<br>Mean ± SD | <Secondary<br>Mean ± SD | Employed<br>Mean ± SD | Unemployed<br>Mean ± SD |
| <b>PA by domain (min/wk)</b>    |                    |                  |                    |                         |                        |                         |                       |                         |
| Total PA, all domain            |                    |                  |                    |                         |                        |                         |                       |                         |
| IPAQ1                           | 405.2 (507.8)      | 460.7 (582.9)    | 326.8 (367.8)      | 334.0 (400.8)           | 384.8 (514.8)          | 849.2 (764.1)**         | 441.1 (530.2)         | 285.1 (408.6)*          |
| IPAQ2                           | 308.4 (440.3)      | 319.7 (522.8)    | 291.9 (282.9)      | 285.1 (295.1)           | 184.8 (264.4)          | 803.0 (929.6)**         | 359.4 (481.6)         | 141.0 (185.2)*          |
| Active Transport                |                    |                  |                    |                         |                        |                         |                       |                         |
| IPAQ1                           | 35.8 (89.7)        | 52.4 (127.7)     | 19.5 (17.7)*       | 28.3 (47.7)             | 28.9 (45.02)           | 76.4 (198.7)*           | 43.8 (109.4)          | 21.1 (21.9)*            |
| IPAQ2                           | 30.4 (76.7)        | 41.2 (106.3)     | 19.3 (17.5)*       | 23.6 (30.6)             | 20.3 (30.9)            | 74.3 (182.6)*           | 36.9 (94.1)           | 18.3 (14.7)*            |
| Work                            |                    |                  |                    |                         |                        |                         |                       |                         |
| IPAQ1                           | 160.1 (380.8)      | 217.5 (466.8)    | 79.1 (179.9)*      | 114.8 (291.0)           | 122.9 (365.6)          | 546.7 (615.7)**         | 195.5 (418.8)         | 41.8 (162.2)*           |
| IPAQ2                           | 135.3 (310.3)      | 172.5 (372.8)    | 80.6 (171.9)*      | 104.1 (232.2)           | 160.9 (196.1)          | 531.6 (595.8)**         | 164.1 (341.7)         | 40.1 (133.0)*           |
| Domestic                        |                    |                  |                    |                         |                        |                         |                       |                         |
| IPAQ1                           | 159.6 (202.2)      | 82.3 (120.6)     | 236.9 (235.8)**    | 141.2 (182.4)           | 173.3 (238.5)          | 165.4 (159.4)           | 132.1 (170.7)         | 210.6 (243.8)*          |
| IPAQ2                           | 123.9 (163.9)      | 52.4 (74.9)      | 195.5 (190.1)**    | 131.9 (182.5)           | 107.6 (130.4)          | 147.3 (189.1)           | 112.6 (163.9)         | 205.0 (163.3)*          |
| Leisure                         |                    |                  |                    |                         |                        |                         |                       |                         |
| IPAQ1                           | 62.4 (159.1)       | 75.0 (211.1)     | 10.5 (27.3)**      | 47.0 (97.3)             | 92.7 (209.4)           | 38.2 (160.1)            | 69.7 (157.6)          | 48.7 (162.3)            |
| IPAQ2                           | 30.5 (118.2)       | 50.6 (160.7)     | 10.1 (38.5)**      | 23.4 (51.4)             | 24.7 (91.4)            | 71.5 (256.5)            | 43.1 (143.5)          | 17.0 (28.7)*            |
| Sitting                         |                    |                  |                    |                         |                        |                         |                       |                         |
| IPAQ1                           | 2263.0 (715.8)     | 2188.8 (759.7)   | 2330.7 (674.8)     | 2280.0 (618.7)          | 2433.9 (693.7)         | 2180.9 (760.8)          | 2159.4 (775.9)        | 2337.6 (667.2)          |
| IPAQ2                           | 2235.4 (819.9)     | 2208.7 (916.9)   | 2259.6 (728.1)     | 2420.7 (638.7)          | 2215.3 (663.1)         | 2160.0 (1111.4)         | 2170.6 (870.5)        | 2282.0 (785.5)          |
| <b>PA by Intensity (min/wk)</b> |                    |                  |                    |                         |                        |                         |                       |                         |
| Walking                         |                    |                  |                    |                         |                        |                         |                       |                         |
| IPAQ1                           | 178.5 (221.5)      | 241.1 (271.9)    | 128.2 (100.8)*     | 194.4 (268.1)           | 133.4 (85.6)           | 266.9 (285.4)*          | 192.0 (245.7)         | 133.3 (96.2)*           |
| IPAQ2                           | 142.5 (141.8)      | 148.5 (137.9)    | 133.7 (147.9)      | 151.7 (138.4)           | 103.6(94.7)            | 200.3 (209.1)*          | 150.7 (146.6)         | 115.4 (122.7)           |
| Moderate                        |                    |                  |                    |                         |                        |                         |                       |                         |
| IPAQ1                           | 201.9 (326.9)      | 193.0 (214.5)    | 214.5 (247.8)      | 187.3 (266.5)           | 194.9 (386.5)          | 309.7 (381.7)           | 221.2 (347.4)         | 137.7 (239.9)           |
| IPAQ2                           | 133.9 (238.5)      | 114.2 (276.9)    | 162.7 (165.6)      | 132.9 (177.8)           | 88.0 (197.2)           | 319.0 (482.1)*          | 153.9 (266.2)         | 68.0 (76.4)*            |
| Vigorous                        |                    |                  |                    |                         |                        |                         |                       |                         |
| IPAQ1                           | 94.1 (211.8)       | 123.7 (249.6)    | 52.2 (133.2)*      | 32.9 (81.9)             | 129.5 (208.2)          | 268.0 (459.7)**         | 90.2 (214.6)          | 127.1 (204.6)           |
| IPAQ2                           | 78.4 (206.9)       | 86.8 (227.4)     | 46.2 (73.4)        | 52.2 (140.2)            | 55.2 (127.0)           | 292.8 (461.5)**         | 92.8 (226.9)          | 130.9 (107.8)           |

1 PA= Physical Activity  
2 \*=p<0.05  
3 \*\*=p<0.001  
4  
5  
6  
7  
8  
9

For peer review only

10  
11  
12  
13  
14  
15  
16  
17  
18  
19  
20  
21  
22  
23  
24  
25  
26  
27  
28  
29  
30  
31  
32  
33  
34  
35  
36  
37  
38  
39  
40  
41  
42  
43  
44  
45  
46  
47  
48  
49

Table 5: Construct validity of Hausa IPAQ-LF: Spearman correlations between energy expenditure (MET×min/wk) from Hausa IPAQ– LF, and anthropometric and biological variables (N=180)

| MET×min/wk          | Overall (N = 180) |        |         | Female (n = 90) |         |         | Male (n = 90) |         |       |
|---------------------|-------------------|--------|---------|-----------------|---------|---------|---------------|---------|-------|
|                     | BMI               | DBP    | SBP     | BMI             | DBP     | SBP     | BMI           | DBP     | SBP   |
| <b>PA Domains</b>   |                   |        |         |                 |         |         |               |         |       |
| Total PA            | -0.29**           | -0.17* | -0.09   | -0.09           | -0.23** | -0.04   | -0.41**       | -0.08   | -0.14 |
| Occupation PA       | -0.12             | -0.09  | 0.01    | 0.02            | 0.02    | -0.05   | -0.22**       | -0.17   | -0.08 |
| Active transport PA | -0.05             | -0.04  | -0.01   | -0.10           | -0.13   | -0.02   | -0.04         | -0.02   | -0.80 |
| Domestic PA         | -0.07             | -0.17* | -0.26** | -0.23**         | -0.20*  | -0.31** | 0.04          | -0.14   | -0.04 |
| Leisure PA          | 0.09              | -0.08  | -0.16*  | -0.11           | 0.02    | 0.08    | -0.39**       | -0.12   | -0.06 |
| Sitting             | 0.16              | -0.09  | 0.04    | 0.19            | 0.12    | 0.05    | 0.15          | -0.09   | 0.05  |
| <b>PA Intensity</b> |                   |        |         |                 |         |         |               |         |       |
| Walking             | 0.90              | -0.09  | -0.03   | 0.19            | -0.05   | 0.08    | -0.05         | -0.11   | -0.15 |
| Moderate            | -0.02             | 0.21*  | 0.16*   | 0.02            | -0.14   | -0.08   | 0.02          | -0.25** | -0.16 |
| Vigorous            | -0.11*            | -0.06  | 0.03    | -0.16           | 0.01    | 0.02    | -0.13*        | -0.12   | -0.11 |

MET= Metabolic Energy Turnover

BMI= Body Mass Index

DBP= Diastolic Blood Pressure

SBP= Systolic Blood Pressure

PA= Physical activity

\*=p<0.05,

\*\*=p<0.01

1  
2  
3  
4  
5  
6  
7  
8  
9  
10  
11  
12  
13  
14  
15  
16  
17  
18  
19  
20  
21  
22  
23  
24  
25  
26  
27  
28  
29  
30  
31  
32  
33  
34  
35  
36  
37  
38  
39  
40  
41  
42  
43  
44  
45  
46  
47  
48  
49  
50  
51  
52  
53  
54  
55  
56  
57  
58  
59  
60

For peer review only



1  
2  
3 1 **Examining the reliability and validity of a modified version of the International Physical**  
4 **Activity Questionnaire, long form (IPAQ-L) in Nigeria: A cross-sectional study**  
5  
6  
7  
8

9 4 Adewale L. Oyeyemi\*<sup>1</sup>, Umar M. Bello<sup>1</sup>, Saratu T. Philemon<sup>2</sup>, Habeeb N. Aliyu<sup>1</sup>, Rebecca W.  
10 Majidadi<sup>1</sup>, Adetoyeje Y. Oyeyemi<sup>1</sup>  
11  
12  
13

14 7 <sup>1</sup>Department of Physiotherapy, College of Medical Sciences, University of Maiduguri,  
15 Nigeria  
16

17 9 <sup>2</sup> Department of Physiotherapy, Jos University Teaching Hospital, Nigeria  
18  
19  
20  
21  
22

23 13 \*Correspondence to Dr. Adewale L. Oyeyemi, Department of Physiotherapy, College of  
24 14 Medical Sciences, University of Maiduguri, Nigeria. Email: [alaoyeyemi@yahoo.com](mailto:alaoyeyemi@yahoo.com);  
25 15 Telephone: +234-802-945-8230  
26  
27  
28  
29  
30

31 18 **Key words:** Physical activity, measurements, public health, IPAQ, Nigeria  
32  
33  
34

35 20 **Word counts:** 4338  
36  
37  
38  
39  
40  
41  
42  
43  
44  
45  
46  
47  
48  
49  
50  
51  
52  
53  
54  
55  
56  
57  
58  
59  
60

1  
2  
3 33 **ABSTRACT**  
4

5 34 **Objectives:** To investigate the reliability and **aspect of** validity of a modified version of the long  
6  
7 35 International Physical Activity Questionnaire (Hausa IPAQ-LF) in Nigeria.

8  
9 36 **Design:** Cross-sectional study, examining the reliability and construct validity of the Hausa  
10  
11 37 IPAQ-LF compared with anthropometric and biological variables.

12 38 **Setting:** Metropolitan Maiduguri, the capital city of Borno State in Nigeria.

13  
14 39 **Participants:** 180 Nigerian adults (50% women) with a mean age of 35.6 (SD=10.3) years,  
15  
16 40 purposively selected from neighbourhood with diverse socioeconomic status and walkability.

17  
18 41 **Outcome measures:** Domains (domestic **physical activity** [PA], occupational PA, leisure-time  
19  
20 42 PA, active transportation and sitting time) and intensities of PA (vigorous, moderate and  
21  
22 43 walking) were measured with the Hausa IPAQ-LF on two different occasions, eight days apart.  
23  
24 44 Outcomes for construct validity were measured BMI, SBP and DBP.

25 45 **Results:** The Hausa IPAQ-LF demonstrated good test-retest reliability (ICC>75) for total PA  
26  
27 46 (ICC=0.79, 95% CI=0.65-0.82), occupational PA (ICC=0.77, 95% CI=0.68-0.82), active  
28  
29 47 transportation (ICC=0.82, 95% CI=0.75-0.87) and vigorous intensity activities (ICC=0.82, 95%  
30  
31 48 CI=0.76-0.87). Reliability was substantially higher for total PA (ICC=0.80), occupational PA  
32  
33 49 (ICC=0.78), leisure-time PA (ICC=0.75) and active transportation (ICC=0.80) in men than  
34  
35 50 women, but domestic PA (ICC=0.38) and sitting time (ICC=0.71) demonstrated substantial  
36  
37 51 reliability coefficients in women than men. For the construct validity, domestic PA was  
38  
39 52 significantly related mainly with SBP ( $\rho = -0.27$ ) and DBP ( $\rho = -0.17$ ), and leisure-time PA and  
40  
41 53 total PA were significantly related only with SBP ( $\rho = -0.16$ ) and BMI ( $\rho = -0.29$ ), respectively.  
42  
43 54 Similarly, moderate-intensity PA was mainly related with SBP ( $\rho = -0.16$ ,  $p < 0.05$ ) and DBP ( $\rho$   
44  
45 55 =  $-0.21$ ,  $p < 0.01$ ), but vigorous-intensity PA was only related with BMI ( $\rho = -0.11$ ,  $p < 0.05$ ).

46 56 **Conclusions:** The modified Hausa IPAQ-LF demonstrated sufficient evidence of test-retest  
47  
48 57 reliability and may be valid for assessing context specific PA behaviours of adults in Nigeria.  
49  
50 58  
51 59  
52 60  
53 61  
54 62  
55 63  
56 64  
57 65

1  
2  
3 66 **ARTICLE SUMMARY**  
4 67

5 68 **Strengths and limitations of this study.**  
6 69

- 7 70
- 8 70 ■ Systematic adaptation and tailoring of items on the original IPAQ-LF to reflect the common  
9 71 PA behaviours of adults in Nigeria.
  - 10 71
  - 11 72 ■ The first study to describe the cultural adaptation and translations of the IPAQ-LF and  
12 72 explore its psychometric relevance in an African country.
  - 13 73
  - 14 73
  - 15 74 ■ Findings establish evidence to support the feasibility of using a modified IPAQ-LF to  
16 74 reliably collect context specific PA behaviours of adults in the African region.
  - 17 75
  - 18 75
  - 19 76 ■ Exploring construct validity through the relationships of PA with BMI and resting blood  
20 76 pressure was an important limitation of this study.
  - 21 77
  - 22 77
  - 23 78 ■ The use of non-probability sampling technique may limit generalizability of findings to other  
24 78 samples of Nigerian adults with different characteristics from the study's sample.
  - 25 79
  - 26 80
  - 27 81
  - 28 82
  - 29 83
  - 30 84
  - 31 85
  - 32 86
  - 33 87
  - 34 88
  - 35 89
  - 36 90
  - 37 91
  - 38 92
  - 39 93
  - 40 94
  - 41 95
  - 42 96
  - 43 97
  - 44 98
  - 45 99
  - 46 100
  - 47 101
  - 48 102
  - 49 103
  - 50 104
  - 51 105
  - 52
  - 53
  - 54
  - 55
  - 56
  - 57
  - 58
  - 59
  - 60

## 106 INTRODUCTION

107  
108 The importance of physical activity (PA) for promoting health and preventing disease is well  
109 established.[1-3] However, for effective health promotion and PA surveillance and monitoring, it  
110 is important to have standardized, reliable and valid instruments that can be used to accurately  
111 describe population levels and patterns of PA within and across countries.[4, 5] In this context,  
112 the international physical activity questionnaire (IPAQ) was developed to obtain internationally  
113 comparable data on health-related PA of adults (18-65 years).[5, 6] Two versions of the IPAQ  
114 that could be administered by interview or self-completed were developed. The short form (SF)  
115 was designed for population surveillance of PA; while the long form (LF) was designed to be  
116 appropriate for use in research that requires detailed information on different PA domains,  
117 including PA at work, household, during leisure and transportation, and time spent in sedentary  
118 activities.[6]

119  
120 The initial evaluation of the IPAQ across 12 countries produced acceptable evidence of  
121 reliability and validity that are as good as other self-report measures of PA.[5] Consequently, in  
122 order to enhance the utility of IPAQ and to further evaluate its psychometrics worldwide, efforts  
123 have been made to translate and adapt the IPAQ in many other countries, but most of the  
124 research in this context were from the Western developed countries.[7-14] In Africa, the  
125 psychometric properties of IPAQ have only been tested in South-Africa as part of the initial  
126 development process of the questionnaire,[5] and in older adults.[15] Because the largest  
127 increases and burden of non-communicable diseases (NCDs) are in the low-income countries  
128 where the understanding of evidence-based strategies for increasing PA remains poor,[16-19]  
129 improving PA research is a top priority for low-income countries.[20] However, to advance PA  
130 research in Africa, it is important to first develop or tailor standardized measures to be culturally  
131 sensitive to PA behaviours of people in the region countries. Because Nigeria is the most  
132 populous country in Africa with culture and languages similar to most of the other West African  
133 countries, it is a good choice to evaluate the IPAQ for cultural and psychometric relevance in this  
134 country.

135

1  
2  
3 136 Recently, a cultural adaptation study of the IPAQ-SF was conducted among adults in  
4  
5 137 Nigeria,[21] with good evidence of test-retest reliability similar to findings in some other  
6  
7 138 studies.[10, 22-24] However, because the IPAQ-SF is not domain specific and does not provide  
8  
9 139 context specific information on PA behaviour, it is important to evaluate the IPAQ-LF for  
10  
11 140 relevance in Nigeria. Psychometric evaluation of a culturally modified version of the IPAQ-LF  
12  
13 141 in sub-Saharan African countries can impact PA research and surveillance in the African region  
14  
15 142 where the prevalence of inactivity related NCDs is on the increase.[20, 25] The aim of the  
16  
17 143 present study was to investigate the reliability and an aspect of validity of a modified version of  
18  
19 144 the IPAQ-LF among adults in Nigeria.  
20

## 21 146 **METHODS**

### 24 148 **Participants**

25  
26 149 A purposive sample of 180 adults from eight neighbourhoods that varied in socioeconomic status  
27  
28 150 and walkability in Maiduguri city were recruited for the study. The **sampling and** neighbourhood  
29  
30 151 selection strategy **have** been described in details elsewhere.[26] Maiduguri with an estimated  
31  
32 152 population of 749,123 people is the largest and capital city of Borno State in North-Eastern  
33  
34 153 Nigeria.[27] The city attracts immigrants from neighbouring countries of Cameroon, Niger and  
35  
36 154 Chad Republic, and Hausa language is the common means of communication for commercial  
37  
38 155 activities among the diverse inhabitants of Maiduguri.[27, 28] Participants were eligible for this  
39  
40 156 study if they were willing to **self-complete** a written survey twice in **either Hausa or** English  
41  
42 157 Language. **However, researchers (UMB and STP) were in attendance to provide translation and**  
43  
44 158 **interpretation assistance to participants (n=11) who were unable to independently complete the**  
45  
46 159 **survey.** Additional eligibility criteria included living within the identified neighbourhood  
47  
48 160 categories in the last 12 months, being adults (18-65 years) and not having any disability that  
49  
50 161 prevented independent walking. All participants were fully informed of the study protocol and  
51  
52 162 provided **signed** informed consent. The study protocol was approved by the Research and Ethic  
53  
54 163 Committee of the University of Maiduguri Teaching Hospital, Maiduguri, Nigeria. Data were  
55  
56 164 collected between March and May, 2012.  
57  
58  
59  
60

1  
2  
3 166 **Measures**

4  
5 167 *The adapted international physical activity questionnaire- long Hausa version*

6  
7 168 The cultural adaptation, translation and back translation of the Hausa version of IPAQ-LF is  
8  
9 169 similar to that of the Hausa IPAQ-SF that has been described in details elsewhere.[21] Briefly,  
10  
11 170 interviews were conducted with public health experts, exercise scientists and not highly educated  
12  
13 171 local people to identify the items and examples of PA on the original questionnaires that needed  
14  
15 172 to be culturally adapted. Several cultural adaptations were made to the original items to reflect  
16  
17 173 the reality in Nigeria. First, adjustments to English words like vigorous and moderate activity  
18  
19 174 that can be misunderstood and not associated with PA behaviours in Nigeria were replaced with  
20  
21 175 words that are more representative of the language used in Nigeria, like ‘very hard’ and ‘hard’  
22  
23 176 respectively. Second, examples of various intensities of activity that were common in the  
24  
25 177 Nigerian culture were added, and those already on the questionnaire but not common in the  
26  
27 178 Nigerian context were replaced with culturally applicable examples that are equivalent in energy  
28  
29 179 intensity (METs) with the original items and examples. Third, concepts like physical activity and  
30  
31 180 walking for transportation that were misconstrued outside the health context were refined to  
32  
33 181 indicate they were referring to health behaviours.

34  
35 182  
36  
37 183 After adaptation, the questionnaire was independently translated from English into Hausa  
38  
39 184 language by two native speakers of Hausa who also speaks English, and able to read and write in  
40  
41 185 both languages. One of the translators was familiar with the questionnaire and the second was an  
42  
43 186 expert in Hausa language. The translated questionnaires were mutually revised by the translators  
44  
45 187 and the research team for consistency and then back translated into English language by a third  
46  
47 188 bilingual person who was familiar with the construct measured by IPAQ. The back translated  
48  
49 189 version was checked by the research team for any discrepancies and to ensure that the construct  
50  
51 190 measures by IPAQ had not been lost during the adaptation and translation process.

52  
53 191  
54  
55 192 The modified questionnaire (**available in both Hausa and English language**), hereafter referred to  
56  
57 193 as the Hausa version of the long international physical activity questionnaire (Hausa IPAQ-LF),  
58  
59 194 contains thirty-one questions that asked about physical activity done in the last 7-days in terms of  
60  
195 frequency (days/week) and duration (minutes/day) spent in four activity domains (transportation,

1  
2  
3 196 occupation, domestic and leisure time), and included sections on walking, moderate- and  
4  
5 197 vigorous- intensity activities, and time spent in sedentary behaviours (sitting during leisure and  
6  
7 198 motorized transportation). The Hausa IPAQ-LF data were presented as the MET-minute/week  
8  
9 199 for total walking, moderate, and vigorous intensity activity and overall physical activity across  
10  
11 200 the four domains, and in each of the domains. The MET intensity values used to score the Hausa  
12  
13 201 IPAQ-LF questions in this study were 8 METs for vigorous activity, 4 METs for moderate  
14  
15 202 activity and 3.3 METs for walking,[2, 6] One MET represents the energy expended while sitting  
16  
17 203 quietly at rest and is equivalent to 3.5 ml/kg/min of  $VO_2$  Max.[3] To assess the test-retest  
18  
19 204 reliability of the Hausa IPAQ-LF, participants self-completed all items on the measure twice,  
20  
21 205 with an interval of one week between administrations.

22

### 23 207 *Anthropometrical and biological measurements*

24  
25 208 Body weight (to nearest 0.5 kg) and Height (to nearest 0.1 cm) were measured in light clothing  
26  
27 209 using a digital scale and stadiometer. Body mass index (BMI) was calculated as body weight  
28  
29 210 divided by the square of height ( $kg/m^2$ ). The principal cutoff points as recommended by WHO  
30  
31 211 were used to create the categories: underweight ( $< 18.5 kg/m^2$ ), normal weight ( $18.5- < 25$   
32  
33 212  $kg/m^2$ ), overweight ( $25- < 30 kg/m^2$ ) and obese ( $\geq 30 kg/m^2$ ).[29] Resting blood pressure and heart  
34  
35 213 rate were measured with Digital Sphygmomanometer (Diagnostic Advanced Wrist Blood  
36  
37 214 Pressure Monitor, Model 6016, USA). Body mass index and resting diastolic blood pressure  
38  
39 215 (DBP) have previously been used for validating the IPAQ.[7,24] Similarly, for this study,  
40  
41 216 construct validity was evaluated by investigating the relationship of outcomes from the Hausa  
42  
43 217 IPAQ-LF with anthropometric (BMI) and biological (SBP and DBP) measurements, and also in  
44  
45 218 part by comparing the differences in time spent in PA and sitting across sociodemographic  
46  
47 219 subgroups. These types of validation for PA measures have been referred as indirect or construct  
48  
49 220 validity in previous studies.[7,24,30]

221

### 222 222 *Sociodemographic Characteristics*

223  
224  
225  
226  
227  
228  
229  
230  
231  
232  
233  
234  
235  
236  
237  
238  
239  
240  
241  
242  
243  
244  
245  
246  
247  
248  
249  
250  
251  
252  
253  
254  
255  
256  
257  
258  
259  
260

223 Information on age, gender, marital status, religion, income, educational level and employment  
224 status were elicited from the participants. Marital status was classified as married or not married.  
225 Educational level was classified as more than secondary school education, secondary school

1  
2  
3 226 education and less than secondary school education. Employment status was classified into white  
4  
5 227 collar (government or private employed), blue collar (self- employed, trader, artisan etc) and  
6  
7 228 unemployed (homemaker, student, retired, or unable to find job).  
8  
9

229

### 230 **Data Analysis**

13 231 Descriptive data were reported as mean, standard deviation and percentages. Mean group  
14 232 differences for continuous variables by gender were examined by independent t-test, and for  
15 233 dichotomous variables by chi-square statistics. **The reliability analyses were performed using 2**  
16 234 **strategies. First, the two- way mixed model (single measure) intraclass correlation coefficient**  
17 235 **(ICC) with 95% confidence interval (CI) between the continuous scores obtained on 1<sup>st</sup> and 2<sup>nd</sup>**  
18 236 **administration of the Hausa IPAQ-LF was calculated.** The ICCs were **calculated** overall, and by  
19 237 gender and socioeconomic status. ICC estimates >0.75 were considered as good reliability  
20 238 scores, between 0.50 and 0.75 as moderate reliability and <0.50 as poor reliability.[31] **Second,**  
21 239 **the Bland and Altman Method was used to assess agreement on scores of PA from the 1<sup>st</sup> and 2<sup>nd</sup>**  
22 240 **administrations.[32] Variables used for the Bland and Altman analysis were weekly time spent in**  
23 241 **moderate-to-vigorous activity (MVPA), total PA and sitting. MVPA was computed by summing**  
24 242 **the total minutes/week of reported physical activity of moderate and vigorous- intensities across**  
25 243 **all four domains. For total PA, the total minutes/week of activities in each domain were summed**  
26 244 **(total work + total transport + total domestic + total leisure-time min/week scores) to gain an**  
27 245 **overall estimate of physical activity in a week. Also, the independent t-test and one-Way**  
28 246 **ANOVA were used as appropriate to compare the time spent (minutes/week) in PA at both**  
29 247 **administrations** across sociodemographic subgroups. To assess construct validity, the non-  
30 248 parametric Spearman correlation coefficients ( $\rho$ ) were utilized to explore the relationship  
31 249 between MET-min/week of PA from the Hausa IPAQ- LF, and resting blood pressure and body  
32 250 mass index. Data were analyzed using Statistical Package for the Social Science (SPSS), version  
33 251 15.0 for windows (SPSS Inc., Chicago, Illinois, USA) and the level of significance was set at  
34 252  $p < 0.05$ .  
35  
36  
37  
38  
39  
40  
41  
42  
43  
44  
45  
46  
47  
48  
49  
50  
51

253

### 54 **RESULTS**



1  
2  
3 255 The socio-demographic characteristic of the participants are shown in Table 1. The participants  
4  
5 256 comprised 50% women and men, with a mean age of  $35.6 \pm 10.3$  years and body mass index of  
6  
7 257  $23.8 \pm 3.9\text{kg/m}^2$ . Majority of the participants were married (58.9%, n=106), had more than  
8  
9 258 secondary school education (62.7%, n=111) and were employed (75%, n=117). Compared to  
10  
11 259 men, the women were more likely to be married (71.1% vs 46.7%,  $p=0.001$ ) and unemployed  
12  
13 260 (52.2% vs 17.8%,  $p<0.001$ ), but men were more likely to have more than secondary school  
14  
15 261 education (76.7% vs 48.2%,  $p<0.001$ ).  
16

### 17 262 18 263 **Reliability**

19 264 Table 2 shows the test-retest reliability of the modified IPAQ-LF. Overall, reliability coefficients  
20  
21 265 were good (ICC >0.75) for total PA, occupational PA, active transportation and vigorous intensity  
22  
23 266 (very hard) PA. Domestic PA, sitting activity and leisure PA demonstrated moderate reliability  
24  
25 267 (ICC ranges from 0.51- 0.71). While, the reliability coefficients of total PA (ICC=0.80, 95%  
26  
27 268 CI=0.69-0.87), active transportation (ICC=0.83, 95% CI=0.73-0.89), occupational PA  
28  
29 269 (ICC=0.78, 95% CI=0.66-0.85) and leisure time PA (ICC=0.75, 95% CI=0.63-0.84) were  
30  
31 270 substantially higher among men than women, reliability coefficients for domestic PA (ICC=0.38,  
32  
33 271 95%, CI=0.01-0.57) and sitting time (ICC=0.71, 95% CI=0.46-0.85) were higher among women  
34  
35 272 than men. According to the intensity of PA, ICCs range between 0.61 and 0.82, with the lowest  
36  
37 273 value recorded for moderate intensity (hard) PA and the highest value for vigorous intensity  
38  
39 274 (very hard) PA. The reliability coefficients for walking, moderate-intensity (hard) and vigorous  
40  
41 275 intensity (very hard) activities were substantially greater in men than women.  
42

43 276  
44 277 Similarly, socioeconomic status differences were observed in the reliability coefficients of the  
45  
46 278 modified IPAQ-LF (Table 3). Across all domains of PA, reliability coefficients were  
47  
48 279 substantially higher among participants with less than secondary school education (ICC from  
49  
50 280 0.77 [sitting activity] to 0.92 [leisure activity]) compared to those with secondary school  
51  
52 281 education (ICC from 0.28 [active transport] to 0.58 [occupational activity]) and those with higher  
53  
54 282 than secondary school education (ICC from 0.23 [sitting activity] to 0.67[active transport]).  
55  
56 283 While reliability coefficients were higher for overall PA (ICC=0.80, 95% CI=0.71- 0.86), active  
57  
58 284 transport (ICC=0.83, 95% CI=0.74- 0.88), occupational PA (ICC=0.79, 95% CI=0.70- 0.86) and  
59  
60

1  
2  
3 285 leisure-time PA (ICC= 0.79, 95% CI= 0.69- 0.85) among participants that were employed  
4  
5 286 compared to their unemployed counterparts, it was higher for domestic PA (ICC=0.65, 95%  
6  
7 287 CI=0.43- 0.79) and sitting time (ICC= 0.68, 95% CI= 0.36- 0.83) among participants that were  
8  
9 288 unemployed than in the employed subgroup.  
10  
11 289

12 290 **Figures 1, 2 and 3 (Bland-Altman plots) illustrate the agreement in the scores (minutes/week) of**  
13 **total PA, MVPA and sitting between the first and second administrations of Hausa IPAQ-LF. For**  
14 **total PA, the mean difference was 106.7 minutes/week, with a wide 95% limits of agreement (-**  
15 **762.2 to 965.6 minutes/week). For MVPA, the mean difference was about one and half hour per**  
16 **week (91.6 minutes/week), and also demonstrating a wide 95% limits of agreement (-744.5 to**  
17 **927.7 minutes/week). For sitting time, the mean difference was small (26 minutes/week) and the**  
18 **95% limits of agreement range from -2178.1 to 2230.9 minutes/week.**  
19  
20  
21  
22  
23 296  
24  
25 297

26 298 Table 4 shows the patterns of PA across sociodemographic subgroups during the first (IPAQ1)  
27  
28 299 and second (IPAQ2) administrations of the modified IPAQ-LF. Overall and across all stratified  
29  
30 300 variables, time spent in PA reported during the first administration tends to be higher than those  
31  
32 301 reported during the second administration. At both time points, men reported significantly  
33  
34 302 ( $p<0.05$ ) higher mean time (minute/week) in active transportation, occupational PA, and leisure-  
35  
36 303 time PA than women. However, women spent significantly ( $p<0.001$ ) more time (minutes/week)  
37  
38 304 in domestic PA than men (IPAQ1=236.9 vs 82.3, IPAQ2=195.5 vs 52.4). For educational status,  
39  
40 305 participants that had lower than secondary school education compared to those with at least  
41  
42 306 secondary school education reported statistically significant higher mean time (minutes/week) at  
43  
44 307 both time points for total PA, active transport, occupational PA, walking and vigorous intensity  
45  
46 308 activity compared to those with at least secondary school education. While participants that were  
47  
48 309 employed reported statistically significant ( $p<0.05$ ) more time (minutes/week) in total PA  
49  
50 310 (IPAQ1=441.1 vs 285.1, IPAQ2=359.4 vs 141.0), active transportation (IPAQ1=43.8 vs 21.1,  
51  
52 311 IPAQ2=36.9 vs 18.3) and work PA (IPAQ1=195.5 vs 41.8, IPAQ2=164.1 vs 40.1) than those  
53  
54 312 who were unemployed, the unemployed reported statistically significant ( $p<0.05$ ) higher time in  
55  
56 313 domestic activity (IPAQ1=210.6 vs 132.1, IPAQ2=205.0 vs 112.6) compared to the employed.  
57  
58  
59  
60

### 315 **Construct Validity**

316 Overall, correlations between energy expenditure (MET-Minutes/week) according to the  
317 modified IPAQ-LF and anthropometric and biological measures were statistically significant in  
318 the expected direction for all domains and intensities of PA, except for occupation and active  
319 transport domains and walking (table 5). In the full sample, domestic PA was mainly related with  
320 SBP ( $\rho = -0.27$ ,  $p < 0.01$ ) and DBP ( $\rho = -0.17$ ,  $p < 0.05$ ), while leisure PA and total PA were only  
321 related with SBP ( $\rho = -0.16$ ,  $p < 0.05$ ) and BMI ( $\rho = -0.29$ ,  $p < 0.01$ ), respectively. Similarly,  
322 moderate-intensity PA was mainly related with SBP ( $\rho = -0.16$ ,  $p < 0.05$ ) and DBP ( $\rho = -0.21$ ,  $p <$   
323  $0.01$ ), but vigorous-intensity PA was only related with BMI ( $\rho = -0.11$ ,  $p < 0.05$ ). In the gender  
324 based analyses, total PA, domestic PA and sedentary time were more consistently related with  
325 anthropometric and biological variables. The strongest rho value (-0.41) was found for the  
326 relationship between total PA and BMI for the male subgroup. The rho values of -0.23 was  
327 reached between total PA and DBP for the women subgroup. Only in women was domestic PA  
328 significantly related with BMI ( $\rho = -0.23$ ), DBP ( $\rho = -0.20$ ) and SBP ( $\rho = -0.31$ ). Leisure-time  
329 PA ( $\rho = -0.39$ ) and occupational PA ( $\rho = -0.22$ ) were significantly related with BMI only in men.  
330 The rho value for the relationship between sitting time and BMI was slightly higher in women ( $\rho$   
331  $= 0.19$ ) than men ( $\rho = 0.15$ ).

332

### 333 **DISCUSSION**

334 This study examined the reliability and an aspect of validity of a modified version of the IPAQ-  
335 LF in Nigeria. The findings generally indicated acceptable test-retest reliability and modest  
336 construct validity for items of the modified IPAQ-LF among Nigerian adults. To the best of our  
337 knowledge, the present study is the only one to examine the reliability and validity of the long  
338 version of IPAQ that has been modified specifically to an indigenous African culture and  
339 language.

340

341 We found evidence for good reliability with high correlations between the test-retest for total  
342 PA, occupational PA, active transportation and vigorous intensity activity. Our results shows that  
343 except for domestic PA and sitting time, ICC values for domains of PA were consistently above  
344 0.70, a level of reproducibility that has been considered acceptably good for IPAQ data.[33,34]

1  
2  
3 345 Similar to a previous IPAQ-LF study in Hong Kong,[34] domestic activity demonstrated the  
4  
5 346 lowest ICC value in our study. However, it is possible that the infrequent nature of household  
6  
7 347 activities undertaken, especially by men may account for the low reliability reported for domestic  
8  
9 348 PA in our study. In addition to the traditional African patriarchal belief that make most African  
10  
11 349 men to rarely engage in indoor household activities, men in the high socioeconomic group in  
12  
13 350 Nigeria may also not engage in outdoor domestic activities like gardening and outdoor home,  
14  
15 351 appliances and equipment maintenance because they are able to employ the services of domestic  
16  
17 352 helpers and repair men. Our findings of lower reliability for domestic activity among men, those  
18  
19 353 with more than secondary school education and those who were employed compared to their  
20  
21 354 counterparts seem to support this assumption.  
22

23 356 The highest and strongest reliability coefficients (0.82) were found for both active transportation  
24  
25 357 and vigorous intensity activity. Perhaps, active transportation was more stable, consistent and  
26  
27 358 reproducible overtime than other PA domains because it is a common and ubiquitous PA  
28  
29 359 behaviour in the African region. Mostly, the performance of active transportation especially  
30  
31 360 walking is often out of necessity rather than choice within the African context. Our finding of  
32  
33 361 higher ICC value for vigorous intensity PA is consistent with those of other studies that found  
34  
35 362 the reliability of vigorous intensity activity to be higher compared to that of moderate intensity  
36  
37 363 activity.[10,30,34,35] Compared to structured vigorous physical activities like sports and  
38  
39 364 exercise that can be more easily recalled, moderate intensity PA are often of low salience,  
40  
41 365 incidental and may not easily be remembered by people.[36,37] Further our finding that the  
42  
43 366 reliability of vigorous intensity physical activity was meaningfully higher among men than  
44  
45 367 women seem to confirm our previous findings with the IPAQ-SF.[21] Plausibly men in Nigeria  
46  
47 368 are more consistent than women when responding to PA items that pertained to intense vigorous  
48  
49 369 PA than other intensities of activity. Overall, the moderate to good evidence of reliability found  
50  
51 370 for all items indicates that the modified IPAQ-LF is reproducible, internally consistent and is  
52  
53 371 promising for research in Nigeria.  
54

55 372  
56  
57 373 **Except for sitting time, the limits of agreement in the mean scores of total PA and MVPA**  
58  
59 374 **between the first and second administrations were wide, suggesting an evidence of bias between**  
60

1  
2  
3 375 administrations. Large difference in PA scores between the 2 administrations would indicate that  
4  
5 376 at least one of two measurements is not accurate. However, similar to the finding of a Mexican  
6  
7 377 study,[38] scores on the Hausa IPAQ-LF were consistently lower during the second  
8  
9 378 administration of the questionnaire compared to the first administration. Because familiarity with  
10  
11 379 the IPAQ questions may improve over multiple exposures to the questionnaire, it is possible that  
12  
13 380 participants in our study might have over-reported their PA levels during the first administration  
14  
15 381 of the Hausa IPAQ-LF. This kind of findings may have implication for the utility of IPAQ for  
16  
17 382 surveillance. Generally, due to issues of social desirability phenomenon and over reporting of PA  
18  
19 383 that has been associated with the IPAQ,[39,40] it may be necessary to start considering the need  
20  
21 384 for multiple measurements when using the IPAQ for evaluating PA, especially in developing  
22  
23 385 African countries. However, patterns of PA as measured by the modified IPAQ-LF during both  
24  
25 386 administrations were consistently similar, and both administrations were able to discriminate PA  
26  
27 387 in the expected direction between subgroups of our sample. For example, at both measurement  
28  
29 388 time points, and consistent with hypothesis, men reported more time in active transportation,  
30  
31 389 occupational PA and leisure PA than women, while women reported more time in domestic PA  
32  
33 390 and sedentary activity than men.

34  
35 391  
36  
37 392 In the absence of objective criterion standards for evaluating an absolute estimate of PA, the  
38  
39 393 consistency of items on IPAQ with variables known to be related to PA such as body mass index  
40  
41 394 (BMI), blood pressure, heart rate, indicators of lipid and glucose metabolism, and fitness index  
42  
43 395 have been used as important construct validity measures.[7,10,21,24] In the present study, the  
44  
45 396 correlations of the PA domains and intensities with biological and anthropometric variables were  
46  
47 397 mostly significant in the expected direction, but they were low suggesting a modest evidence of  
48  
49 398 construct validity for the modified IPAQ-LF in Nigeria. However, observed correlations were  
50  
51 399 comparable with the values in other studies that have evaluated the IPAQ-LF.[5,7,8,24,30,33,39]  
52  
53 400 Because better validity coefficients have been reported for other PA measures above that of the  
54  
55 401 IPAQ,[39,41] with the present African finding, it is possible that the IPAQ-LF only have modest  
56  
57 402 evidence of construct validity. However, our findings on the relationships between physical  
58  
59 403 activity and biological and anthropometric variables should be interpreted in the light of an  
60  
404 important caution. Because hypertensive and obese people may get oriented to exercise,[3] cross-

1  
2  
3 405 sectional associations of physical activity and blood pressure or BMI could also occur in the  
4  
5 406 opposite direction and may not represent much information as indicators of construct validity of  
6  
7 407 physical activity measures.  
8

9 408

### 10 409 **Strengths and limitations**

11  
12  
13 410 A strength of this study is the systematic adaptation and tailoring of items on the IPAQ-LF to  
14  
15 411 reflect the common PA behaviours of people in Nigeria. This is the first study in an African  
16  
17 412 country to explore the cultural adaptation and translation of the IPAQ-LF, and its findings  
18  
19 413 demonstrated the feasibility of using the IPAQ-LF to reliably collect PA data in a diverse  
20  
21 414 segment of the Nigerian population. In the Africa region, the importance of a valid and  
22  
23 415 established PA scale like the modified IPAQ-LF is not only important to monitoring the domain  
24  
25 416 in which activity is performed, but also very critical to understanding studies of ecological  
26  
27 417 models of health behaviours, that emphasize the importance of multiple levels of influence on  
28  
29 418 health behaviours including PA.[18,42] In Nigeria, emerging evidence from studies using  
30  
31 419 ecological models indicate that favourable built environmental attributes are promising for  
32  
33 420 improving total and moderate-to-vigorous PA and controlling obesity among adults.[26, 43-45]  
34  
35 421 However, built environment characteristics are expected to be strongly related to specific PA  
36  
37 422 types rather than overall PA.[46,47] For example, different environmental variables can be  
38  
39 423 related to walking for leisure or transportation and to moderate PA for household, occupation,  
40  
41 424 recreation or transportation. Thus, a study of adaptation of the IPAQ-LF is very important to  
42  
43 425 understanding the domain specific nature of ecological model research in the African region.  
44  
45 426 One additional strength was the exploration of PA patterns by gender, educational level and  
46  
47 427 employment status, the findings of which were consistent with general hypothesis on social  
48  
49 428 patterns of inactivity in low-income countries.[20,48]  
50

51 429

52 430 However, the findings of this study should be interpreted in the light of some important  
53  
54 431 limitations. Direct comparison of our validity findings with previous studies should be made with  
55  
56 432 caution, because unlike in our study, the accelerometer or PA diary were utilized as a common  
57  
58 433 objective criterion standard to validate the IPAQ in the majority of the  
59  
60 434 studies.[5,7,8,24,30,33,39] Thus, examining the construct validity through the relationships of

1  
2  
3 435 PA with BMI and resting blood pressure was an important limitation of our study. The choice  
4  
5 436 and availability of appropriate criterion measures are particular issues of concern for the  
6  
7 437 validation of PA questionnaires in low-income countries of Africa [5,49,50]. Despite these  
8  
9 438 issues, the validity coefficients in our study were remarkably similar to those reported in other  
10  
11 439 studies, [5,7,8,24,30,33,39] and the consistency of items on IPAQ with variables known to be  
12  
13 440 related to PA such as BMI, blood pressure, heart rate, indicators of lipid and glucose metabolism,  
14  
15 441 and fitness index have previously been used as important construct validity  
16  
17 442 measures.[7,10,21,24] Another limitation of the study is the use of non-probability sampling  
18  
19 443 technique. The study finding may have limited generalizability to other samples of Nigerians that  
20  
21 444 have different characteristics from this sample. In addition, the majority of participants have  
22  
23 445 more than secondary school education with potentially higher comprehension and recall ability  
24  
25 446 than may be found in the general population. Nevertheless, recruitment from diverse  
26  
27 447 neighbourhoods and settings allowed for a sample with reasonable heterogeneity in age,  
28  
29 448 occupational status, and ethnic backgrounds and made it possible to stratify the analyses by  
30  
31 449 sociodemographic characteristics. However, because some of the participants in the present  
32  
33 450 study required assistance to complete the survey, interview administration rather than self-  
34  
35 451 administration of the IPAQ-LF should be encouraged in any future national studies in the  
36  
37 452 African region.

### 37 454 **Conclusions**

38  
39 455 Overall, the present study suggests that the modified IPAQ-LF demonstrated sufficient evidence  
40  
41 456 of test-retest reliability and may be valid for assessing context specific PA behaviours of adults  
42  
43 457 in Nigeria. Adaptation and criterion evaluation of the IPAQ-LF in other African countries could  
44  
45 458 further contribute to our understanding of the impact of multiple levels of influence on PA  
46  
47 459 behaviours of people in the African region.

1  
2  
3 465 **Acknowledgments**

4 466 The authors are grateful to Mrs. Salamatu U Aliyu and Mr. Sa'adu Inusa Kiriri for their help  
5 467 with questionnaire translations, and to the participants for their help for taking part in the study.  
6  
7 468

8  
9  
10 469 **Contributors**

11 470 ALO conceived and designed the study, contributed to cultural adaptation and acquisition of  
12 471 data, conducted the statistical analysis and interpretation of data and drafted the manuscript.  
13 472 UMB and STP managed participants' recruitment and data collection and contributed to cultural  
14 473 adaptation. HBN and RDM contributed to cultural adaptation and translations of the measure.  
15 474 AYO contributed to study design, acquisition of data and critically revised the manuscript for  
16 475 important intellectual contents. All authors read and approved the final manuscript.  
17  
18 476

19  
20  
21 477 **Funding**

22 478 This research received no specific grant from any funding agency in the public, commercial or  
23 479 not-for-profit sectors.  
24  
25 480

26  
27  
28 481 **Competing interests**

29 482 Authors declare there is no competing interest associated with this study.  
30  
31 483

32  
33 484 **Ethics approval**

34 485 Research and Ethic Committee of the University of Maiduguri Teaching Hospital, Nigeria  
35 486 (ADM/TH/EC/75).  
36  
37 487

38  
39 488 **Data sharing process**

40 489 Dataset for this study available upon request from the corresponding author.  
41  
42 490

43  
44  
45 491

46  
47  
48 492

49  
50  
51 493

52  
53  
54  
55  
56  
57  
58  
59  
60



494 **References**

- 495  
496 1. Garber CE, Blissmer B, Deschenes MR, *et al.* for the American College of Sports Medicine.  
497 Quantity and quality of exercise for developing and maintaining cardiorespiratory,  
498 musculoskeletal, and neuromotor fitness in apparently healthy adults: guidance for  
499 prescribing exercise. *Med Sci Sports Exerc* 2011;43:1334-1359.  
500
- 501 2. World Health Organization. Global recommendations on physical activity for health. WHO,  
502 Geneva, Switzerland; 2010.  
503
- 504 3. Haskell WL, Lee I-M, Pate RP, *et al.* Physical activity and public health: updated  
505 recommendation for adults from the American College of Sports Medicine and the American  
506 Heart Association. *Circulation* 2007;116:1081-1093.  
507
- 508 4. World Health Assembly 57.17. *Global strategy on diet and physical activity*. Geneva: World  
509 Health Organization. May 2004.  
510
- 511 5. Craig CL, Marshall, AL, Sjoström M, *et al.* International physical activity questionnaire: 12  
512 country reliability and validity. *Med Sci Sports Exerc* 2003;35(8):1381-1395.  
513
- 514 6. The IPAQ group. International physical activity questionnaire. 2014 Available at:  
515 <http://www.ipaq.ki.se/scoring.pdf>. Accessed May 21, 2014.  
516
- 517 7. Hagstromer M, Oja P, Sjoström M. The international physical activity questionnaire (IPAQ)  
518 a study of concurrent and construct validity. *Public Health Nutr* 2006;9:755-762.  
519
- 520 8. Hagstromer M, Ainsworth BE, Oja P, *et al.* Comparison of a subjective and an objective  
521 measure of physical activity in a population sample. *J Phys Act Health* 2010;7:541-550.  
522
- 523 9. Maddison R, Mhurchu CN, Jiang Y, *et al.* International physical activity questionnaire  
524 (IPAQ) and New Zealand physical activity questionnaire (NZPAP): A doubly labelled water  
525 validation. *Int J Behav Nutr Phys Act* 2007;4:62.  
526
- 527 10. Kurtze N, Rangul V, Hustveldt B. Reliability and validity of the international physical  
528 activity questionnaire in the Nord-Trøndelag Health Study (HUNT) population of men. *BMC*  
529 *Med Res Methodol* 2008;8:63.  
530
- 531 11. Nicaise V, Marshall S, Ainsworth BE. Domain-specific physical activity and self-report bias  
532 among low-income Latinas living in San Diego county. *J Phys Act Health* 2011;8:881-890.  
533
- 534 12. Vandelanotte C, De Bourdeaudunij I, Philippaerts R, *et al.* Reliability and validity of a  
535 computerized and Dutch version of the International Physical Activity Questionnaire (IPAQ).  
536 *J Phys Act Health* 2005;2;63-75.  
537

- 1  
2  
3 538 13. Loney T, Standage M, Thompson D, *et al.* Self-Report vs. objectively assessed physical  
4 539 activity: which is right for public health? *J Phys Act Health* 2011;8:62-70.  
5 540  
6 541 14. Mackay LM, Oliver M, Schofield GM. Demographic variations in discrepancies between  
7 542 objective and subjective measures of physical activity. *Open Journal of Preventive Medicine*  
8 543 2011;1:13-19.  
9 544  
10 545 15. Kolbe-Alexander TL, Lambert EV, Harkins JB *et al.* Comparison of two methods of  
11 546 measuring physical activity in South African older adults. *J Aging Phys Act* 2006;14:98-114.  
12 547  
13 548 16. Pratt M, Sarmiento OL, Montes F, *et al.* The implications of megatrends in information and  
14 549 communication technology and transportation for changes in global physical activity. *Lancet*  
15 550 2012;380:282-293.  
16 551  
17 552 17. Kohl 3<sup>rd</sup> HW, Criag CL, Lambert EV, *et al.* for the Lancet physical activity series working  
18 553 group. The pandemic of physical inactivity: global action for public health. *Lancet*  
19 554 2012;380:294-305.  
20 555  
21 556 18. Bauman AE, Reis RS, Sallis JF, *et al.* Correlates of physical activity: why are some physical  
22 557 active and others not? *Lancet* 2012;380:258-271.  
23 558  
24 559 19. Heath GW, Parra DC, Sarmiento OL, *et al.* Evidence-based intervention in physical activity:  
25 560 lessons from around the world. *Lancet* 2012;380:278-281.  
26 561  
27 562 20. Hallal PC, Andersen LB, Bull FC, *et al.* for the Lancet physical activity series working  
28 563 group. Global physical activity levels: surveillance progress, pitfalls, and prospects. *Lancet*  
29 564 2012;380:247-257.  
30 565  
31 566 21. Oyeyemi AL, Oyeyemi AY, Adegoke BOA, *et al.* Cross-cultural adaptation of the  
32 567 international physical activity questionnaire: reliability and validity of the Hausa version in  
33 568 Nigeria. *BMC Med Res Methodol* 2011;11:156.  
34 569  
35 570 22. Chu AH, Moy FM. Reliability and validity of the Malay international physical activity  
36 571 questionnaire (IPAQ-M) among a Malay population in Malaysia. *Asia Pac J Public Health*  
37 572 2013 Apr 17 [Epub ahead of print].  
38 573  
39 574 23. Chun MY. Validity and reliability of Korean version of international physical activity  
40 575 questionnaire short form in the elderly. *Korean J Fam Med* 2012;33:144-151.  
41 576  
42 577 24. Graff-Iversen S, Anderssen SA, Holme IM, *et al.* An adapted version of the long  
43 578 international physical activity questionnaire (IPAQ L): Construct validity in a low income,  
44 579 multiethnic population study from Oslo, Norway. *Int J Behav Nutr Phys Act* 2007;4:13.  
45 580  
46  
47  
48  
49  
50  
51  
52  
53  
54  
55  
56  
57  
58  
59  
60

- 1  
2  
3 581 25. Lee IM, Shiroma EJ, Lobelo F, *et al.* for the Lancet physical activity series working group  
4 582 Effect of physical inactivity on major non-communicable diseases worldwide: an analysis of  
5 583 burden of diseases and life expectancy. *Lancet* 2012;380:219-229.  
6 584
- 7 585 26. Oyeyemi AL, Sallis JF, Deforche B, *et al.* Evaluation of the Neighborhood Environment  
8 586 Walkability Scale in Nigeria. *Int J Health Geogr* 2013;12:16.  
9 587
- 10 588 27. National Bureau of Statistics. Statistical fact sheet and population census. Federal Republic  
11 589 of Nigeria 2008. Available: <http://www.nigerianstat.gov.ng> Accessed 28 August 2012.  
12 590
- 13 591 28. National Population Commission (NPC) [Nigeria] and ORC Macro (2004) Nigeria  
14 592 Demographics and Health Survey 2003. Calverton, Maryland: National Population  
15 593 Commission and ORC Macro  
16 594
- 17 595 29. World Health Organization. Obesity: Preventing and Managing the Global Epidemic. WHO  
18 596 Technical Report Series 894. 2000. World Health Organization; 2000. Available:  
19 597 [http://whqlibdoc.who.int/trs/WHO\\_TRS\\_894.pdf](http://whqlibdoc.who.int/trs/WHO_TRS_894.pdf) Accessed 23 August 2013.  
20 598
- 21 599 30. Vasheghani-Farahani A, Tahmusbi M, Sheri H, *et al.* The Persian, last 7-day, long form of  
22 600 the International Physical Activity Questionnaire: Translation and validation study. *Asian J*  
23 601 *Sports Med* 2011;2(2)106-116.  
24 602
- 25 603 31. Portney L, White M. Foundations of clinical research. Applications to practice. New Jersey:  
26 604 Pearson Education Inc, 2009  
27 605
- 28 606 32. Bland JM, Altman DG. Statistical methods for assessing agreement between two methods of  
29 607 clinical measurement. *Lancet*, 1986;1:307-310.  
30 608
- 31 609 33. Levy SS, Readdy RT. Reliability of the international physical activity questionnaire in  
32 610 research setting: last 7-day self-administered long form. *Meas Phys Educ Exerc Sci*  
33 611 2009;13:191-205.  
34 612
- 35 613 34. Macfarlane D, Chan A, Cerin E. Examining the validity and reliability of the Chinese version  
36 614 of the International Physical Activity Questionnaire, long form (IPAQ-LC). *Public Health*  
37 615 *Nutr* 2010;14(3),443-450.  
38 616
- 39 617 35. Papathanasiou G, Georgoudis G, Papandreou M, *et al.* Reliability measures of the short  
40 618 international physical activity questionnaire (IPAQ) in Greek young adults. *Hellenic J*  
41 619 *Cardiol* 2009;50:283-294.  
42 620
- 43 621 36. Sallis JF, Saelens BE. Assessment of physical activity by self-report: status, limitations, and  
44 622 future directions. *Res Q Exerc Sport* 2000;71:1-14.  
45 623
- 46 624 37. Washburn RA, Heath GW, Jackson AW. Reliability and validity issues concerning large-  
47 625 scale surveillance of physical activity. *Res Q Exerc Sport* 2000;71:104-113.

- 1  
2  
3 626  
4 627 38. Medina C, Barquera S, Janssen I. Validity and reliability of the International Physical  
5 628 Activity Questionnaire among adults in Mexico. *Rev panam salud publica* 2013;34(1):21-28.  
6 629  
7 630 39. Johnson-Kozlow M, Sallis JF, Gilpin EA, *et al.* Comparative validation of the IPAQ and the  
8 631 7-Day PAR among women diagnosed with breast cancer. *Int J Behav Nutr Phys Act*  
9 632 2006;3:7.  
10 633  
11 634 40. Rzewnicki R, Vanden Auweele Y, De Bourdeaudhuij I. Addressing over-reporting on the  
12 635 International Physical Activity Questionnaire (IPAQ) telephone survey with a population  
13 636 sample. *Public Health Nutr* 2003;6:299–305.  
14 637  
15 638 41. Aishworth BE, Macera CA, Jones DA *et al.* Comparison of the 2001 BRFSS and the IPAQ  
16 639 physical activity questionnaire. *Med Sci Sports Exerc* 2006;38(9):1584-1592.  
17 640  
18 641 42. Sallis JF, Owen N, Fisher EB. Ecological models of health behavior. In: Glanz K, Rimer BK,  
19 642 Viswanath K, eds. *Health Behavior and Health Education: Theory, Research, and Practice*,  
20 643 4<sup>th</sup> edn. San Francisco: Jossey-Bass 2008, 465-486  
21 644  
22 645 43. Oyeyemi AL, Adegoke BOA, Oyeyemi AY, *et al.* Perceived environmental correlates of  
23 646 physical activity and walking in African young adults. *Am J Health Promot* 2011;25 (5):e10-  
24 647 e19  
25 648  
26 649 44. Oyeyemi AL, Adegoke BOA, Oyeyemi AY, *et al.* Environmental factors associated with  
27 650 overweight among adults in Nigeria. *Int J Behav Nutr Phys Act* 2012, 9:32  
28 651  
29 652 45. Oyeyemi AL, Sallis JF, Adegoke BOA, *et al.* Perception of neighborhood safety is related  
30 653 with physical activity among adults in Nigeria. *BMC Public Health* 2012, 12:294  
31 654  
32 655 46. Giles-Corti B, Timperio A, Bull F, *et al.* Understanding physical activity environmental  
33 656 correlates: increased specificity for ecological models. *Exerc Sports Sci Rev.* 2005; 33  
34 657 (4):175-181.  
35 658  
36 659 47. Sallis JF, Cervero R, Ascher WW, *et al.* An ecological approach to creating active living  
37 660 communities. *Annu Rev Public Health* 2006;27:14.1-14.26  
38 661  
39 662 48. Dumith SC, Hallal PC, Reis RS, Kohl HW 3<sup>rd</sup>. Worldwide prevalence of physical and its  
40 663 association with human development index in 76 countries. *Prev Med* 2011;50:24-28  
41 664  
42 665 49. Oyeyemi AL, Umar M, Ugoche F, *et al.* Accelerometer-determined physical activity and its  
43 666 comparison with the International Physical Activity Questionnaire in a sample of Nigerian adults.  
44 667 *PLoS One*, 2014; 9 (1): e872333  
45 668  
46 669 50. Sobnqwi E, Mbanya JCN, Urwin NC, *et al.* Development and validation of a questionnaire  
47 670 for the assessment of physical activity in epidemiological studies in Sub-Saharan Africa. *Int J*  
48 671 *Epidemiol* 2001;30:1361-1368.

Table 1. Descriptive characteristics of the participants (N=180)

| Variables                          | Total sample<br>(N=180) | Men<br>(n=90, 50%) | Women<br>(n=90, 50%) |
|------------------------------------|-------------------------|--------------------|----------------------|
| <b>Age (years)</b>                 |                         |                    |                      |
| Mean ( $\pm$ SD)                   | 35.6 $\pm$ 10.3         | 35.7 $\pm$ 8.3     | 35.5 $\pm$ 11.9      |
| <b>Marital status (n, %)*</b>      |                         |                    |                      |
| Not Married                        | 74(41.1)                | 48(53.3)           | 26(28.9)             |
| Married                            | 106(58.9)               | 42(46.7)           | 64(71.1)             |
| <b>BMI (Kg/m<sup>2</sup>)</b>      |                         |                    |                      |
| Mean ( $\pm$ SD)                   | 23.8 $\pm$ 3.9          | 23.8 $\pm$ 3.5     | 23.8 $\pm$ 4.4       |
| <b>BMI Category (n, %)</b>         |                         |                    |                      |
| Underweight                        | 14 (7.8)                | 4 (4.4)            | 10 (11.1)            |
| Normal weight                      | 107 (59.4)              | 58 (64.4)          | 49 (54.4)            |
| Overweight/obese                   | 59 (32.8)               | 28 (31.2)          | 31 (34.5)            |
| <b>Ethnicity (n, %)</b>            |                         |                    |                      |
| Hausa/Fulani                       | 21(11.7)                | 10.1(11.1)         | 11(12.2)             |
| Igbo                               | 8(4.4)                  | 5(5.6)             | 3(3.3)               |
| Yoruba                             | 10(5.6)                 | 6(6.7)             | 4(4.4)               |
| Kanuri/Shuwa Arab                  | 44(24.4)                | 23(25.6)           | 21(23.3)             |
| Others                             | 97(53.9)                | 46 (51.1)          | 51(56.7)             |
| <b>Educational level (n, %)*</b>   |                         |                    |                      |
| > Secondary School                 | 111 (62.7)              | 11 (12.2)          | 17(19.5)             |
| Secondary                          | 38 (21.5)               | 10 (11.1)          | 28(32.5)             |
| <Secondary School                  | 28 (15.8)               | 69 (76.7)          | 42(48.2)             |
| <b>Occupational Status (n, %)*</b> |                         |                    |                      |
| Unemployed                         | 63(35)                  | 16(17.8)           | 47(52.2)             |
| Blue Collar                        | 45(25)                  | 28(31.1)           | 17(18.9)             |
| White Collar                       | 72(40)                  | 46(51.1)           | 26(28.9)             |

\*- Significant difference between samples ( $p < 0.05$ )

BMI- Body Mass Index

Table 2: Test-reliability based on intra-class correlation coefficient for Hausa IPAQ– LF, overall and by gender

| PA Measure (MET×min/wk)             | Total (N=180)      |                    |                  | Women (n=90)     | Men (n=90)         |
|-------------------------------------|--------------------|--------------------|------------------|------------------|--------------------|
|                                     | Test 1 (Mean (SD)) | Test 2 (Mean (SD)) | ICC (95%CI)      | ICC (95%CI)      | ICC (95%CI)        |
| Total PA, all domain                | 2160.6 (2691.1)    | 1612.8 (1612.8)    | 0.76 (0.65-0.82) | 0.45 (0.08-0.67) | 0.80 (0.69- 0.87)  |
| Occupation                          | 619.1(1671.5)      | 497.5 (1332.9)     | 0.77 (0.68-0.82) | 0.64 (0.46-0.77) | 0.78 (0.66 -0.85)  |
| Active Transport                    | 468.1 (684.7)      | 440.5 (605.7)      | 0.82 (0.75-0.87) | 0.63 (0.40-0.77) | 0.83 (0.73 - 0.89) |
| Domestic                            | 597.6 (754.6)      | 473.4 (673.7)      | 0.50 (0.32-0.62) | 0.38 (0.01-0.57) | 0.33 (-0.01-0.56)  |
| Leisure                             | 377.0 (1096.3)     | 196.7 (920.2)      | 0.71 (0.60-0.78) | 0.69 (0.53-0.79) | 0.75 (0.63-0.84)   |
| Sitting                             | 2263.0 (715.8)     | 2235.4 (818.9)     | 0.62 (0.42-0.75) | 0.71 (0.46-0.85) | 0.48 (0.06-0.72)   |
| <b>PA by Intensity (MET×min/wk)</b> |                    |                    |                  |                  |                    |
| Walking                             | 613.6 (635.6)      | 534.6 (449.1)      | 0.63 (0.48-0.74) | 0.57 (0.29-0.74) | 0.65 (0.44-0.78)   |
| Moderate                            | 986.9 (1365.9)     | 716.1 (1164.6)     | 0.61 (0.46-0.71) | 0.42 (0.11-0.62) | 0.67 (0.49-0.78)   |
| Vigorous                            | 526.5 (1543.7)     | 394.1 (1431.1)     | 0.82 (0.76-0.87) | 0.55 (0.30-0.71) | 0.86 (0.78-0.91)   |

PA= Physical Activity

MET= Metabolic Energy Turnover

Table 3: Socioeconomic status differences in test- retest reliability of the Hausa IPAQ- LF (N= 180)

| Socioeconomic Status               | Overall PA        | Active Transport  | Occupation PA     | Leisure PA        | Domestic PA      | Sitting           |
|------------------------------------|-------------------|-------------------|-------------------|-------------------|------------------|-------------------|
| <b>Educational Qualification</b>   |                   |                   |                   |                   |                  |                   |
| More than secondary school (n=111) | 0.42 (0.08-0.63)  | 0.67 (0.43-0.78)  | 0.32 (-0.06-0.57) | 0.33 (-0.05-0.57) | 0.58 (0.35-0.73) | 0.23 (-0.63-0.63) |
| Secondary School (n=38)            | 0.55 (0.22-0.74)  | 0.28 (-0.21-0.57) | 0.58 (0.33-0.74)  | 0.54 (0.25-0.71)  | 0.50 (0.19-0.69) | 0.51 (-0.04-0.76) |
| Less than Secondary school (n=28)  | 0.89 (0.67-0.96)  | 0.90 (0.74-0.96)  | 0.82 (0.61-0.92)  | 0.92 (0.83-0.96)  | 0.90 (0.78-0.95) | 0.77 (0.45-0.90)  |
| <b>Employment Category</b>         |                   |                   |                   |                   |                  |                   |
| Employed (117)                     | 0.80 (0.67-0.96)  | 0.83 (0.74-0.88)  | 0.79 (0.70-0.86)  | 0.79 (0.69-0.85)  | 0.36 (0.08-0.56) | 0.56 (0.23-0.75)  |
| Unemployed (63)                    | 0.09 (-8.86-0.56) | 0.68 (0.44-0.82)  | 0.16 (-0.39-0.49) | 0.25 (-0.24-0.55) | 0.65 (0.43-0.79) | 0.68 (0.36-0.80)  |

PA= Physical Activity

Table 4: Differences in time spent in physical activity overall, and by gender and socioeconomic status sub groups

|                                 | Gender             |                  |                    | Education               |                        |                         | Employment            |                         |
|---------------------------------|--------------------|------------------|--------------------|-------------------------|------------------------|-------------------------|-----------------------|-------------------------|
|                                 | Total<br>Mean ± SD | Men<br>Mean ± SD | Women<br>Mean ± SD | >Secondary<br>Mean ± SD | Secondary<br>Mean ± SD | <Secondary<br>Mean ± SD | Employed<br>Mean ± SD | Unemployed<br>Mean ± SD |
| <b>PA by domain (min/wk)</b>    |                    |                  |                    |                         |                        |                         |                       |                         |
| Total PA, all domain            |                    |                  |                    |                         |                        |                         |                       |                         |
| IPAQ1                           | 405.2 (507.8)      | 460.7 (582.9)    | 326.8 (367.8)      | 334.0 (400.8)           | 384.8 (514.8)          | 849.2 (764.1)**         | 441.1 (530.2)         | 285.1 (408.6)*          |
| IPAQ2                           | 308.4 (440.3)      | 319.7 (522.8)    | 291.9 (282.9)      | 285.1 (295.1)           | 184.8 (264.4)          | 803.0 (929.6)**         | 359.4 (481.6)         | 141.0 (185.2)*          |
| Active Transport                |                    |                  |                    |                         |                        |                         |                       |                         |
| IPAQ1                           | 35.8 (89.7)        | 52.4 (127.7)     | 19.5 (17.7)*       | 28.3 (47.7)             | 28.9 (45.02)           | 76.4 (198.7)*           | 43.8 (109.4)          | 21.1 (21.9)*            |
| IPAQ2                           | 30.4 (76.7)        | 41.2 (106.3)     | 19.3 (17.5)*       | 23.6 (30.6)             | 20.3 (30.9)            | 74.3 (182.6)*           | 36.9 (94.1)           | 18.3 (14.7)*            |
| Work                            |                    |                  |                    |                         |                        |                         |                       |                         |
| IPAQ1                           | 160.1 (380.8)      | 217.5 (466.8)    | 79.1 (179.9)*      | 114.8 (291.0)           | 122.9 (365.6)          | 546.7 (615.7)**         | 195.5 (418.8)         | 41.8 (162.2)*           |
| IPAQ2                           | 135.3 (310.3)      | 172.5 (372.8)    | 80.6 (171.9)*      | 104.1 (232.2)           | 160.9 (196.1)          | 531.6 (595.8)**         | 164.1 (341.7)         | 40.1 (133.0)*           |
| Domestic                        |                    |                  |                    |                         |                        |                         |                       |                         |
| IPAQ1                           | 159.6 (202.2)      | 82.3 (120.6)     | 236.9 (235.8)**    | 141.2 (182.4)           | 173.3 (238.5)          | 165.4 (159.4)           | 132.1 (170.7)         | 210.6 (243.8)*          |
| IPAQ2                           | 123.9 (163.9)      | 52.4 (74.9)      | 195.5 (190.1)**    | 131.9 (182.5)           | 107.6 (130.4)          | 147.3 (189.1)           | 112.6 (163.9)         | 205.0 (163.3)*          |
| Leisure                         |                    |                  |                    |                         |                        |                         |                       |                         |
| IPAQ1                           | 62.4 (159.1)       | 75.0 (211.1)     | 10.5 (27.3)**      | 47.0 (97.3)             | 92.7 (209.4)           | 38.2 (160.1)            | 69.7 (157.6)          | 48.7 (162.3)            |
| IPAQ2                           | 30.5 (118.2)       | 50.6 (160.7)     | 10.1 (38.5)**      | 23.4 (51.4)             | 24.7 (91.4)            | 71.5 (256.5)            | 43.1 (143.5)          | 17.0 (28.7)*            |
| Sitting                         |                    |                  |                    |                         |                        |                         |                       |                         |
| IPAQ1                           | 2263.0 (715.8)     | 2188.8 (759.7)   | 2330.7 (674.8)     | 2280.0 (618.7)          | 2433.9 (693.7)         | 2180.9 (760.8)          | 2159.4 (775.9)        | 2337.6 (667.2)          |
| IPAQ2                           | 2235.4 (819.9)     | 2208.7 (916.9)   | 2259.6 (728.1)     | 2420.7 (638.7)          | 2215.3 (663.1)         | 2160.0 (1111.4)         | 2170.6 (870.5)        | 2282.0 (785.5)          |
| <b>PA by Intensity (min/wk)</b> |                    |                  |                    |                         |                        |                         |                       |                         |
| Walking                         |                    |                  |                    |                         |                        |                         |                       |                         |
| IPAQ1                           | 178.5 (221.5)      | 241.1 (271.9)    | 128.2 (100.8)*     | 194.4 (268.1)           | 133.4 (85.6)           | 266.9 (285.4)*          | 192.0 (245.7)         | 133.3 (96.2)*           |
| IPAQ2                           | 142.5 (141.8)      | 148.5 (137.9)    | 133.7 (147.9)      | 151.7 (138.4)           | 103.6(94.7)            | 200.3 (209.1)*          | 150.7 (146.6)         | 115.4 (122.7)           |
| Moderate                        |                    |                  |                    |                         |                        |                         |                       |                         |
| IPAQ1                           | 201.9 (326.9)      | 193.0 (214.5)    | 214.5 (247.8)      | 187.3 (266.5)           | 194.9 (386.5)          | 309.7 (381.7)           | 221.2 (347.4)         | 137.7 (239.9)           |
| IPAQ2                           | 133.9 (238.5)      | 114.2 (276.9)    | 162.7 (165.6)      | 132.9 (177.8)           | 88.0 (197.2)           | 319.0 (482.1)*          | 153.9 (266.2)         | 68.0 (76.4)*            |
| Vigorous                        |                    |                  |                    |                         |                        |                         |                       |                         |
| IPAQ1                           | 94.1 (211.8)       | 123.7 (249.6)    | 52.2 (133.2)*      | 32.9 (81.9)             | 129.5 (208.2)          | 268.0 (459.7)**         | 90.2 (214.6)          | 127.1 (204.6)           |
| IPAQ2                           | 78.4 (206.9)       | 86.8 (227.4)     | 46.2 (73.4)        | 52.2 (140.2)            | 55.2 (127.0)           | 292.8 (461.5)**         | 92.8 (226.9)          | 130.9 (107.8)           |



1 PA= Physical Activity  
2 \*=p<0.05  
3 \*\*=p<0.001  
4  
5  
6  
7  
8  
9

For peer review only

10  
11  
12  
13  
14  
15  
16  
17  
18  
19  
20  
21  
22  
23  
24  
25  
26  
27  
28  
29  
30  
31  
32  
33  
34  
35  
36  
37  
38  
39  
40  
41  
42  
43  
44  
45  
46  
47  
48  
49

Table 5: Construct validity of Hausa IPAQ-LF: Spearman correlations between energy expenditure (MET×min/wk) from Hausa IPAQ– LF, and anthropometric and biological variables (N=180)

|                     | Overall (N = 180) |        |         | Female (n = 90) |         |         | Male (n = 90) |         |       |
|---------------------|-------------------|--------|---------|-----------------|---------|---------|---------------|---------|-------|
| MET×min/wk          | BMI               | DBP    | SBP     | BMI             | DBP     | SBP     | BMI           | DBP     | SBP   |
| <b>PA Domains</b>   |                   |        |         |                 |         |         |               |         |       |
| Total PA            | -0.29**           | -0.17* | -0.09   | -0.09           | -0.23** | -0.04   | -0.41**       | -0.08   | -0.14 |
| Occupation PA       | -0.12             | -0.09  | 0.01    | 0.02            | 0.02    | -0.05   | -0.22**       | -0.17   | -0.08 |
| Active transport PA | -0.05             | -0.04  | -0.01   | -0.10           | -0.13   | -0.02   | -0.04         | -0.02   | -0.80 |
| Domestic PA         | -0.07             | -0.17* | -0.26** | -0.23**         | -0.20*  | -0.31** | 0.04          | -0.14   | -0.04 |
| Leisure PA          | 0.09              | -0.08  | -0.16*  | -0.11           | 0.02    | 0.08    | -0.39**       | -0.12   | -0.06 |
| Sitting             | 0.16              | -0.09  | 0.04    | 0.19            | 0.12    | 0.05    | 0.15          | -0.09   | 0.05  |
| <b>PA Intensity</b> |                   |        |         |                 |         |         |               |         |       |
| Walking             | 0.90              | -0.09  | -0.03   | 0.19            | -0.05   | 0.08    | -0.05         | -0.11   | -0.15 |
| Moderate            | -0.02             | 0.21*  | 0.16*   | 0.02            | -0.14   | -0.08   | 0.02          | -0.25** | -0.16 |
| Vigorous            | -0.11*            | -0.06  | 0.03    | -0.16           | 0.01    | 0.02    | -0.13*        | -0.12   | -0.11 |

MET= Metabolic Energy Turnover

BMI= Body Mass Index

DBP= Diastolic Blood Pressure

SBP= Systolic Blood Pressure

PA= Physical activity

\*=p<0.05,

\*\*=p<0.01

1  
2  
3  
4  
5  
6  
7  
8  
9  
10  
11  
12  
13  
14  
15  
16  
17  
18  
19  
20  
21  
22  
23  
24  
25  
26  
27  
28  
29  
30  
31  
32  
33  
34  
35  
36  
37  
38  
39  
40  
41  
42  
43  
44  
45  
46  
47  
48  
49  
50  
51  
52  
53  
54  
55  
56  
57  
58  
59  
60

For peer review only

1  
2  
3  
4  
5  
6  
7  
8  
9  
10  
11  
12  
13  
14  
15  
16  
17  
18  
19  
20  
21  
22  
23  
24  
25  
26  
27  
28  
29  
30  
31  
32  
33  
34  
35  
36  
37  
38  
39  
40  
41  
42  
43  
44  
45  
46  
47  
48  
49  
50  
51  
52  
53  
54  
55  
56  
57  
58  
59  
60

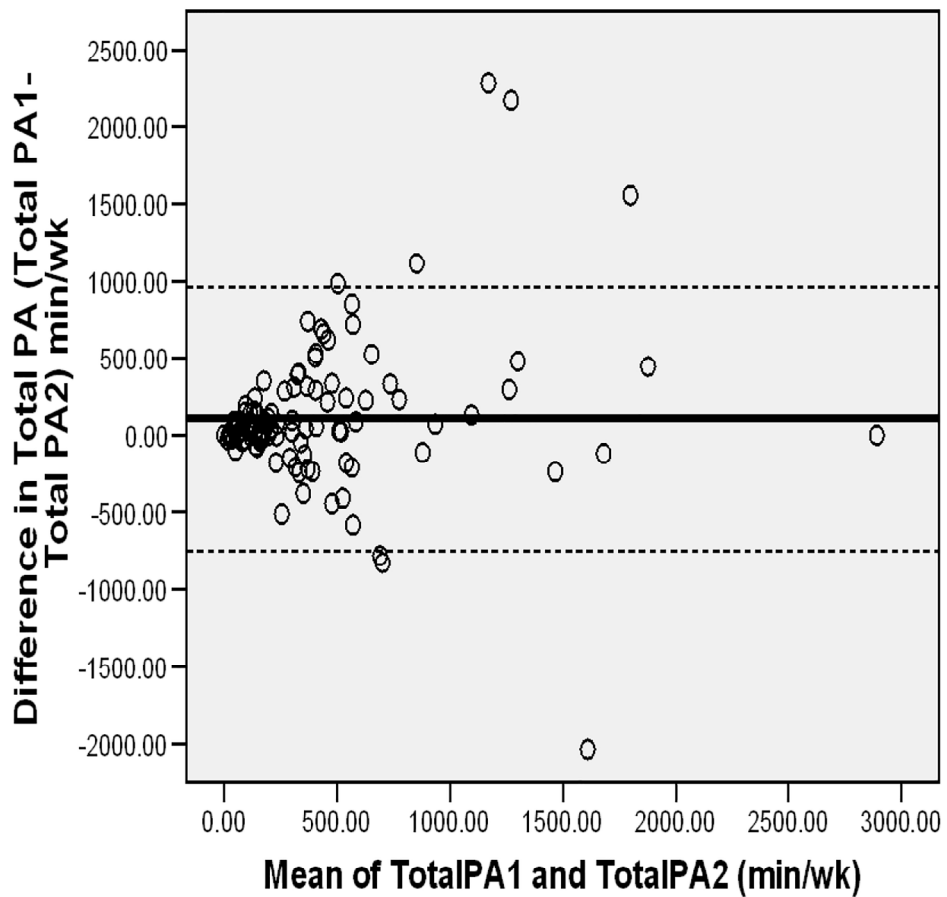

Figure 1: Bland-Altman plot min/wk reported in total physical activity (PA for the first and second administrations of Hausa IPAQ-LF. Mean difference: 106.7 +/- 2SD (Standard deviation) = -762.2 to 965.6

238x265mm (300 x 300 DPI)

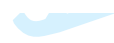

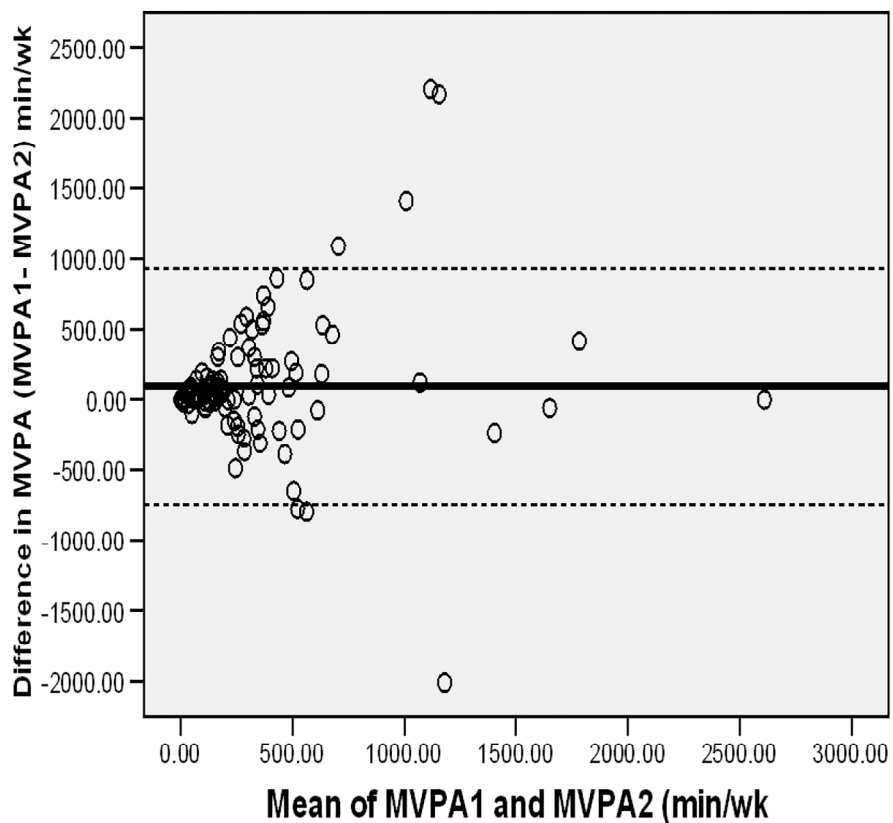

Figure 2: Bland-Altman plot for min/wk reported in moderate-to-vigorous physical activity (MVPA) for the first and second administrations of Hausa IPAQ-LF: Mean difference: 91.6 +/- 2SD (Standard Deviation)=-744.5 to 927

239x287mm (300 x 300 DPI)

1  
2  
3  
4  
5  
6  
7  
8  
9  
10  
11  
12  
13  
14  
15  
16  
17  
18  
19  
20  
21  
22  
23  
24  
25  
26  
27  
28  
29  
30  
31  
32  
33  
34  
35  
36  
37  
38  
39  
40  
41  
42  
43  
44  
45  
46  
47  
48  
49  
50  
51  
52  
53  
54  
55  
56  
57  
58  
59  
60

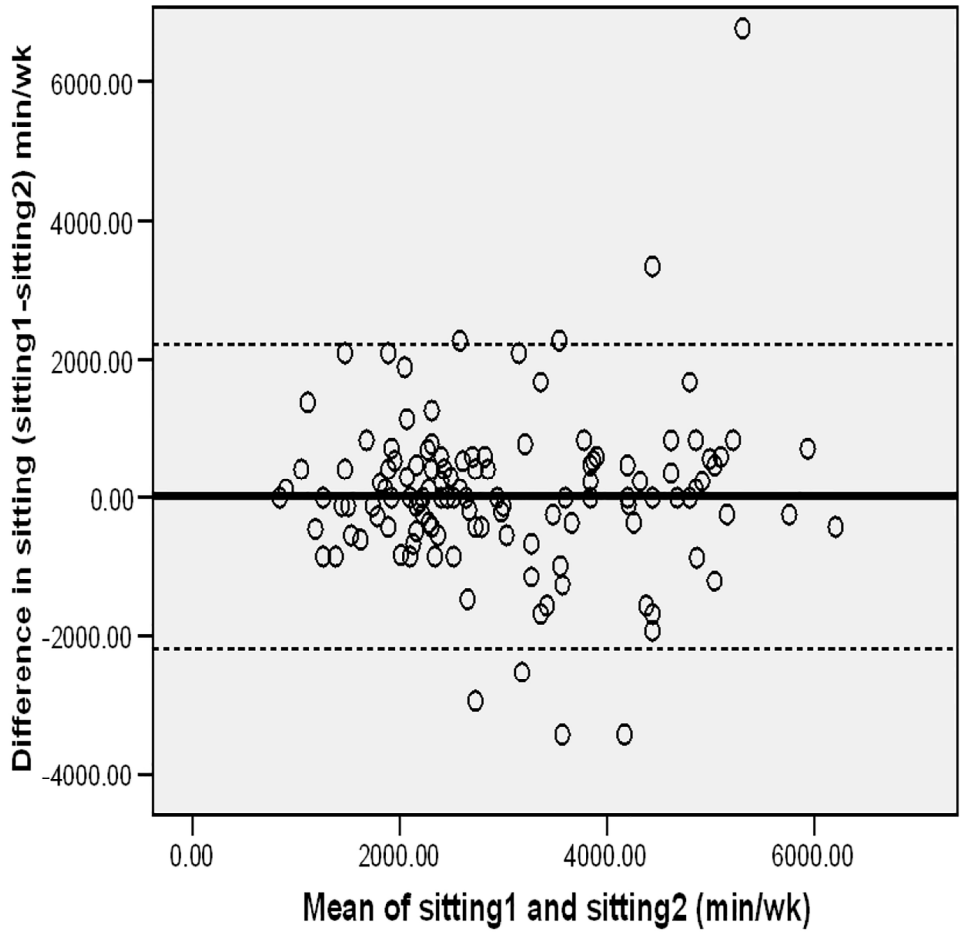

Figure 3: Bland-Altman plot min/wk reported in sitting for the first and second administration of Hausa IPAQ-LF. Mean difference: 26.4  $\pm$  2SD (Standard Deviation) = -2178.1 to 2230.9

236x259mm (300 x 300 DPI)

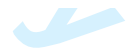

# BMJ Open

## Examining the reliability and validity of a modified version of the International Physical Activity Questionnaire, long form (IPAQ-L) in Nigeria: A cross-sectional study

|                                 |                                                                                                                                                                                                                                                                                                                                                                          |
|---------------------------------|--------------------------------------------------------------------------------------------------------------------------------------------------------------------------------------------------------------------------------------------------------------------------------------------------------------------------------------------------------------------------|
| Journal:                        | <i>BMJ Open</i>                                                                                                                                                                                                                                                                                                                                                          |
| Manuscript ID:                  | bmjopen-2014-005820.R2                                                                                                                                                                                                                                                                                                                                                   |
| Article Type:                   | Research                                                                                                                                                                                                                                                                                                                                                                 |
| Date Submitted by the Author:   | 07-Nov-2014                                                                                                                                                                                                                                                                                                                                                              |
| Complete List of Authors:       | Oyeyemi, Adewale; University of Maiduguri, Physiotherapy<br>Bello, Umar; University of Maiduguri, Physiotherapy<br>Philemon, Saratu; Jos University Teaching Hospital, Physiotherapy<br>Aliyu, Habibu; University of Maiduguri, Physiotherapy<br>Majidadi, Rebecca; University of Maiduguri, Physiotherapy<br>Oyeyemi, Adetoyeje; University of Maiduguri, Physiotherapy |
| <b>Primary Subject Heading</b>: | Public health                                                                                                                                                                                                                                                                                                                                                            |
| Secondary Subject Heading:      | Epidemiology, Sports and exercise medicine                                                                                                                                                                                                                                                                                                                               |
| Keywords:                       | PUBLIC HEALTH, SOCIAL MEDICINE, EPIDEMIOLOGY                                                                                                                                                                                                                                                                                                                             |
|                                 |                                                                                                                                                                                                                                                                                                                                                                          |

SCHOLARONE™  
Manuscripts

1  
2  
3 1 **Examining the reliability and validity of a modified version of the International Physical**  
4 **Activity Questionnaire, long form (IPAQ-L) in Nigeria: A cross-sectional study**  
5  
6  
7  
8

9 4 Adewale L. Oyeyemi\*<sup>1</sup>, Umar M. Bello<sup>1</sup>, Saratu T. Philemon<sup>2</sup>, Habeeb N. Aliyu<sup>1</sup>, Rebecca W.  
10 Majidadi<sup>1</sup>, Adetoyeje Y. Oyeyemi<sup>1</sup>  
11  
12  
13

14 7 <sup>1</sup>Department of Physiotherapy, College of Medical Sciences, University of Maiduguri,  
15 Nigeria  
16

17 9 <sup>2</sup> Department of Physiotherapy, Jos University Teaching Hospital, Nigeria  
18  
19  
20  
21  
22

23 13 \*Correspondence to Dr. Adewale L. Oyeyemi, Department of Physiotherapy, College of  
24 14 Medical Sciences, University of Maiduguri, Nigeria. Email: [alaoyeyemi@yahoo.com](mailto:alaoyeyemi@yahoo.com);  
25 15 Telephone: +234-802-945-8230  
26  
27  
28  
29  
30

31 18 **Key words:** Physical activity, measurement, public health, IPAQ, Nigeria  
32  
33  
34

35 20 **Word counts:** 4352  
36  
37  
38  
39  
40  
41  
42  
43  
44  
45  
46  
47  
48  
49  
50  
51  
52  
53  
54  
55  
56  
57  
58  
59  
60



1  
2  
3  
4  
5  
6  
7  
8  
9  
10  
11  
12  
13  
14  
15  
16  
17  
18  
19  
20  
21  
22  
23  
24  
25  
26  
27  
28  
29  
30  
31  
32  
33  
34  
35  
36  
37  
38  
39  
40  
41  
42  
43  
44  
45  
46  
47  
48  
49  
50  
51  
52  
53  
54  
55  
56  
57  
58  
59  
60

## 33 ABSTRACT

34 **Objectives:** To investigate the reliability and aspect of validity of a modified version of the long  
35 International Physical Activity Questionnaire (Hausa IPAQ-LF) in Nigeria.

36 **Design:** Cross-sectional study, examining the reliability and construct validity of the Hausa  
37 IPAQ-LF compared with anthropometric and biological variables.

38 **Setting:** Metropolitan Maiduguri, the capital city of Borno State in Nigeria.

39 **Participants:** 180 Nigerian adults (50% women) with a mean age of 35.6 (SD=10.3) years,  
40 recruited from neighbourhood with diverse socioeconomic status and walkability.

41 **Outcome measures:** Domains (domestic physical activity [PA], occupational PA, leisure-time  
42 PA, active transportation and sitting time) and intensities of PA (vigorous, moderate and  
43 walking) were measured with the Hausa IPAQ-LF on two different occasions, eight days apart.  
44 Outcomes for construct validity were measured BMI, SBP and DBP.

45 **Results:** The Hausa IPAQ-LF demonstrated good test-retest reliability ( $ICC > 0.75$ ) for total PA  
46 ( $ICC = 0.79$ , 95%  $CI = 0.65-0.82$ ), occupational PA ( $ICC = 0.77$ , 95%  $CI = 0.68-0.82$ ), active  
47 transportation ( $ICC = 0.82$ , 95%  $CI = 0.75-0.87$ ) and vigorous intensity activities ( $ICC = 0.82$ , 95%  
48  $CI = 0.76-0.87$ ). Reliability was substantially higher for total PA ( $ICC = 0.80$ ), occupational PA  
49 ( $ICC = 0.78$ ), leisure-time PA ( $ICC = 0.75$ ) and active transportation ( $ICC = 0.80$ ) in men than  
50 women, but domestic PA ( $ICC = 0.38$ ) and sitting time ( $ICC = 0.71$ ) demonstrated substantial  
51 reliability coefficients in women than men. For the construct validity, domestic PA was  
52 significantly related mainly with SBP ( $\rho = -0.27$ ) and DBP ( $\rho = -0.17$ ), and leisure-time PA and  
53 total PA were significantly related only with SBP ( $\rho = -0.16$ ) and BMI ( $\rho = -0.29$ ), respectively.  
54 Similarly, moderate-intensity PA was mainly related with SBP ( $\rho = -0.16$ ,  $p < 0.05$ ) and DBP ( $\rho$   
55  $= -0.21$ ,  $p < 0.01$ ), but vigorous-intensity PA was only related with BMI ( $\rho = -0.11$ ,  $p < 0.05$ ).

56 **Conclusions:** The modified Hausa IPAQ-LF demonstrated sufficient evidence of test-retest  
57 reliability and may be valid for assessing context specific PA behaviours of adults in Nigeria.

**ARTICLE SUMMARY****Strengths and limitations of this study.**

- Systematic adaptation and tailoring of items on the original IPAQ-LF to reflect the common PA behaviours of adults in Nigeria.
- The first study to describe the cultural adaptation and translations of the IPAQ-LF and explore its psychometric relevance in an African country.
- Findings establish evidence to support the feasibility of using a modified IPAQ-LF to reliably collect context specific PA behaviours of adults in the African region.
- Exploring construct validity through the relationships of PA with BMI and resting blood pressure was an important limitation of this study.
- The use of non-probability sampling technique may limit generalizability of findings to other samples of Nigerian adults with different characteristics from the study's sample.

## 106 INTRODUCTION

107  
108 The importance of physical activity (PA) for promoting health and preventing disease is well  
109 established.[1-3] However, for effective health promotion and PA surveillance and monitoring, it  
110 is important to have standardized, reliable and valid instruments that can be used to accurately  
111 describe population levels and patterns of PA within and across countries.[4, 5] In this context,  
112 the international physical activity questionnaire (IPAQ) was developed to obtain internationally  
113 comparable data on health-related PA of adults (18-65 years).[5, 6] Two versions of the IPAQ  
114 that could be administered by interview or self-completed were developed. The short form (SF)  
115 was designed for population surveillance of PA; while the long form (LF) was designed to be  
116 appropriate for use in research that requires detailed information on different PA domains,  
117 including PA at work, household, during leisure and transportation, and time spent in sedentary  
118 activities.[6]

119  
120 The initial evaluation of the IPAQ across 12 countries produced acceptable evidence of  
121 reliability and validity that are as good as other self-report measures of PA.[5] Consequently, in  
122 order to enhance the utility of IPAQ and to further evaluate its psychometrics worldwide, efforts  
123 have been made to translate and adapt the IPAQ in many other countries, but most of the  
124 research in this context were from the Western developed countries.[7-14] In Africa, the  
125 psychometric properties of IPAQ have only been tested in South-Africa as part of the initial  
126 development process of the questionnaire,[5] and in older adults.[15] Because the largest  
127 increases and burden of non-communicable diseases (NCDs) are in the low-income countries  
128 where the understanding of evidence-based strategies for increasing PA remains poor,[16-19]  
129 improving PA research is a top priority for low-income countries.[20] However, to advance PA  
130 research in Africa, it is important to first develop or tailor standardized measures to be culturally  
131 sensitive to PA behaviours of people in the region countries. Because Nigeria is the most  
132 populous country in Africa with culture and languages similar to most of the other West African  
133 countries, it is a good choice to evaluate the IPAQ for cultural and psychometric relevance in this  
134 country.

135

1  
2  
3 136 Recently, a cultural adaptation study of the IPAQ-SF was conducted among adults in  
4  
5 137 Nigeria,[21] with good evidence of test-retest reliability similar to findings in some other  
6  
7 138 studies.[10, 22-24] However, because the IPAQ-SF is not domain specific and does not provide  
8  
9 139 context specific information on PA behaviour, it is important to evaluate the IPAQ-LF for  
10  
11 140 relevance in Nigeria. Psychometric evaluation of a culturally modified version of the IPAQ-LF  
12  
13 141 in sub-Saharan African countries can impact PA research and surveillance in the African region  
14  
15 142 where the prevalence of inactivity related NCDs is on the increase.[20, 25] The aim of the  
16  
17 143 present study was to investigate the reliability and an aspect of validity of a modified version of  
18  
19 144 the IPAQ-LF among adults in Nigeria.  
20

## 21 146 **METHODS**

### 24 148 **Participants**

26 149 A purposive sample of 180 adults from eight neighbourhoods that varied in socioeconomic status  
27  
28 150 and walkability in Maiduguri city were recruited for the study. The sampling and neighbourhood  
29  
30 151 selection strategy have been described in details elsewhere.[26] Maiduguri with an estimated  
31  
32 152 population of 749,123 people is the largest and capital city of Borno State in North-Eastern  
33  
34 153 Nigeria.[27] The city attracts immigrants from neighbouring countries of Cameroon, Niger and  
35  
36 154 Chad Republic, and Hausa language is the common means of communication for commercial  
37  
38 155 activities among the diverse inhabitants of Maiduguri.[27, 28] Participants were eligible for this  
39  
40 156 study if they were willing to self-complete a written survey twice in either Hausa or English  
41  
42 157 Language. However, researchers (UMB and STP) were in attendance to provide translation and  
43  
44 158 interpretation assistance to participants (n=11) who required help to complete the survey.  
45  
46 159 Additional eligibility criteria included living within the identified neighbourhood categories in  
47  
48 160 the last 12 months, being adults (18-65 years) and not having any disability that prevented  
49  
50 161 independent walking. All participants were fully informed of the study protocol and provided  
51  
52 162 signed informed consent. The study protocol was approved by the Research and Ethic  
53  
54 163 Committee of the University of Maiduguri Teaching Hospital, Maiduguri, Nigeria. Data were  
55  
56 164 collected between March and May, 2012.  
57  
58  
59  
60

1  
2  
3 166 **Measures**

4  
5 167 *The adapted international physical activity questionnaire- long Hausa version*

6  
7 168 The cultural adaptation, translation and back translation of the Hausa version of IPAQ-LF is  
8  
9 169 similar to that of the Hausa IPAQ-SF that has been described in details elsewhere.[21] Briefly,  
10  
11 170 interviews were conducted with public health experts, exercise scientists and not highly educated  
12  
13 171 local people to identify the items and examples of PA on the original questionnaires that needed  
14  
15 172 to be culturally adapted. Several cultural adaptations were made to the original items to reflect  
16  
17 173 the reality in Nigeria. First, adjustments to English words like vigorous and moderate activity  
18  
19 174 that can be misunderstood and not associated with PA behaviours in Nigeria were replaced with  
20  
21 175 words that are more representative of the language used in Nigeria, like ‘very hard’ and ‘hard’  
22  
23 176 respectively. Second, examples of various intensities of activity that were common in the  
24  
25 177 Nigerian culture were added, and those already on the questionnaire but not common in the  
26  
27 178 Nigerian context were replaced with culturally applicable examples that are equivalent in energy  
28  
29 179 intensity (METs) with the original items and examples. Third, concepts like physical activity and  
30  
31 180 walking for transportation that were misconstrued outside the health context were refined to  
32  
33 181 indicate they were referring to health behaviours.

34  
35 182  
36  
37 183 After adaptation, the questionnaire was independently translated from English into Hausa  
38  
39 184 language by two native speakers of Hausa who also speaks English, and able to read and write in  
40  
41 185 both languages. One of the translators was familiar with the questionnaire and the second was an  
42  
43 186 expert in Hausa language. The translated questionnaires were mutually revised by the translators  
44  
45 187 and the research team for consistency and then back translated into English language by a third  
46  
47 188 bilingual person who was familiar with the construct measured by IPAQ. The back translated  
48  
49 189 version was checked by the research team for any discrepancies and to ensure that the construct  
50  
51 190 measures by IPAQ had not been lost during the adaptation and translation process.

52  
53 191  
54  
55 192 The modified questionnaire (available in both Hausa and English language), hereafter referred to  
56  
57 193 as the Hausa version of the long international physical activity questionnaire (Hausa IPAQ-LF),  
58  
59 194 contains thirty-one questions that asked about physical activity done in the last 7-days in terms of  
60  
195 frequency (days/week) and duration (minutes/day) spent in four activity domains (transportation,

1  
2  
3 196 occupation, domestic and leisure time), and included sections on walking, moderate- and  
4  
5 197 vigorous- intensity activities, and time spent in sedentary behaviours (sitting during leisure and  
6  
7 198 motorized transportation). The Hausa IPAQ-LF data were presented as the MET-minute/week  
8  
9 199 for total walking, moderate, and vigorous intensity activity and overall physical activity across  
10  
11 200 the four domains, and in each of the domains. The MET intensity values used to score the Hausa  
12  
13 201 IPAQ-LF questions in this study were 8 METs for vigorous activity, 4 METs for moderate  
14  
15 202 activity and 3.3 METs for walking,[2, 6] One MET represents the energy expended while sitting  
16  
17 203 quietly at rest and is equivalent to 3.5 ml/kg/min of  $VO_2$  Max.[3] To assess the test-retest  
18  
19 204 reliability of the Hausa IPAQ-LF, participants self-completed all items on the measure twice,  
20  
21 205 with an interval of one week between administrations.

22

### 23 207 *Anthropometrical and biological measurements*

24  
25 208 Body weight (to nearest 0.5 kg) and Height (to nearest 0.1 cm) were measured in light clothing  
26  
27 209 using a digital scale and stadiometer. Body mass index (BMI) was calculated as body weight  
28  
29 210 divided by the square of height ( $kg/m^2$ ). The principal cutoff points as recommended by WHO  
30  
31 211 were used to create the categories: underweight ( $< 18.5 kg/m^2$ ), normal weight ( $18.5- < 25$   
32  
33 212  $kg/m^2$ ), overweight ( $25- < 30 kg/m^2$ ) and obese ( $\geq 30 kg/m^2$ ).[29] Resting blood pressure and heart  
34  
35 213 rate were measured with Digital Sphygmomanometer (Diagnostic Advanced Wrist Blood  
36  
37 214 Pressure Monitor, Model 6016, USA). Body mass index and resting diastolic blood pressure  
38  
39 215 (DBP) have previously been used for validating the IPAQ.[7,24] Similarly, for this study,  
40  
41 216 construct validity was evaluated by investigating the relationship of outcomes from the Hausa  
42  
43 217 IPAQ-LF with anthropometric (BMI) and biological (SBP and DBP) measurements, and also in  
44  
45 218 part by comparing the differences in time spent in PA and sitting across sociodemographic  
46  
47 219 subgroups. These types of validation for PA measures have been referred as indirect or construct  
48  
49 220 validity in previous studies.[7,24,30]

221

### 222 222 *Sociodemographic Characteristics*

223  
224 Information on age, gender, marital status, religion, income, educational level and employment  
225  
226 status were elicited from the participants. Marital status was classified as married or not married.  
227  
228 Educational level was classified as more than secondary school education, secondary school

1  
2  
3 226 education and less than secondary school education. Employment status was classified into white  
4  
5 227 collar (government or private employed), blue collar (self- employed, trader, artisan etc) and  
6  
7 228 unemployed (homemaker, student, retired, or unable to find job).  
8  
9

10 229

### 11 230 **Data Analysis**

12  
13 231 Descriptive data were reported as mean, standard deviation and percentages. Mean group  
14  
15 232 differences for continuous variables by gender were examined by independent t-test, and for  
16  
17 233 dichotomous variables by chi-square statistics. The reliability analyses were performed using 2  
18  
19 234 strategies. First, the two- way mixed model (single measure) intraclass correlation coefficient  
20  
21 235 (ICC) with 95% confidence interval (CI) between the continuous scores obtained on 1<sup>st</sup> and 2<sup>nd</sup>  
22  
23 236 administration of the Hausa IPAQ-LF was calculated. The ICCs were calculated overall, and by  
24  
25 237 gender and socioeconomic status. ICC estimates >0.75 were considered as good reliability  
26  
27 238 scores, between 0.50 and 0.75 as moderate reliability and <0.50 as poor reliability.[31] Second,  
28  
29 239 the Bland and Altman Method was used to assess agreement on scores of PA from the 1<sup>st</sup> and 2<sup>nd</sup>  
30  
31 240 administrations.[32] Variables used for the Bland and Altman analysis were weekly time spent in  
32  
33 241 moderate-to-vigorous activity (MVPA), total PA and sitting. MVPA was computed by summing  
34  
35 242 the total minutes/week of reported physical activity of moderate and vigorous- intensities across  
36  
37 243 all four domains. For total PA, the total minutes/week of activities in each domain were summed  
38  
39 244 (total work + total transport + total domestic + total leisure-time min/week scores) to gain an  
40  
41 245 overall estimate of physical activity in a week. Also, the independent t-test and one-Way  
42  
43 246 ANOVA were used as appropriate to compare the time spent (minutes/week) in PA at both  
44  
45 247 administrations across sociodemographic subgroups. To assess construct validity, the non-  
46  
47 248 parametric Spearman correlation coefficients ( $\rho$ ) were utilized to explore the relationship  
48  
49 249 between MET-min/week of PA from the Hausa IPAQ- LF, and resting blood pressure and body  
50  
51 250 mass index. Data were analyzed using Statistical Package for the Social Science (SPSS), version  
52  
53 251 15.0 for windows (SPSS Inc., Chicago, Illinois, USA) and the level of significance was set at  
54  
55 252  $p < 0.05$ .  
56  
57 253

### 54 254 **RESULTS**

1  
2  
3 255 The socio-demographic characteristic of the participants are shown in Table 1. The participants  
4  
5 256 comprised 50% women and men, with a mean age of  $35.6 \pm 10.3$  years and body mass index of  
6  
7 257  $23.8 \pm 3.9\text{kg/m}^2$ . Majority of the participants were married (58.9%, n=106), had more than  
8  
9 258 secondary school education (62.7%, n=111) and were employed (75%, n=117). Compared to  
10  
11 259 men, the women were more likely to be married (71.1% vs 46.7%,  $p=0.001$ ) and unemployed  
12  
13 260 (52.2% vs 17.8%,  $p<0.001$ ), but men were more likely to have more than secondary school  
14  
15 261 education (76.7% vs 48.2%,  $p<0.001$ ).  
16

### 17 263 **Reliability**

18  
19 264 Table 2 shows the test-retest reliability of the modified IPAQ-LF. Overall, reliability coefficients  
20  
21 265 were good (ICC >0.75) for total PA, occupational PA, active transportation and vigorous intensity  
22  
23 266 (very hard) PA. Domestic PA, sitting activity and leisure PA demonstrated moderate reliability  
24  
25 267 (ICC ranges from 0.51- 0.71). While, the reliability coefficients of total PA (ICC=0.80, 95%  
26  
27 268 CI=0.69-0.87), active transportation (ICC=0.83, 95% CI=0.73-0.89), occupational PA  
28  
29 269 (ICC=0.78, 95% CI=0.66-0.85) and leisure time PA (ICC=0.75, 95% CI=0.63-0.84) were  
30  
31 270 substantially higher among men than women, reliability coefficients for domestic PA (ICC=0.38,  
32  
33 271 95%, CI=0.01-0.57) and sitting time (ICC=0.71, 95% CI=0.46-0.85) were higher among women  
34  
35 272 than men. According to the intensity of PA, ICCs range between 0.61 and 0.82, with the lowest  
36  
37 273 value recorded for moderate intensity (hard) PA and the highest value for vigorous intensity  
38  
39 274 (very hard) PA. The reliability coefficients for walking, moderate-intensity (hard) and vigorous  
40  
41 275 intensity (very hard) activities were substantially greater in men than women.  
42

43 276  
44 277 Similarly, socioeconomic status differences were observed in the reliability coefficients of the  
45  
46 278 modified IPAQ-LF (Table 3). Across all domains of PA, reliability coefficients were  
47  
48 279 substantially higher among participants with less than secondary school education (ICC from  
49  
50 280 0.77 [sitting activity] to 0.92 [leisure activity]) compared to those with secondary school  
51  
52 281 education (ICC from 0.28 [active transport] to 0.58 [occupational activity]) and those with higher  
53  
54 282 than secondary school education (ICC from 0.23 [sitting activity] to 0.67[active transport]).  
55  
56 283 While reliability coefficients were higher for overall PA (ICC=0.80, 95% CI=0.71- 0.86), active  
57  
58 284 transport (ICC=0.83, 95% CI=0.74- 0.88), occupational PA (ICC=0.79, 95% CI=0.70- 0.86) and  
59  
60



1  
2  
3 285 leisure-time PA (ICC= 0.79, 95% CI= 0.69- 0.85) among participants that were employed  
4  
5 286 compared to their unemployed counterparts, it was higher for domestic PA (ICC=0.65, 95%  
6  
7 287 CI=0.43- 0.79) and sitting time (ICC= 0.68, 95% CI= 0.36- 0.83) among participants that were  
8  
9 288 unemployed than in the employed subgroup.

10 289  
11  
12 290 Figures 1, 2 and 3 (Bland-Altman plots) illustrate the agreement in the scores (minutes/week) of  
13  
14 291 total PA, MVPA and sitting between the first and second administrations of Hausa IPAQ-LF. For  
15  
16 292 total PA, the mean difference was 106.7 minutes/week, with a wide 95% limits of agreement (-  
17  
18 293 762.2 to 965.6 minutes/week). For MVPA, the mean difference was about one and half hour per  
19  
20 294 week (91.6 minutes/week), and also demonstrating wide 95% limits of agreement (-744.5 to  
21  
22 295 927.7 minutes/week). For sitting time, the mean difference was small (26 minutes/week) and the  
23  
24 296 95% limits of agreement range from -2178.1 to 2230.9 minutes/week.

25 297  
26 298 Table 4 shows the patterns of PA across sociodemographic subgroups during the first (IPAQ1)  
27  
28 299 and second (IPAQ2) administrations of the modified IPAQ-LF. Overall and across all stratified  
29  
30 300 variables, time spent in PA reported during the first administration tends to be higher than those  
31  
32 301 reported during the second administration. At both time points, men reported significantly  
33  
34 302 ( $p<0.05$ ) higher mean time (minute/week) in active transportation, occupational PA, and leisure-  
35  
36 303 time PA than women. However, women spent significantly ( $p<0.001$ ) more time (minutes/week)  
37  
38 304 in domestic PA than men (IPAQ1=236.9 vs 82.3, IPAQ2=195.5 vs 52.4). For educational status,  
39  
40 305 participants that had lower than secondary school education compared to those with at least  
41  
42 306 secondary school education reported statistically significant higher mean time (minutes/week) at  
43  
44 307 both time points for total PA, active transport, occupational PA, walking and vigorous intensity  
45  
46 308 activity compared to those with at least secondary school education. While participants that were  
47  
48 309 employed reported statistically significant ( $p<0.05$ ) more time (minutes/week) in total PA  
49  
50 310 (IPAQ1=441.1 vs 285.1, IPAQ2=359.4 vs 141.0), active transportation (IPAQ1=43.8 vs 21.1,  
51  
52 311 IPAQ2=36.9 vs 18.3) and work PA (IPAQ1=195.5 vs 41.8, IPAQ2=164.1 vs 40.1) than those  
53  
54 312 who were unemployed, the unemployed reported statistically significant ( $p<0.05$ ) higher time in  
55  
56 313 domestic activity (IPAQ1=210.6 vs 132.1, IPAQ2=205.0 vs 112.6) compared to the employed.

57  
58  
59  
60

### 315 **Construct Validity**

316 Overall, correlations between energy expenditure (MET-Minutes/week) according to the  
317 modified IPAQ-LF and anthropometric and biological measures were statistically significant in  
318 the expected direction for all domains and intensities of PA, except for occupation and active  
319 transport domains and walking (table 5). In the full sample, domestic PA was mainly related with  
320 SBP ( $\rho = -0.27$ ,  $p < 0.01$ ) and DBP ( $\rho = -0.17$ ,  $p < 0.05$ ), while leisure PA and total PA were only  
321 related with SBP ( $\rho = -0.16$ ,  $p < 0.05$ ) and BMI ( $\rho = -0.29$ ,  $p < 0.01$ ), respectively. Similarly,  
322 moderate-intensity PA was mainly related with SBP ( $\rho = -0.16$ ,  $p < 0.05$ ) and DBP ( $\rho = -0.21$ ,  $p <$   
323  $0.01$ ), but vigorous-intensity PA was only related with BMI ( $\rho = -0.11$ ,  $p < 0.05$ ). In the gender  
324 based analyses, total PA, domestic PA and sedentary time were more consistently related with  
325 anthropometric and biological variables. The strongest rho value (-0.41) was found for the  
326 relationship between total PA and BMI for the male subgroup. The rho values of -0.23 was  
327 reached between total PA and DBP for the women subgroup. Only in women was domestic PA  
328 significantly related with BMI ( $\rho = -0.23$ ), DBP ( $\rho = -0.20$ ) and SBP ( $\rho = -0.31$ ). Leisure-time  
329 PA ( $\rho = -0.39$ ) and occupational PA ( $\rho = -0.22$ ) were significantly related with BMI only in men.  
330 The rho value for the relationship between sitting time and BMI was slightly higher in women ( $\rho$   
331  $= 0.19$ ) than men ( $\rho = 0.15$ ).

332

### 333 **DISCUSSION**

334 This study examined the reliability and an aspect of validity of a modified version of the IPAQ-  
335 LF in Nigeria. The findings generally indicated acceptable test-retest reliability and modest  
336 construct validity for items of the modified IPAQ-LF among Nigerian adults. To the best of our  
337 knowledge, the present study is the only one to examine the reliability and validity of the long  
338 version of IPAQ that has been modified specifically to an indigenous African culture and  
339 language.

340

341 We found evidence for good reliability with high correlations between the test-retest for total  
342 PA, occupational PA, active transportation and vigorous intensity activity. Our results shows that  
343 except for domestic PA and sitting time, ICC values for domains of PA were consistently above  
344 0.70, a level of reproducibility that has been considered acceptably good for IPAQ data.[33,34]

1  
2  
3 345 Similar to a previous IPAQ-LF study in Hong Kong,[34] domestic activity demonstrated the  
4  
5 346 lowest ICC value in our study. However, it is possible that the infrequent nature of household  
6  
7 347 activities undertaken, especially by men may account for the low reliability reported for domestic  
8  
9 348 PA in our study. In addition to the traditional African patriarchal norm that make most African  
10  
11 349 men to rarely engage in indoor household activities, men in the high socioeconomic group in  
12  
13 350 Nigeria may also not engage in outdoor domestic activities like gardening and outdoor home,  
14  
15 351 appliances and equipment maintenance because they are able to employ the services of domestic  
16  
17 352 helpers and repair men. Our findings of lower reliability for domestic activity among men, those  
18  
19 353 with more than secondary school education and those who were employed compared to their  
20  
21 354 counterparts seem to support this assumption.  
22

23 355  
24 356 The highest and strongest reliability coefficients (0.82) were found for both active transportation  
25  
26 357 and vigorous intensity activity. Perhaps, active transportation was more stable, consistent and  
27  
28 358 reproducible overtime than other PA domains because it is a common and ubiquitous PA  
29  
30 359 behaviour in the African region. Mostly, the performance of active transportation especially  
31  
32 360 walking is often out of necessity rather than choice within the African context. Our finding of  
33  
34 361 higher ICC value for vigorous intensity PA is consistent with those of other studies that found  
35  
36 362 the reliability of vigorous intensity activity to be higher compared to that of moderate intensity  
37  
38 363 activity.[10,30,34,35] Compared to structured vigorous physical activities like sports and  
39  
40 364 exercise that can be more easily recalled, moderate intensity PA are often of low salience,  
41  
42 365 incidental and may not easily be remembered by people.[36,37] Further our finding that the  
43  
44 366 reliability of vigorous intensity physical activity was meaningfully higher among men than  
45  
46 367 women seem to confirm our previous findings with the IPAQ-SF.[21] Plausibly men in Nigeria  
47  
48 368 are more consistent than women when responding to PA items that pertained to intense vigorous  
49  
50 369 PA than other intensities of activity. Overall, the moderate to good evidence of reliability found  
51  
52 370 for all items indicate that the modified IPAQ-LF is reproducible, internally consistent and is  
53  
54 371 promising for research in Nigeria.  
55

56 372  
57 373 Except for sitting time, the limits of agreement in the mean scores of total PA and MVPA  
58  
59 374 between the first and second administrations were wide, suggesting an evidence of bias between  
60

1  
2  
3 375 administrations. Large difference in PA scores between the 2 administrations would indicate that  
4  
5 376 at least one of the two measurements is not accurate. However, similar to the finding of a  
6  
7 377 Mexican study,[38] scores on the Hausa IPAQ-LF were consistently lower during the second  
8  
9 378 administration of the questionnaire compared to the first administration. Because familiarity with  
10  
11 379 the IPAQ questions may improve over multiple exposures to the questionnaire, it is possible that  
12  
13 380 participants in our study might have over-reported their PA levels during the first administration  
14  
15 381 of the Hausa IPAQ-LF. This kind of findings may have implication for the utility of IPAQ for  
16  
17 382 surveillance. Generally, due to issues of social desirability phenomenon and over reporting of PA  
18  
19 383 that has been associated with the IPAQ,[39,40] it may be necessary to start considering the need  
20  
21 384 for multiple measurements when using the IPAQ for evaluating PA, especially in developing  
22  
23 385 African countries. However, patterns of PA as measured by the modified IPAQ-LF during both  
24  
25 386 administrations were consistently similar, and both administrations were able to discriminate PA  
26  
27 387 in the expected direction between subgroups of our sample. For example, at both measurement  
28  
29 388 time points, and consistent with hypothesis, men reported more time in active transportation,  
30  
31 389 occupational PA and leisure PA than women, while women reported more time in domestic PA  
32  
33 390 and sedentary activity than men.

34  
35 391  
36  
37 392 In the absence of objective criterion standards for evaluating an absolute estimate of PA, the  
38  
39 393 consistency of items on IPAQ with variables known to be related to PA such as body mass index  
40  
41 394 (BMI), blood pressure, heart rate, indicators of lipid and glucose metabolism, and fitness index  
42  
43 395 have been used as important construct validity measures.[7,10,21,24] In the present study, the  
44  
45 396 correlations of the PA domains and intensities with biological and anthropometric variables were  
46  
47 397 mostly significant in the expected direction, but they were low suggesting a modest evidence of  
48  
49 398 construct validity for the modified IPAQ-LF in Nigeria. However, observed correlations were  
50  
51 399 comparable with the values in other studies that have evaluated the IPAQ-LF.[5,7,8,24,30,33,39]  
52  
53 400 Because better validity coefficients have been reported for other PA measures above that of the  
54  
55 401 IPAQ,[39,41] with the present African finding, it is possible that the IPAQ-LF only have modest  
56  
57 402 evidence of construct validity. However, our findings on the relationships between physical  
58  
59 403 activity and biological and anthropometric variables should be interpreted in the light of an  
60  
404 important caution. Because hypertensive and obese people may get oriented to exercise,[3] cross-

1  
2  
3 405 sectional associations of physical activity and blood pressure or BMI could also occur in the  
4  
5 406 opposite direction and may not represent much information as indicators of construct validity of  
6  
7 407 physical activity measures.  
8  
9 408

### 10 409 **Strengths and limitations**

11  
12  
13 410 A strength of this study is the systematic adaptation and tailoring of items on the IPAQ-LF to  
14  
15 411 reflect the common PA behaviours of people in Nigeria. This is the first study in an African  
16  
17 412 country to explore the cultural adaptation and translation of the IPAQ-LF, and its findings  
18  
19 413 demonstrated the feasibility of using the IPAQ-LF to reliably collect PA data in a diverse  
20  
21 414 segment of the Nigerian population. In the Africa region, the importance of a valid and  
22  
23 415 established PA scale like the modified IPAQ-LF is not only important to monitoring the domain  
24  
25 416 in which activity is performed, but also very critical to understanding studies of ecological  
26  
27 417 models of health behaviours, that emphasize the importance of multiple levels of influence on  
28  
29 418 health behaviours including PA.[18,42] In Nigeria, emerging evidence from studies using  
30  
31 419 ecological models indicate that favourable built environmental attributes are promising for  
32  
33 420 improving total and moderate-to-vigorous PA and controlling obesity among adults.[26, 43-45]  
34  
35 421 However, built environment characteristics are expected to be strongly related to specific PA  
36  
37 422 types rather than overall PA.[46,47] For example, different environmental variables can be  
38  
39 423 related to walking for leisure or transportation and to moderate PA for household, occupation,  
40  
41 424 recreation or transportation. Thus, a study of adaptation of the IPAQ-LF is very important to  
42  
43 425 understanding the domain specific nature of ecological models research in the African region.  
44  
45 426 One additional strength was the exploration of PA patterns by gender, educational level and  
46  
47 427 employment status, the findings of which were consistent with general hypothesis on social  
48  
49 428 patterns of inactivity in low-income countries.[20,48]  
50  
51 429

52  
53 430 However, the findings of this study should be interpreted in the light of some important  
54  
55 431 limitations. Direct comparison of our validity findings with previous studies should be made with  
56  
57 432 caution, because unlike in our study, the accelerometer or PA diary were utilized as a common  
58  
59 433 objective criterion standard to validate the IPAQ in the majority of the  
60  
434 studies.[5,7,8,24,30,33,39] Thus, examining the construct validity through the relationships of

1  
2  
3 435 PA with BMI and resting blood pressure was an important limitation of our study. The choice  
4  
5 436 and availability of appropriate criterion measures are particular issues of concern for the  
6  
7 437 validation of PA questionnaires in low-income countries of Africa [5,49,50]. Despite these  
8  
9 438 issues, the validity coefficients in our study were remarkably similar to those reported in other  
10  
11 439 studies, [5,7,8,24,30,33,39] and the consistency of items on IPAQ with variables known to be  
12  
13 440 related to PA such as BMI, blood pressure, heart rate, indicators of lipid and glucose metabolism,  
14  
15 441 and fitness index have previously been used as important construct validity  
16  
17 442 measures.[7,10,21,24] Another limitation of the study is the use of non-probability sampling  
18  
19 443 technique. The study finding may have limited generalizability to other samples of Nigerians that  
20  
21 444 have different characteristics from this sample. In addition, the majority of participants have  
22  
23 445 more than secondary school education with potentially higher comprehension and recall ability  
24  
25 446 than may be found in the general population. Nevertheless, recruitment from diverse  
26  
27 447 neighbourhoods and settings allowed for a sample with reasonable heterogeneity in age,  
28  
29 448 occupational status, and ethnic backgrounds and made it possible to stratify the analyses by  
30  
31 449 sociodemographic characteristics. However, because some of the participants in the present  
32  
33 450 study required assistance to complete the survey, interview administration rather than self-  
34  
35 451 administration of the IPAQ-LF should be encouraged in any future national studies in the  
36  
37 452 African region. Administering the IPAQ through interview has been considered as a viable and  
38  
39 453 preferred option in developing countries.[5]  
40  
41 454

## 455 **Conclusions**

456 Overall, the present study suggests that the modified IPAQ-LF demonstrated sufficient evidence  
457  
458 of test-retest reliability and may be valid for assessing context specific PA behaviours of adults  
459  
460 in Nigeria. Adaptation and criterion evaluation of the IPAQ-LF in other African countries could  
461  
462 further contribute to our understanding of the impact of multiple levels of influence on PA  
463  
464 behaviours of people in the African region.

1  
2  
3 465**Acknowledgments**

467 The authors are grateful to Mrs. Salamatu U Aliyu and Mr. Sa'adu Inusa Kiriri for their help  
468 with questionnaire translations, and to the participants for their help for taking part in the study.

469

**Contributors**

470  
471 ALO conceived and designed the study, contributed to cultural adaptation and acquisition of  
472 data, conducted the statistical analysis and interpretation of data and drafted the manuscript.  
473 UMB and STP managed participants' recruitment and data collection and contributed to cultural  
474 adaptation. HBN and RDM contributed to cultural adaptation and translations of the measure.  
475 AYO contributed to study design, acquisition of data and critically revised the manuscript for  
476 important intellectual contents. All authors read and approved the final manuscript.

477

**Funding**

478  
479 This research received no specific grant from any funding agency in the public, commercial or  
480 not-for-profit sectors.

481

**Competing interests**

482  
483 Authors declare there is no competing interest associated with this study.

484

**Ethics approval**

485  
486 Research and Ethic Committee of the University of Maiduguri Teaching Hospital, Nigeria  
487 (ADM/TH/EC/75).

488

**Data sharing process**

489  
490 Dataset for this study available upon request from the corresponding author.

491

492

493

494

495

496

497

498

499

500

494

495 **References**

496

497 1. Garber CE, Blissmer B, Deschenes MR, *et al.* for the American College of Sports Medicine.

498 Quantity and quality of exercise for developing and maintaining cardiorespiratory,

499 musculoskeletal, and neuromotor fitness in apparently healthy adults: guidance for

500 prescribing exercise. *Med Sci Sports Exerc* 2011;43:1334-1359.

501

502 2. World Health Organization. Global recommendations on physical activity for health. WHO,

503 Geneva, Switzerland; 2010.

504

505 3. Haskell WL, Lee I-M, Pate RP, *et al.* Physical activity and public health: updated

506 recommendation for adults from the American College of Sports Medicine and the American

507 Heart Association. *Circulation* 2007;116:1081-1093.

508

509 4. World Health Assembly 57.17. *Global strategy on diet and physical activity*. Geneva: World

510 Health Organization. May 2004.

511

512 5. Craig CL, Marshall, AL, Sjostrom M, *et al.* International physical activity questionnaire: 12513 country reliability and validity. *Med Sci Sports Exerc* 2003;35(8):1381-1395.

514

515 6. The IPAQ group. International physical activity questionnaire. 2014 Available at:

516 <http://www.ipaq.ki.se/scoring.pdf>. Accessed May 21, 2014.

517

518 7. Hagstromer M, Oja P, Sjostrom M. The international physical activity questionnaire (IPAQ)

519 a study of concurrent and construct validity. *Public Health Nutr* 2006;9:755-762.

520

521 8. Hagstromer M, Ainsworth BE, Oja P, *et al.* Comparison of a subjective and an objective522 measure of physical activity in a population sample. *J Phys Act Health* 2010;7:541-550.

523

524 9. Maddison R, Mhurchu CN, Jiang Y, *et al.* International physical activity questionnaire

525 (IPAQ) and New Zealand physical activity questionnaire (NZPAP): A doubly labelled water

526 validation. *Int J Behav Nutr Phys Act* 2007;4:62.

527

528 10. Kurtze N, Rangun V, Hustveldt B. Reliability and validity of the international physical

529 activity questionnaire in the Nord-Trondelag Health Study (HUNT) population of men. *BMC*530 *Med Res Methodol* 2008;8:63.

531

532 11. Nicaise V, Marshall S, Ainsworth BE. Domain-specific physical activity and self-report bias

533 among low-income Latinas living in San Diego county. *J Phys Act Health* 2011;8:881-890.

534

535 12. Vandelanotte C, De Bourdeaudunij I, Philippaerts R, *et al.* Reliability and validity of a

536 computerized and Dutch version of the International Physical Activity Questionnaire (IPAQ).

537 *J Phys Act Health* 2005;2;63-75.

538



- 1  
2  
3 538  
4 539 13. Loney T, Standage M, Thompson D, *et al.* Self-Report vs. objectively assessed physical  
5 540 activity: which is right for public health? *J Phys Act Health* 2011;8:62-70.  
6 541  
7 542 14. Mackay LM, Oliver M, Schofield GM. Demographic variations in discrepancies between  
8 543 objective and subjective measures of physical activity. *Open Journal of Preventive Medicine*  
9 544 2011;1:13-19.  
10 545  
11 546 15. Kolbe-Alexander TL, Lambert EV, Harkins JB *et al.* Comparison of two methods of  
12 547 measuring physical activity in South African older adults. *J Aging Phys Act* 2006;14:98-114.  
13 548  
14 549 16. Pratt M, Sarmiento OL, Montes F, *et al.* The implications of megatrends in information and  
15 550 communication technology and transportation for changes in global physical activity. *Lancet*  
16 551 2012;380:282-293.  
17 552  
18 553 17. Kohl 3<sup>rd</sup> HW, Criag CL, Lambert EV, *et al.* for the Lancet physical activity series working  
19 554 group. The pandemic of physical inactivity: global action for public health. *Lancet*  
20 555 2012;380:294-305.  
21 556  
22 557 18. Bauman AE, Reis RS, Sallis JF, *et al.* Correlates of physical activity: why are some physical  
23 558 active and others not? *Lancet* 2012;380:258-271.  
24 559  
25 560 19. Heath GW, Parra DC, Sarmiento OL, *et al.* Evidence-based intervention in physical activity:  
26 561 lessons from around the world. *Lancet* 2012;380:278-281.  
27 562  
28 563 20. Hallal PC, Andersen LB, Bull FC, *et al.* for the Lancet physical activity series working  
29 564 group. Global physical activity levels: surveillance progress, pitfalls, and prospects. *Lancet*  
30 565 2012;380:247-257.  
31 566  
32 567 21. Oyeyemi AL, Oyeyemi AY, Adegoke BOA, *et al.* Cross-cultural adaptation of the  
33 568 international physical activity questionnaire: reliability and validity of the Hausa version in  
34 569 Nigeria. *BMC Med Res Methodol* 2011;11:156.  
35 570  
36 571 22. Chu AH, Moy FM. Reliability and validity of the Malay international physical activity  
37 572 questionnaire (IPAQ-M) among a Malay population in Malaysia. *Asia Pac J Public Health*  
38 573 2013 Apr 17 [Epub ahead of print].  
39 574  
40 575 23. Chun MY. Validity and reliability of Korean version of international physical activity  
41 576 questionnaire short form in the elderly. *Korean J Fam Med* 2012;33:144-151.  
42 577  
43 578 24. Graff-Iversen S, Anderssen SA, Holme IM, *et al.* An adapted version of the long  
44 579 international physical activity questionnaire (IPAQ L): Construct validity in a low income,  
45 580 multiethnic population study from Oslo, Norway. *Int J Behav Nutr Phys Act* 2007;4:13.  
46 581  
47  
48  
49  
50  
51  
52  
53  
54  
55  
56  
57  
58  
59  
60

- 1  
2  
3 582 25. Lee IM, Shiroma EJ, Lobelo F, *et al.* for the Lancet physical activity series working group  
4 583 Effect of physical inactivity on major non-communicable diseases worldwide: an analysis of  
5 584 burden of diseases and life expectancy. *Lancet* 2012;380:219-229.  
6 585  
7  
8 586 26. Oyeyemi AL, Sallis JF, Deforche B, *et al.* Evaluation of the Neighborhood Environment  
9 587 Walkability Scale in Nigeria. *Int J Health Geogr* 2013;12:16.  
10 588  
11 589 27. National Bureau of Statistics. Statistical fact sheet and population census. Federal Republic  
12 590 of Nigeria 2008. Available: <http://www.nigerianstat.gov.ng> Accessed 28 August 2012.  
13 591  
14 592 28. National Population Commission (NPC) [Nigeria] and ORC Macro (2004) Nigeria  
15 593 Demographics and Health Survey 2003. Calverton, Maryland: National Population  
16 594 Commission and ORC Macro  
17 595  
18 596 29. World Health Organization. Obesity: Preventing and Managing the Global Epidemic. WHO  
19 597 Technical Report Series 894. 2000. World Health Organization; 2000. Available:  
20 598 [http://whqlibdoc.who.int/trs/WHO\\_TRS\\_894.pdf](http://whqlibdoc.who.int/trs/WHO_TRS_894.pdf) Accessed 23 August 2013.  
21 599  
22 600 30. Vasheghani-Farahani A, Tahmusbi M, Sheri H, *et al.* The Persian, last 7-day, long form of  
23 601 the International Physical Activity Questionnaire: Translation and validation study. *Asian J*  
24 602 *Sports Med* 2011;2(2)106-116.  
25 603  
26 604 31. Portney L, White M. Foundations of clinical research. Applications to practice. New Jersey:  
27 605 Pearson Education Inc, 2009  
28 606  
29 607 32. Bland JM, Altman DG. Statistical methods for assessing agreement between two methods of  
30 608 clinical measurement. *Lancet*, 1986;1:307-310.  
31 609  
32 610 33. Levy SS, Readdy RT. Reliability of the international physical activity questionnaire in  
33 611 research setting: last 7-day self-administered long form. *Meas Phys Educ Exerc Sci*  
34 612 2009;13:191-205.  
35 613  
36 614 34. Macfarlane D, Chan A, Cerin E. Examining the validity and reliability of the Chinese version  
37 615 of the International Physical Activity Questionnaire, long form (IPAQ-LC). *Public Health*  
38 616 *Nutr* 2010;14(3),443-450.  
39 617  
40 618 35. Papathanasiou G, Georgoudis G, Papandreou M, *et al.* Reliability measures of the short  
41 619 international physical activity questionnaire (IPAQ) in Greek young adults. *Hellenic J*  
42 620 *Cardiol* 2009;50:283-294.  
43 621  
44 622 36. Sallis JF, Saelens BE. Assessment of physical activity by self-report: status, limitations, and  
45 623 future directions. *Res Q Exerc Sport* 2000;71:1-14.  
46 624  
47 625 37. Washburn RA, Heath GW, Jackson AW. Reliability and validity issues concerning large-  
48 626 scale surveillance of physical activity. *Res Q Exerc Sport* 2000;71:104-113.

- 1  
2  
3 627  
4 628 38. Medina C, Barquera S, Janssen I. Validity and reliability of the International Physical  
5 629 Activity Questionnaire among adults in Mexico. *Rev panam salud publica* 2013;34(1):21-28.  
6 630  
7 631 39. Johnson-Kozlow M, Sallis JF, Gilpin EA, *et al.* Comparative validation of the IPAQ and the  
8 632 7-Day PAR among women diagnosed with breast cancer. *Int J Behav Nutr Phys Act*  
9 633 2006;3:7.  
10 634  
11 635 40. Rzewnicki R, Vanden Auweele Y, De Bourdeaudhuij I. Addressing over-reporting on the  
12 636 International Physical Activity Questionnaire (IPAQ) telephone survey with a population  
13 637 sample. *Public Health Nutr* 2003;6:299–305.  
14 638  
15 639 41. Aishworth BE, Macera CA, Jones DA *et al.* Comparison of the 2001 BRFSS and the IPAQ  
16 640 physical activity questionnaire. *Med Sci Sports Exerc* 2006;38(9):1584-1592.  
17 641  
18 642 42. Sallis JF, Owen N, Fisher EB. Ecological models of health behavior. In: Glanz K, Rimer BK,  
19 643 Viswanath K, eds. *Health Behavior and Health Education: Theory, Research, and Practice*,  
20 644 4<sup>th</sup> edn. San Francisco: *Jossey-Bass* 2008, 465-486  
21 645  
22 646 43. Oyeyemi AL, Adegoke BOA, Oyeyemi AY, *et al.* Perceived environmental correlates of  
23 647 physical activity and walking in African young adults. *Am J Health Promot* 2011;25 (5):e10-  
24 648 e19  
25 649  
26 650 44. Oyeyemi AL, Adegoke BOA, Oyeyemi AY, *et al.* Environmental factors associated with  
27 651 overweight among adults in Nigeria. *Int J Behav Nutr Phys Act* 2012, 9:32  
28 652  
29 653 45. Oyeyemi AL, Sallis JF, Adegoke BOA, *et al.* Perception of neighborhood safety is related  
30 654 with physical activity among adults in Nigeria. *BMC Public Health* 2012, 12:294  
31 655  
32 656 46. Giles-Corti B, Timperio A, Bull F, *et al.* Understanding physical activity environmental  
33 657 correlates: increased specificity for ecological models. *Exerc Sports Sci Rev.* 2005; 33  
34 658 (4):175-181.  
35 659  
36 660 47. Sallis JF, Cervero R, Ascher WW, *et al.* An ecological approach to creating active living  
37 661 communities. *Annu Rev Public Health* 2006;27:14.1-14.26  
38 662  
39 663 48. Dumith SC, Hallal PC, Reis RS, Kohl HW 3<sup>rd</sup>. Worldwide prevalence of physical and its  
40 664 association with human development index in 76 countries. *Prev Med* 2011;50:24-28  
41 665  
42 666 49. Oyeyemi AL, Umar M, Ugoche F, *et al.* Accelerometer-determined physical activity and its  
43 667 comparison with the International Physical Activity Questionnaire in a sample of Nigerian adults.  
44 668 *PLoS One*, 2014; 9 (1): e872333  
45 669  
46 670 50. Sobnqwi E, Mbanya JCN, Urwin NC, *et al.* Development and validation of a questionnaire  
47 671 for the assessment of physical activity in epidemiological studies in Sub-Saharan Africa. *Int J*  
48 672 *Epidemiol* 2001;30:1361-1368.

Table 1. Descriptive characteristics of the participants (N=180)

| Variables                          | Total sample<br>(N=180) | Men<br>(n=90, 50%) | Women<br>(n=90, 50%) |
|------------------------------------|-------------------------|--------------------|----------------------|
| <b>Age (years)</b>                 |                         |                    |                      |
| Mean ( $\pm$ SD)                   | 35.6 $\pm$ 10.3         | 35.7 $\pm$ 8.3     | 35.5 $\pm$ 11.9      |
| <b>Marital status (n, %)*</b>      |                         |                    |                      |
| Not Married                        | 74(41.1)                | 48(53.3)           | 26(28.9)             |
| Married                            | 106(58.9)               | 42(46.7)           | 64(71.1)             |
| <b>BMI (Kg/m<sup>2</sup>)</b>      |                         |                    |                      |
| Mean ( $\pm$ SD)                   | 23.8 $\pm$ 3.9          | 23.8 $\pm$ 3.5     | 23.8 $\pm$ 4.4       |
| <b>BMI Category (n, %)</b>         |                         |                    |                      |
| Underweight                        | 14 (7.8)                | 4 (4.4)            | 10 (11.1)            |
| Normal weight                      | 107 (59.4)              | 58 (64.4)          | 49 (54.4)            |
| Overweight/obese                   | 59 (32.8)               | 28 (31.2)          | 31 (34.5)            |
| <b>Ethnicity (n, %)</b>            |                         |                    |                      |
| Hausa/Fulani                       | 21(11.7)                | 10.1(11.1)         | 11(12.2)             |
| Igbo                               | 8(4.4)                  | 5(5.6)             | 3(3.3)               |
| Yoruba                             | 10(5.6)                 | 6(6.7)             | 4(4.4)               |
| Kanuri/Shuwa Arab                  | 44(24.4)                | 23(25.6)           | 21(23.3)             |
| Others                             | 97(53.9)                | 46 (51.1)          | 51(56.7)             |
| <b>Educational level (n, %)*</b>   |                         |                    |                      |
| > Secondary School                 | 111 (62.7)              | 11 (12.2)          | 17(19.5)             |
| Secondary                          | 38 (21.5)               | 10 (11.1)          | 28(32.5)             |
| <Secondary School                  | 28 (15.8)               | 69 (76.7)          | 42(48.2)             |
| <b>Occupational Status (n, %)*</b> |                         |                    |                      |
| Unemployed                         | 63(35)                  | 16(17.8)           | 47(52.2)             |
| Blue Collar                        | 45(25)                  | 28(31.1)           | 17(18.9)             |
| White Collar                       | 72(40)                  | 46(51.1)           | 26(28.9)             |

\*- Significant difference between samples ( $p < 0.05$ )

BMI- Body Mass Index

Table 2: Test-reliability based on intra-class correlation coefficient for Hausa IPAQ– LF, overall and by gender

| PA Measure (MET×min/wk)             | Total (N=180)      |                    |                  | Women (n=90)     | Men (n=90)         |
|-------------------------------------|--------------------|--------------------|------------------|------------------|--------------------|
|                                     | Test 1 (Mean (SD)) | Test 2 (Mean (SD)) | ICC (95%CI)      | ICC (95%CI)      | ICC (95%CI)        |
| Total PA, all domain                | 2160.6 (2691.1)    | 1612.8 (1612.8)    | 0.76 (0.65-0.82) | 0.45 (0.08-0.67) | 0.80 (0.69- 0.87)  |
| Occupation                          | 619.1(1671.5)      | 497.5 (1332.9)     | 0.77 (0.68-0.82) | 0.64 (0.46-0.77) | 0.78 (0.66 -0.85)  |
| Active Transport                    | 468.1 (684.7)      | 440.5 (605.7)      | 0.82 (0.75-0.87) | 0.63 (0.40-0.77) | 0.83 (0.73 - 0.89) |
| Domestic                            | 597.6 (754.6)      | 473.4 (673.7)      | 0.50 (0.32-0.62) | 0.38 (0.01-0.57) | 0.33 (-0.01-0.56)  |
| Leisure                             | 377.0 (1096.3)     | 196.7 (920.2)      | 0.71 (0.60-0.78) | 0.69 (0.53-0.79) | 0.75 (0.63-0.84)   |
| Sitting                             | 2263.0 (715.8)     | 2235.4 (818.9)     | 0.62 (0.42-0.75) | 0.71 (0.46-0.85) | 0.48 (0.06-0.72)   |
| <b>PA by Intensity (MET×min/wk)</b> |                    |                    |                  |                  |                    |
| Walking                             | 613.6 (635.6)      | 534.6 (449.1)      | 0.63 (0.48-0.74) | 0.57 (0.29-0.74) | 0.65 (0.44-0.78)   |
| Moderate                            | 986.9 (1365.9)     | 716.1 (1164.6)     | 0.61 (0.46-0.71) | 0.42 (0.11-0.62) | 0.67 (0.49-0.78)   |
| Vigorous                            | 526.5 (1543.7)     | 394.1 (1431.1)     | 0.82 (0.76-0.87) | 0.55 (0.30-0.71) | 0.86 (0.78-0.91)   |

PA= Physical Activity

MET= Metabolic Energy Turnover

Table 3: Socioeconomic status differences in test- retest reliability of the Hausa IPAQ- LF (N= 180)

| Socioeconomic Status               | Overall PA        | Active Transport  | Occupation PA     | Leisure PA        | Domestic PA      | Sitting           |
|------------------------------------|-------------------|-------------------|-------------------|-------------------|------------------|-------------------|
| <b>Educational Qualification</b>   |                   |                   |                   |                   |                  |                   |
| More than secondary school (n=111) | 0.42 (0.08-0.63)  | 0.67 (0.43-0.78)  | 0.32 (-0.06-0.57) | 0.33 (-0.05-0.57) | 0.58 (0.35-0.73) | 0.23 (-0.63-0.63) |
| Secondary School (n=38)            | 0.55 (0.22-0.74)  | 0.28 (-0.21-0.57) | 0.58 (0.33-0.74)  | 0.54 (0.25-0.71)  | 0.50 (0.19-0.69) | 0.51 (-0.04-0.76) |
| Less than Secondary school (n=28)  | 0.89 (0.67-0.96)  | 0.90 (0.74-0.96)  | 0.82 (0.61-0.92)  | 0.92 (0.83-0.96)  | 0.90 (0.78-0.95) | 0.77 (0.45-0.90)  |
| <b>Employment Category</b>         |                   |                   |                   |                   |                  |                   |
| Employed (117)                     | 0.80 (0.67-0.96)  | 0.83 (0.74-0.88)  | 0.79 (0.70-0.86)  | 0.79 (0.69-0.85)  | 0.36 (0.08-0.56) | 0.56 (0.23-0.75)  |
| Unemployed (63)                    | 0.09 (-8.86-0.56) | 0.68 (0.44-0.82)  | 0.16 (-0.39-0.49) | 0.25 (-0.24-0.55) | 0.65 (0.43-0.79) | 0.68 (0.36-0.80)  |

PA= Physical Activity

Table 4: Differences in time spent in physical activity overall, and by gender and socioeconomic status sub groups

|                                 | Gender             |                  |                    | Education               |                        |                         | Employment            |                         |
|---------------------------------|--------------------|------------------|--------------------|-------------------------|------------------------|-------------------------|-----------------------|-------------------------|
|                                 | Total<br>Mean ± SD | Men<br>Mean ± SD | Women<br>Mean ± SD | >Secondary<br>Mean ± SD | Secondary<br>Mean ± SD | <Secondary<br>Mean ± SD | Employed<br>Mean ± SD | Unemployed<br>Mean ± SD |
| <b>PA by domain (min/wk)</b>    |                    |                  |                    |                         |                        |                         |                       |                         |
| Total PA, all domain            |                    |                  |                    |                         |                        |                         |                       |                         |
| IPAQ1                           | 405.2 (507.8)      | 460.7 (582.9)    | 326.8 (367.8)      | 334.0 (400.8)           | 384.8 (514.8)          | 849.2 (764.1)**         | 441.1 (530.2)         | 285.1 (408.6)*          |
| IPAQ2                           | 308.4 (440.3)      | 319.7 (522.8)    | 291.9 (282.9)      | 285.1 (295.1)           | 184.8 (264.4)          | 803.0 (929.6)**         | 359.4 (481.6)         | 141.0 (185.2)*          |
| Active Transport                |                    |                  |                    |                         |                        |                         |                       |                         |
| IPAQ1                           | 35.8 (89.7)        | 52.4 (127.7)     | 19.5 (17.7)*       | 28.3 (47.7)             | 28.9 (45.02)           | 76.4 (198.7)*           | 43.8 (109.4)          | 21.1 (21.9)*            |
| IPAQ2                           | 30.4 (76.7)        | 41.2 (106.3)     | 19.3 (17.5)*       | 23.6 (30.6)             | 20.3 (30.9)            | 74.3 (182.6)*           | 36.9 (94.1)           | 18.3 (14.7)*            |
| Work                            |                    |                  |                    |                         |                        |                         |                       |                         |
| IPAQ1                           | 160.1 (380.8)      | 217.5 (466.8)    | 79.1 (179.9)*      | 114.8 (291.0)           | 122.9 (365.6)          | 546.7 (615.7)**         | 195.5 (418.8)         | 41.8 (162.2)*           |
| IPAQ2                           | 135.3 (310.3)      | 172.5 (372.8)    | 80.6 (171.9)*      | 104.1 (232.2)           | 160.9 (196.1)          | 531.6 (595.8)**         | 164.1 (341.7)         | 40.1 (133.0)*           |
| Domestic                        |                    |                  |                    |                         |                        |                         |                       |                         |
| IPAQ1                           | 159.6 (202.2)      | 82.3 (120.6)     | 236.9 (235.8)**    | 141.2 (182.4)           | 173.3 (238.5)          | 165.4 (159.4)           | 132.1 (170.7)         | 210.6 (243.8)*          |
| IPAQ2                           | 123.9 (163.9)      | 52.4 (74.9)      | 195.5 (190.1)**    | 131.9 (182.5)           | 107.6 (130.4)          | 147.3 (189.1)           | 112.6 (163.9)         | 205.0 (163.3)*          |
| Leisure                         |                    |                  |                    |                         |                        |                         |                       |                         |
| IPAQ1                           | 62.4 (159.1)       | 75.0 (211.1)     | 10.5 (27.3)**      | 47.0 (97.3)             | 92.7 (209.4)           | 38.2 (160.1)            | 69.7 (157.6)          | 48.7 (162.3)            |
| IPAQ2                           | 30.5 (118.2)       | 50.6 (160.7)     | 10.1 (38.5)**      | 23.4 (51.4)             | 24.7 (91.4)            | 71.5 (256.5)            | 43.1 (143.5)          | 17.0 (28.7)*            |
| Sitting                         |                    |                  |                    |                         |                        |                         |                       |                         |
| IPAQ1                           | 2263.0 (715.8)     | 2188.8 (759.7)   | 2330.7 (674.8)     | 2280.0 (618.7)          | 2433.9 (693.7)         | 2180.9 (760.8)          | 2159.4 (775.9)        | 2337.6 (667.2)          |
| IPAQ2                           | 2235.4 (819.9)     | 2208.7 (916.9)   | 2259.6 (728.1)     | 2420.7 (638.7)          | 2215.3 (663.1)         | 2160.0 (1111.4)         | 2170.6 (870.5)        | 2282.0 (785.5)          |
| <b>PA by Intensity (min/wk)</b> |                    |                  |                    |                         |                        |                         |                       |                         |
| Walking                         |                    |                  |                    |                         |                        |                         |                       |                         |
| IPAQ1                           | 178.5 (221.5)      | 241.1 (271.9)    | 128.2 (100.8)*     | 194.4 (268.1)           | 133.4 (85.6)           | 266.9 (285.4)*          | 192.0 (245.7)         | 133.3 (96.2)*           |
| IPAQ2                           | 142.5 (141.8)      | 148.5 (137.9)    | 133.7 (147.9)      | 151.7 (138.4)           | 103.6(94.7)            | 200.3 (209.1)*          | 150.7 (146.6)         | 115.4 (122.7)           |
| Moderate                        |                    |                  |                    |                         |                        |                         |                       |                         |
| IPAQ1                           | 201.9 (326.9)      | 193.0 (214.5)    | 214.5 (247.8)      | 187.3 (266.5)           | 194.9 (386.5)          | 309.7 (381.7)           | 221.2 (347.4)         | 137.7 (239.9)           |
| IPAQ2                           | 133.9 (238.5)      | 114.2 (276.9)    | 162.7 (165.6)      | 132.9 (177.8)           | 88.0 (197.2)           | 319.0 (482.1)*          | 153.9 (266.2)         | 68.0 (76.4)*            |
| Vigorous                        |                    |                  |                    |                         |                        |                         |                       |                         |
| IPAQ1                           | 94.1 (211.8)       | 123.7 (249.6)    | 52.2 (133.2)*      | 32.9 (81.9)             | 129.5 (208.2)          | 268.0 (459.7)**         | 90.2 (214.6)          | 127.1 (204.6)           |
| IPAQ2                           | 78.4 (206.9)       | 86.8 (227.4)     | 46.2 (73.4)        | 52.2 (140.2)            | 55.2 (127.0)           | 292.8 (461.5)**         | 92.8 (226.9)          | 130.9 (107.8)           |

1 PA= Physical Activity  
2 \*=p<0.05  
3 \*\*=p<0.001  
4  
5  
6  
7  
8  
9

For peer review only

10  
11  
12  
13  
14  
15  
16  
17  
18  
19  
20  
21  
22  
23  
24  
25  
26  
27  
28  
29  
30  
31  
32  
33  
34  
35  
36  
37  
38  
39  
40  
41  
42  
43  
44  
45  
46  
47  
48  
49



Table 5: Construct validity of Hausa IPAQ-LF: Spearman correlations between energy expenditure (MET×min/wk) from Hausa IPAQ– LF, and anthropometric and biological variables (N=180)

| MET×min/wk          | Overall (N = 180) |        |         | Female (n = 90) |         |         | Male (n = 90) |         |       |
|---------------------|-------------------|--------|---------|-----------------|---------|---------|---------------|---------|-------|
|                     | BMI               | DBP    | SBP     | BMI             | DBP     | SBP     | BMI           | DBP     | SBP   |
| <b>PA Domains</b>   |                   |        |         |                 |         |         |               |         |       |
| Total PA            | -0.29**           | -0.17* | -0.09   | -0.09           | -0.23** | -0.04   | -0.41**       | -0.08   | -0.14 |
| Occupation PA       | -0.12             | -0.09  | 0.01    | 0.02            | 0.02    | -0.05   | -0.22**       | -0.17   | -0.08 |
| Active transport PA | -0.05             | -0.04  | -0.01   | -0.10           | -0.13   | -0.02   | -0.04         | -0.02   | -0.80 |
| Domestic PA         | -0.07             | -0.17* | -0.26** | -0.23**         | -0.20*  | -0.31** | 0.04          | -0.14   | -0.04 |
| Leisure PA          | 0.09              | -0.08  | -0.16*  | -0.11           | 0.02    | 0.08    | -0.39**       | -0.12   | -0.06 |
| Sitting             | 0.16              | -0.09  | 0.04    | 0.19            | 0.12    | 0.05    | 0.15          | -0.09   | 0.05  |
| <b>PA Intensity</b> |                   |        |         |                 |         |         |               |         |       |
| Walking             | 0.90              | -0.09  | -0.03   | 0.19            | -0.05   | 0.08    | -0.05         | -0.11   | -0.15 |
| Moderate            | -0.02             | 0.21*  | 0.16*   | 0.02            | -0.14   | -0.08   | 0.02          | -0.25** | -0.16 |
| Vigorous            | -0.11*            | -0.06  | 0.03    | -0.16           | 0.01    | 0.02    | -0.13*        | -0.12   | -0.11 |

MET= Metabolic Energy Turnover

BMI= Body Mass Index

DBP= Diastolic Blood Pressure

SBP= Systolic Blood Pressure

PA= Physical activity

\*=p<0.05,

\*\*=p<0.01

1  
2  
3  
4  
5  
6  
7  
8  
9  
10  
11  
12  
13  
14  
15  
16  
17  
18  
19  
20  
21  
22  
23  
24  
25  
26  
27  
28  
29  
30  
31  
32  
33  
34  
35  
36  
37  
38  
39  
40  
41  
42  
43  
44  
45  
46  
47  
48  
49  
50  
51  
52  
53  
54  
55  
56  
57  
58  
59  
60

For peer review only

1  
2  
3 1 **Examining the reliability and validity of a modified version of the International Physical**  
4 **Activity Questionnaire, long form (IPAQ-L) in Nigeria: A cross-sectional study**  
5  
6  
7 3

8  
9 4 Adewale L. Oyeyemi\*<sup>1</sup>, Umar M. Bello<sup>1</sup>, Saratu T. Philemon<sup>2</sup>, Habeeb N. Aliyu<sup>1</sup>, Rebecca W.  
10 Majidadi<sup>1</sup>, Adetoyeje Y. Oyeyemi<sup>1</sup>  
11  
12 6

13  
14 7 <sup>1</sup>Department of Physiotherapy, College of Medical Sciences, University of Maiduguri,  
15 Nigeria  
16 8

17 9 <sup>2</sup> Department of Physiotherapy, Jos University Teaching Hospital, Nigeria  
18 10

19 11  
20 12  
21  
22 13 \*Correspondence to Dr. Adewale L. Oyeyemi, Department of Physiotherapy, College of  
23 14 Medical Sciences, University of Maiduguri, Nigeria. Email: [alaoyeyemi@yahoo.com](mailto:alaoyeyemi@yahoo.com);  
24 15 Telephone: +234-802-945-8230  
25  
26 16  
27 17

28 18 **Key words:** Physical activity, measurement, public health, IPAQ, Nigeria  
29 19  
30 17

31 18  
32 19  
33 20  
34 21  
35 22  
36 23  
37 24  
38 25  
39 26  
40 27  
41 28  
42 29  
43 30  
44 31  
45 32  
46  
47  
48  
49  
50  
51  
52  
53  
54  
55  
56  
57  
58  
59  
60

20 **Word counts:** 4352

1  
2  
3 33 **ABSTRACT**  
4

5 34 **Objectives:** To investigate the reliability and aspect of validity of a modified version of the long  
6  
7 35 International Physical Activity Questionnaire (Hausa IPAQ-LF) in Nigeria.

8  
9 36 **Design:** Cross-sectional study, examining the reliability and construct validity of the Hausa  
10  
11 37 IPAQ-LF compared with anthropometric and biological variables.

12 38 **Setting:** Metropolitan Maiduguri, the capital city of Borno State in Nigeria.

13  
14 39 **Participants:** 180 Nigerian adults (50% women) with a mean age of 35.6 (SD=10.3) years,  
15  
16 40 recruited from neighbourhood with diverse socioeconomic status and walkability.

17  
18 41 **Outcome measures:** Domains (domestic physical activity [PA], occupational PA, leisure-time  
19  
20 42 PA, active transportation and sitting time) and intensities of PA (vigorous, moderate and  
21  
22 43 walking) were measured with the Hausa IPAQ-LF on two different occasions, eight days apart.  
23  
24 44 Outcomes for construct validity were measured BMI, SBP and DBP.

25 45 **Results:** The Hausa IPAQ-LF demonstrated good test-retest reliability (ICC>75) for total PA  
26  
27 46 (ICC=0.79, 95% CI=0.65-0.82), occupational PA (ICC=0.77, 95% CI=0.68-0.82), active  
28  
29 47 transportation (ICC=0.82, 95% CI=0.75-0.87) and vigorous intensity activities (ICC=0.82, 95%  
30  
31 48 CI=0.76-0.87). Reliability was substantially higher for total PA (ICC=0.80), occupational PA  
32  
33 49 (ICC=0.78), leisure-time PA (ICC=0.75) and active transportation (ICC=0.80) in men than  
34  
35 50 women, but domestic PA (ICC=0.38) and sitting time (ICC=0.71) demonstrated substantial  
36  
37 51 reliability coefficients in women than men. For the construct validity, domestic PA was  
38  
39 52 significantly related mainly with SBP ( $\rho = -0.27$ ) and DBP ( $\rho = -0.17$ ), and leisure-time PA and  
40  
41 53 total PA were significantly related only with SBP ( $\rho = -0.16$ ) and BMI ( $\rho = -0.29$ ), respectively.  
42  
43 54 Similarly, moderate-intensity PA was mainly related with SBP ( $\rho = -0.16$ ,  $p < 0.05$ ) and DBP ( $\rho$   
44  
45 55 =  $-0.21$ ,  $p < 0.01$ ), but vigorous-intensity PA was only related with BMI ( $\rho = -0.11$ ,  $p < 0.05$ ).

46 56 **Conclusions:** The modified Hausa IPAQ-LF demonstrated sufficient evidence of test-retest  
47  
48 57 reliability and may be valid for assessing context specific PA behaviours of adults in Nigeria.  
49  
50 58  
51 59  
52 60

## ARTICLE SUMMARY

### Strengths and limitations of this study.

- Systematic adaptation and tailoring of items on the original IPAQ-LF to reflect the common PA behaviours of adults in Nigeria.
- The first study to describe the cultural adaptation and translations of the IPAQ-LF and explore its psychometric relevance in an African country.
- Findings establish evidence to support the feasibility of using a modified IPAQ-LF to reliably collect context specific PA behaviours of adults in the African region.
- Exploring construct validity through the relationships of PA with BMI and resting blood pressure was an important limitation of this study.
- The use of non-probability sampling technique may limit generalizability of findings to other samples of Nigerian adults with different characteristics from the study's sample.

## 106 INTRODUCTION

107  
108 The importance of physical activity (PA) for promoting health and preventing disease is well  
109 established.[1-3] However, for effective health promotion and PA surveillance and monitoring, it  
110 is important to have standardized, reliable and valid instruments that can be used to accurately  
111 describe population levels and patterns of PA within and across countries.[4, 5] In this context,  
112 the international physical activity questionnaire (IPAQ) was developed to obtain internationally  
113 comparable data on health-related PA of adults (18-65 years).[5, 6] Two versions of the IPAQ  
114 that could be administered by interview or self-completed were developed. The short form (SF)  
115 was designed for population surveillance of PA; while the long form (LF) was designed to be  
116 appropriate for use in research that requires detailed information on different PA domains,  
117 including PA at work, household, during leisure and transportation, and time spent in sedentary  
118 activities.[6]

119  
120 The initial evaluation of the IPAQ across 12 countries produced acceptable evidence of  
121 reliability and validity that are as good as other self-report measures of PA.[5] Consequently, in  
122 order to enhance the utility of IPAQ and to further evaluate its psychometrics worldwide, efforts  
123 have been made to translate and adapt the IPAQ in many other countries, but most of the  
124 research in this context were from the Western developed countries.[7-14] In Africa, the  
125 psychometric properties of IPAQ have only been tested in South-Africa as part of the initial  
126 development process of the questionnaire,[5] and in older adults.[15] Because the largest  
127 increases and burden of non-communicable diseases (NCDs) are in the low-income countries  
128 where the understanding of evidence-based strategies for increasing PA remains poor,[16-19]  
129 improving PA research is a top priority for low-income countries.[20] However, to advance PA  
130 research in Africa, it is important to first develop or tailor standardized measures to be culturally  
131 sensitive to PA behaviours of people in the region countries. Because Nigeria is the most  
132 populous country in Africa with culture and languages similar to most of the other West African  
133 countries, it is a good choice to evaluate the IPAQ for cultural and psychometric relevance in this  
134 country.

135

1  
2  
3 136 Recently, a cultural adaptation study of the IPAQ-SF was conducted among adults in  
4  
5 137 Nigeria,[21] with good evidence of test-retest reliability similar to findings in some other  
6  
7 138 studies.[10, 22-24] However, because the IPAQ-SF is not domain specific and does not provide  
8  
9 139 context specific information on PA behaviour, it is important to evaluate the IPAQ-LF for  
10  
11 140 relevance in Nigeria. Psychometric evaluation of a culturally modified version of the IPAQ-LF  
12  
13 141 in sub-Saharan African countries can impact PA research and surveillance in the African region  
14  
15 142 where the prevalence of inactivity related NCDs is on the increase.[20, 25] The aim of the  
16  
17 143 present study was to investigate the reliability and an aspect of validity of a modified version of  
18  
19 144 the IPAQ-LF among adults in Nigeria.  
20

## 21 146 **METHODS**

### 24 148 **Participants**

25  
26 149 A purposive sample of 180 adults from eight neighbourhoods that varied in socioeconomic status  
27  
28 150 and walkability in Maiduguri city were recruited for the study. The sampling and neighbourhood  
29  
30 151 selection strategy have been described in details elsewhere.[26] Maiduguri with an estimated  
31  
32 152 population of 749,123 people is the largest and capital city of Borno State in North-Eastern  
33  
34 153 Nigeria.[27] The city attracts immigrants from neighbouring countries of Cameroon, Niger and  
35  
36 154 Chad Republic, and Hausa language is the common means of communication for commercial  
37  
38 155 activities among the diverse inhabitants of Maiduguri.[27, 28] Participants were eligible for this  
39  
40 156 study if they were willing to self-complete a written survey twice in either Hausa or English  
41  
42 157 Language. However, researchers (UMB and STP) were in attendance to provide translation and  
43  
44 158 interpretation assistance to participants (n=11) who required help to complete the survey.  
45  
46 159 Additional eligibility criteria included living within the identified neighbourhood categories in  
47  
48 160 the last 12 months, being adults (18-65 years) and not having any disability that prevented  
49  
50 161 independent walking. All participants were fully informed of the study protocol and provided  
51  
52 162 signed informed consent. The study protocol was approved by the Research and Ethic  
53  
54 163 Committee of the University of Maiduguri Teaching Hospital, Maiduguri, Nigeria. Data were  
55  
56 164 collected between March and May, 2012.  
57  
58  
59  
60

1  
2  
3 166 **Measures**

4  
5 167 *The adapted international physical activity questionnaire- long Hausa version*

6  
7 168 The cultural adaptation, translation and back translation of the Hausa version of IPAQ-LF is  
8  
9 169 similar to that of the Hausa IPAQ-SF that has been described in details elsewhere.[21] Briefly,  
10  
11 170 interviews were conducted with public health experts, exercise scientists and not highly educated  
12  
13 171 local people to identify the items and examples of PA on the original questionnaires that needed  
14  
15 172 to be culturally adapted. Several cultural adaptations were made to the original items to reflect  
16  
17 173 the reality in Nigeria. First, adjustments to English words like vigorous and moderate activity  
18  
19 174 that can be misunderstood and not associated with PA behaviours in Nigeria were replaced with  
20  
21 175 words that are more representative of the language used in Nigeria, like 'very hard' and 'hard'  
22  
23 176 respectively. Second, examples of various intensities of activity that were common in the  
24  
25 177 Nigerian culture were added, and those already on the questionnaire but not common in the  
26  
27 178 Nigerian context were replaced with culturally applicable examples that are equivalent in energy  
28  
29 179 intensity (METs) with the original items and examples. Third, concepts like physical activity and  
30  
31 180 walking for transportation that were misconstrued outside the health context were refined to  
32  
33 181 indicate they were referring to health behaviours.

34  
35 182  
36 183 After adaptation, the questionnaire was independently translated from English into Hausa  
37  
38 184 language by two native speakers of Hausa who also speaks English, and able to read and write in  
39  
40 185 both languages. One of the translators was familiar with the questionnaire and the second was an  
41  
42 186 expert in Hausa language. The translated questionnaires were mutually revised by the translators  
43  
44 187 and the research team for consistency and then back translated into English language by a third  
45  
46 188 bilingual person who was familiar with the construct measured by IPAQ. The back translated  
47  
48 189 version was checked by the research team for any discrepancies and to ensure that the construct  
49  
50 190 measures by IPAQ had not been lost during the adaptation and translation process.

51  
52 191  
53 192 The modified questionnaire (available in both Hausa and English language), hereafter referred to  
54  
55 193 as the Hausa version of the long international physical activity questionnaire (Hausa IPAQ-LF),  
56  
57 194 contains thirty-one questions that asked about physical activity done in the last 7-days in terms of  
58  
59 195 frequency (days/week) and duration (minutes/day) spent in four activity domains (transportation,  
60



1  
2  
3 196 occupation, domestic and leisure time), and included sections on walking, moderate- and  
4  
5 197 vigorous- intensity activities, and time spent in sedentary behaviours (sitting during leisure and  
6  
7 198 motorized transportation). The Hausa IPAQ-LF data were presented as the MET-minute/week  
8  
9 199 for total walking, moderate, and vigorous intensity activity and overall physical activity across  
10  
11 200 the four domains, and in each of the domains. The MET intensity values used to score the Hausa  
12  
13 201 IPAQ-LF questions in this study were 8 METs for vigorous activity, 4 METs for moderate  
14  
15 202 activity and 3.3 METs for walking,[2, 6] One MET represents the energy expended while sitting  
16  
17 203 quietly at rest and is equivalent to 3.5 ml/kg/min of  $VO_2$  Max.[3] To assess the test-retest  
18  
19 204 reliability of the Hausa IPAQ-LF, participants self-completed all items on the measure twice,  
20  
21 205 with an interval of one week between administrations.

22

### 23 207 *Anthropometrical and biological measurements*

24  
25 208 Body weight (to nearest 0.5 kg) and Height (to nearest 0.1 cm) were measured in light clothing  
26  
27 209 using a digital scale and stadiometer. Body mass index (BMI) was calculated as body weight  
28  
29 210 divided by the square of height ( $kg/m^2$ ). The principal cutoff points as recommended by WHO  
30  
31 211 were used to create the categories: underweight ( $< 18.5 kg/m^2$ ), normal weight ( $18.5- < 25$   
32  
33 212  $kg/m^2$ ), overweight ( $25- < 30 kg/m^2$ ) and obese ( $\geq 30 kg/m^2$ ).[29] Resting blood pressure and heart  
34  
35 213 rate were measured with Digital Sphygmomanometer (Diagnostic Advanced Wrist Blood  
36  
37 214 Pressure Monitor, Model 6016, USA). Body mass index and resting diastolic blood pressure  
38  
39 215 (DBP) have previously been used for validating the IPAQ.[7,24] Similarly, for this study,  
40  
41 216 construct validity was evaluated by investigating the relationship of outcomes from the Hausa  
42  
43 217 IPAQ-LF with anthropometric (BMI) and biological (SBP and DBP) measurements, and also in  
44  
45 218 part by comparing the differences in time spent in PA and sitting across sociodemographic  
46  
47 219 subgroups. These types of validation for PA measures have been referred as indirect or construct  
48  
49 220 validity in previous studies.[7,24,30]

221

### 222 222 *Sociodemographic Characteristics*

223  
224 Information on age, gender, marital status, religion, income, educational level and employment  
225  
226 status were elicited from the participants. Marital status was classified as married or not married.  
227  
228 Educational level was classified as more than secondary school education, secondary school  
229  
230

1  
2  
3 226 education and less than secondary school education. Employment status was classified into white  
4  
5 227 collar (government or private employed), blue collar (self- employed, trader, artisan etc) and  
6  
7 228 unemployed (homemaker, student, retired, or unable to find job).  
8  
9

10 229

### 11 230 **Data Analysis**

12  
13 231 Descriptive data were reported as mean, standard deviation and percentages. Mean group  
14  
15 232 differences for continuous variables by gender were examined by independent t-test, and for  
16  
17 233 dichotomous variables by chi-square statistics. The reliability analyses were performed using 2  
18  
19 234 strategies. First, the two- way mixed model (single measure) intraclass correlation coefficient  
20  
21 235 (ICC) with 95% confidence interval (CI) between the continuous scores obtained on 1<sup>st</sup> and 2<sup>nd</sup>  
22  
23 236 administration of the Hausa IPAQ-LF was calculated. The ICCs were calculated overall, and by  
24  
25 237 gender and socioeconomic status. ICC estimates >0.75 were considered as good reliability  
26  
27 238 scores, between 0.50 and 0.75 as moderate reliability and <0.50 as poor reliability.[31] Second,  
28  
29 239 the Bland and Altman Method was used to assess agreement on scores of PA from the 1<sup>st</sup> and 2<sup>nd</sup>  
30  
31 240 administrations.[32] Variables used for the Bland and Altman analysis were weekly time spent in  
32  
33 241 moderate-to-vigorous activity (MVPA), total PA and sitting. MVPA was computed by summing  
34  
35 242 the total minutes/week of reported physical activity of moderate and vigorous- intensities across  
36  
37 243 all four domains. For total PA, the total minutes/week of activities in each domain were summed  
38  
39 244 (total work + total transport + total domestic + total leisure-time min/week scores) to gain an  
40  
41 245 overall estimate of physical activity in a week. Also, the independent t-test and one-Way  
42  
43 246 ANOVA were used as appropriate to compare the time spent (minutes/week) in PA at both  
44  
45 247 administrations across sociodemographic subgroups. To assess construct validity, the non-  
46  
47 248 parametric Spearman correlation coefficients ( $\rho$ ) were utilized to explore the relationship  
48  
49 249 between MET-min/week of PA from the Hausa IPAQ- LF, and resting blood pressure and body  
50  
51 250 mass index. Data were analyzed using Statistical Package for the Social Science (SPSS), version  
52  
53 251 15.0 for windows (SPSS Inc., Chicago, Illinois, USA) and the level of significance was set at  
54  
55 252  $p<0.05$ .  
56  
57 253

### 54 254 **RESULTS**

1  
2  
3 255 The socio-demographic characteristic of the participants are shown in Table 1. The participants  
4  
5 256 comprised 50% women and men, with a mean age of  $35.6 \pm 10.3$  years and body mass index of  
6  
7 257  $23.8 \pm 3.9\text{kg/m}^2$ . Majority of the participants were married (58.9%, n=106), had more than  
8  
9 258 secondary school education (62.7%, n=111) and were employed (75%, n=117). Compared to  
10  
11 259 men, the women were more likely to be married (71.1% vs 46.7%,  $p=0.001$ ) and unemployed  
12  
13 260 (52.2% vs 17.8%,  $p<0.001$ ), but men were more likely to have more than secondary school  
14  
15 261 education (76.7% vs 48.2%,  $p<0.001$ ).  
16

### 17 262

### 18 263 **Reliability**

19 264 Table 2 shows the test-retest reliability of the modified IPAQ-LF. Overall, reliability coefficients  
20  
21 265 were good ( $\text{ICC} > 0.75$ ) for total PA, occupational PA, active transportation and vigorous intensity  
22  
23 266 (very hard) PA. Domestic PA, sitting activity and leisure PA demonstrated moderate reliability  
24  
25 267 ( $\text{ICC}$  ranges from 0.51- 0.71). While, the reliability coefficients of total PA ( $\text{ICC}=0.80$ , 95%  
26  
27 268  $\text{CI}=0.69-0.87$ ), active transportation ( $\text{ICC}=0.83$ , 95%  $\text{CI}=0.73-0.89$ ), occupational PA  
28  
29 269 ( $\text{ICC}=0.78$ , 95%  $\text{CI}=0.66-0.85$ ) and leisure time PA ( $\text{ICC}=0.75$ , 95%  $\text{CI}=0.63-0.84$ ) were  
30  
31 270 substantially higher among men than women, reliability coefficients for domestic PA ( $\text{ICC}=0.38$ ,  
32  
33 271 95%,  $\text{CI}=0.01-0.57$ ) and sitting time ( $\text{ICC}=0.71$ , 95%  $\text{CI}=0.46-0.85$ ) were higher among women  
34  
35 272 than men. According to the intensity of PA,  $\text{ICCs}$  range between 0.61 and 0.82, with the lowest  
36  
37 273 value recorded for moderate intensity (hard) PA and the highest value for vigorous intensity  
38  
39 274 (very hard) PA. The reliability coefficients for walking, moderate-intensity (hard) and vigorous  
40  
41 275 intensity (very hard) activities were substantially greater in men than women.  
42

43 276

44 277 Similarly, socioeconomic status differences were observed in the reliability coefficients of the  
45  
46 278 modified IPAQ-LF (Table 3). Across all domains of PA, reliability coefficients were  
47  
48 279 substantially higher among participants with less than secondary school education ( $\text{ICC}$  from  
49  
50 280 0.77 [sitting activity] to 0.92 [leisure activity]) compared to those with secondary school  
51  
52 281 education ( $\text{ICC}$  from 0.28 [active transport] to 0.58 [occupational activity]) and those with higher  
53  
54 282 than secondary school education ( $\text{ICC}$  from 0.23 [sitting activity] to 0.67[active transport]).  
55  
56 283 While reliability coefficients were higher for overall PA ( $\text{ICC}=0.80$ , 95%  $\text{CI}=0.71- 0.86$ ), active  
57  
58 284 transport ( $\text{ICC}=0.83$ , 95%  $\text{CI}=0.74- 0.88$ ), occupational PA ( $\text{ICC}=0.79$ , 95%  $\text{CI}=0.70- 0.86$ ) and  
59  
60

1  
2  
3 285 leisure-time PA (ICC= 0.79, 95% CI= 0.69- 0.85) among participants that were employed  
4  
5 286 compared to their unemployed counterparts, it was higher for domestic PA (ICC=0.65, 95%  
6  
7 287 CI=0.43- 0.79) and sitting time (ICC= 0.68, 95% CI= 0.36- 0.83) among participants that were  
8  
9 288 unemployed than in the employed subgroup.

10 289  
11  
12 290 Figures 1, 2 and 3 (Bland-Altman plots) illustrate the agreement in the scores (minutes/week) of  
13  
14 291 total PA, MVPA and sitting between the first and second administrations of Hausa IPAQ-LF. For  
15  
16 292 total PA, the mean difference was 106.7 minutes/week, with a wide 95% limits of agreement (-  
17  
18 293 762.2 to 965.6 minutes/week). For MVPA, the mean difference was about one and half hour per  
19  
20 294 week (91.6 minutes/week), and also demonstrating wide 95% limits of agreement (-744.5 to  
21  
22 295 927.7 minutes/week). For sitting time, the mean difference was small (26 minutes/week) and the  
23  
24 296 95% limits of agreement range from -2178.1 to 2230.9 minutes/week.

25 297  
26 298 Table 4 shows the patterns of PA across sociodemographic subgroups during the first (IPAQ1)  
27  
28 299 and second (IPAQ2) administrations of the modified IPAQ-LF. Overall and across all stratified  
29  
30 300 variables, time spent in PA reported during the first administration tends to be higher than those  
31  
32 301 reported during the second administration. At both time points, men reported significantly  
33  
34 302 ( $p<0.05$ ) higher mean time (minute/week) in active transportation, occupational PA, and leisure-  
35  
36 303 time PA than women. However, women spent significantly ( $p<0.001$ ) more time (minutes/week)  
37  
38 304 in domestic PA than men (IPAQ1=236.9 vs 82.3, IPAQ2=195.5 vs 52.4). For educational status,  
39  
40 305 participants that had lower than secondary school education compared to those with at least  
41  
42 306 secondary school education reported statistically significant higher mean time (minutes/week) at  
43  
44 307 both time points for total PA, active transport, occupational PA, walking and vigorous intensity  
45  
46 308 activity compared to those with at least secondary school education. While participants that were  
47  
48 309 employed reported statistically significant ( $p<0.05$ ) more time (minutes/week) in total PA  
49  
50 310 (IPAQ1=441.1 vs 285.1, IPAQ2=359.4 vs 141.0), active transportation (IPAQ1=43.8 vs 21.1,  
51  
52 311 IPAQ2=36.9 vs 18.3) and work PA (IPAQ1=195.5 vs 41.8, IPAQ2=164.1 vs 40.1) than those  
53  
54 312 who were unemployed, the unemployed reported statistically significant ( $p<0.05$ ) higher time in  
55  
56 313 domestic activity (IPAQ1=210.6 vs 132.1, IPAQ2=205.0 vs 112.6) compared to the employed.

57  
58  
59  
60

### 315 **Construct Validity**

316 Overall, correlations between energy expenditure (MET-Minutes/week) according to the  
317 modified IPAQ-LF and anthropometric and biological measures were statistically significant in  
318 the expected direction for all domains and intensities of PA, except for occupation and active  
319 transport domains and walking (table 5). In the full sample, domestic PA was mainly related with  
320 SBP ( $\rho = -0.27$ ,  $p < 0.01$ ) and DBP ( $\rho = -0.17$ ,  $p < 0.05$ ), while leisure PA and total PA were only  
321 related with SBP ( $\rho = -0.16$ ,  $p < 0.05$ ) and BMI ( $\rho = -0.29$ ,  $p < 0.01$ ), respectively. Similarly,  
322 moderate-intensity PA was mainly related with SBP ( $\rho = -0.16$ ,  $p < 0.05$ ) and DBP ( $\rho = -0.21$ ,  $p <$   
323  $0.01$ ), but vigorous-intensity PA was only related with BMI ( $\rho = -0.11$ ,  $p < 0.05$ ). In the gender  
324 based analyses, total PA, domestic PA and sedentary time were more consistently related with  
325 anthropometric and biological variables. The strongest rho value ( $-0.41$ ) was found for the  
326 relationship between total PA and BMI for the male subgroup. The rho values of  $-0.23$  was  
327 reached between total PA and DBP for the women subgroup. Only in women was domestic PA  
328 significantly related with BMI ( $\rho = -0.23$ ), DBP ( $\rho = -0.20$ ) and SBP ( $\rho = -0.31$ ). Leisure-time  
329 PA ( $\rho = -0.39$ ) and occupational PA ( $\rho = -0.22$ ) were significantly related with BMI only in men.  
330 The rho value for the relationship between sitting time and BMI was slightly higher in women ( $\rho$   
331  $= 0.19$ ) than men ( $\rho = 0.15$ ).

332

### 333 **DISCUSSION**

334 This study examined the reliability and an aspect of validity of a modified version of the IPAQ-  
335 LF in Nigeria. The findings generally indicated acceptable test-retest reliability and modest  
336 construct validity for items of the modified IPAQ-LF among Nigerian adults. To the best of our  
337 knowledge, the present study is the only one to examine the reliability and validity of the long  
338 version of IPAQ that has been modified specifically to an indigenous African culture and  
339 language.

340

341 We found evidence for good reliability with high correlations between the test-retest for total  
342 PA, occupational PA, active transportation and vigorous intensity activity. Our results shows that  
343 except for domestic PA and sitting time, ICC values for domains of PA were consistently above  
344  $0.70$ , a level of reproducibility that has been considered acceptably good for IPAQ data.[33,34]

1  
2  
3 345 Similar to a previous IPAQ-LF study in Hong Kong,[34] domestic activity demonstrated the  
4  
5 346 lowest ICC value in our study. However, it is possible that the infrequent nature of household  
6  
7 347 activities undertaken, especially by men may account for the low reliability reported for domestic  
8  
9 348 PA in our study. In addition to the traditional African patriarchal norm that make most African  
10  
11 349 men to rarely engage in indoor household activities, men in the high socioeconomic group in  
12  
13 350 Nigeria may also not engage in outdoor domestic activities like gardening and outdoor home,  
14  
15 351 appliances and equipment maintenance because they are able to employ the services of domestic  
16  
17 352 helpers and repair men. Our findings of lower reliability for domestic activity among men, those  
18  
19 353 with more than secondary school education and those who were employed compared to their  
20  
21 354 counterparts seem to support this assumption.  
22

23 356 The highest and strongest reliability coefficients (0.82) were found for both active transportation  
24  
25 357 and vigorous intensity activity. Perhaps, active transportation was more stable, consistent and  
26  
27 358 reproducible overtime than other PA domains because it is a common and ubiquitous PA  
28  
29 359 behaviour in the African region. Mostly, the performance of active transportation especially  
30  
31 360 walking is often out of necessity rather than choice within the African context. Our finding of  
32  
33 361 higher ICC value for vigorous intensity PA is consistent with those of other studies that found  
34  
35 362 the reliability of vigorous intensity activity to be higher compared to that of moderate intensity  
36  
37 363 activity.[10,30,34,35] Compared to structured vigorous physical activities like sports and  
38  
39 364 exercise that can be more easily recalled, moderate intensity PA are often of low salience,  
40  
41 365 incidental and may not easily be remembered by people.[36,37] Further our finding that the  
42  
43 366 reliability of vigorous intensity physical activity was meaningfully higher among men than  
44  
45 367 women seem to confirm our previous findings with the IPAQ-SF.[21] Plausibly men in Nigeria  
46  
47 368 are more consistent than women when responding to PA items that pertained to intense vigorous  
48  
49 369 PA than other intensities of activity. Overall, the moderate to good evidence of reliability found  
50  
51 370 for all items indicate that the modified IPAQ-LF is reproducible, internally consistent and is  
52  
53 371 promising for research in Nigeria.  
54

55 372  
56  
57 373 Except for sitting time, the limits of agreement in the mean scores of total PA and MVPA  
58  
59 374 between the first and second administrations were wide, suggesting an evidence of bias between  
60

1  
2  
3 375 administrations. Large difference in PA scores between the 2 administrations would indicate that  
4  
5 376 at least one of the two measurements is not accurate. However, similar to the finding of a  
6  
7 377 Mexican study,[38] scores on the Hausa IPAQ-LF were consistently lower during the second  
8  
9 378 administration of the questionnaire compared to the first administration. Because familiarity with  
10  
11 379 the IPAQ questions may improve over multiple exposures to the questionnaire, it is possible that  
12  
13 380 participants in our study might have over-reported their PA levels during the first administration  
14  
15 381 of the Hausa IPAQ-LF. This kind of findings may have implication for the utility of IPAQ for  
16  
17 382 surveillance. Generally, due to issues of social desirability phenomenon and over reporting of PA  
18  
19 383 that has been associated with the IPAQ,[39,40] it may be necessary to start considering the need  
20  
21 384 for multiple measurements when using the IPAQ for evaluating PA, especially in developing  
22  
23 385 African countries. However, patterns of PA as measured by the modified IPAQ-LF during both  
24  
25 386 administrations were consistently similar, and both administrations were able to discriminate PA  
26  
27 387 in the expected direction between subgroups of our sample. For example, at both measurement  
28  
29 388 time points, and consistent with hypothesis, men reported more time in active transportation,  
30  
31 389 occupational PA and leisure PA than women, while women reported more time in domestic PA  
32  
33 390 and sedentary activity than men.  
34

35 391  
36  
37 392 In the absence of objective criterion standards for evaluating an absolute estimate of PA, the  
38  
39 393 consistency of items on IPAQ with variables known to be related to PA such as body mass index  
40  
41 394 (BMI), blood pressure, heart rate, indicators of lipid and glucose metabolism, and fitness index  
42  
43 395 have been used as important construct validity measures.[7,10,21,24] In the present study, the  
44  
45 396 correlations of the PA domains and intensities with biological and anthropometric variables were  
46  
47 397 mostly significant in the expected direction, but they were low suggesting a modest evidence of  
48  
49 398 construct validity for the modified IPAQ-LF in Nigeria. However, observed correlations were  
50  
51 399 comparable with the values in other studies that have evaluated the IPAQ-LF.[5,7,8,24,30,33,39]  
52  
53 400 Because better validity coefficients have been reported for other PA measures above that of the  
54  
55 401 IPAQ,[39,41] with the present African finding, it is possible that the IPAQ-LF only have modest  
56  
57 402 evidence of construct validity. However, our findings on the relationships between physical  
58  
59 403 activity and biological and anthropometric variables should be interpreted in the light of an  
60  
61 404 important caution. Because hypertensive and obese people may get oriented to exercise,[3] cross-

1  
2  
3 405 sectional associations of physical activity and blood pressure or BMI could also occur in the  
4  
5 406 opposite direction and may not represent much information as indicators of construct validity of  
6  
7 407 physical activity measures.  
8

9 408

### 10 409 **Strengths and limitations**

11  
12  
13 410 A strength of this study is the systematic adaptation and tailoring of items on the IPAQ-LF to  
14  
15 411 reflect the common PA behaviours of people in Nigeria. This is the first study in an African  
16  
17 412 country to explore the cultural adaptation and translation of the IPAQ-LF, and its findings  
18  
19 413 demonstrated the feasibility of using the IPAQ-LF to reliably collect PA data in a diverse  
20  
21 414 segment of the Nigerian population. In the Africa region, the importance of a valid and  
22  
23 415 established PA scale like the modified IPAQ-LF is not only important to monitoring the domain  
24  
25 416 in which activity is performed, but also very critical to understanding studies of ecological  
26  
27 417 models of health behaviours, that emphasize the importance of multiple levels of influence on  
28  
29 418 health behaviours including PA.[18,42] In Nigeria, emerging evidence from studies using  
30  
31 419 ecological models indicate that favourable built environmental attributes are promising for  
32  
33 420 improving total and moderate-to-vigorous PA and controlling obesity among adults.[26, 43-45]  
34  
35 421 However, built environment characteristics are expected to be strongly related to specific PA  
36  
37 422 types rather than overall PA.[46,47] For example, different environmental variables can be  
38  
39 423 related to walking for leisure or transportation and to moderate PA for household, occupation,  
40  
41 424 recreation or transportation. Thus, a study of adaptation of the IPAQ-LF is very important to  
42  
43 425 understanding the domain specific nature of ecological models research in the African region.  
44  
45 426 One additional strength was the exploration of PA patterns by gender, educational level and  
46  
47 427 employment status, the findings of which were consistent with general hypothesis on social  
48  
49 428 patterns of inactivity in low-income countries.[20,48]  
50

51 429

52  
53 430 However, the findings of this study should be interpreted in the light of some important  
54  
55 431 limitations. Direct comparison of our validity findings with previous studies should be made with  
56  
57 432 caution, because unlike in our study, the accelerometer or PA diary were utilized as a common  
58  
59 433 objective criterion standard to validate the IPAQ in the majority of the  
60  
61 434 studies.[5,7,8,24,30,33,39] Thus, examining the construct validity through the relationships of



1  
2  
3 435 PA with BMI and resting blood pressure was an important limitation of our study. The choice  
4  
5 436 and availability of appropriate criterion measures are particular issues of concern for the  
6  
7 437 validation of PA questionnaires in low-income countries of Africa [5,49,50]. Despite these  
8  
9 438 issues, the validity coefficients in our study were remarkably similar to those reported in other  
10  
11 439 studies, [5,7,8,24,30,33,39] and the consistency of items on IPAQ with variables known to be  
12  
13 440 related to PA such as BMI, blood pressure, heart rate, indicators of lipid and glucose metabolism,  
14  
15 441 and fitness index have previously been used as important construct validity  
16  
17 442 measures.[7,10,21,24] Another limitation of the study is the use of non-probability sampling  
18  
19 443 technique. The study finding may have limited generalizability to other samples of Nigerians that  
20  
21 444 have different characteristics from this sample. In addition, the majority of participants have  
22  
23 445 more than secondary school education with potentially higher comprehension and recall ability  
24  
25 446 than may be found in the general population. Nevertheless, recruitment from diverse  
26  
27 447 neighbourhoods and settings allowed for a sample with reasonable heterogeneity in age,  
28  
29 448 occupational status, and ethnic backgrounds and made it possible to stratify the analyses by  
30  
31 449 sociodemographic characteristics. However, because some of the participants in the present  
32  
33 450 study required assistance to complete the survey, interview administration rather than self-  
34  
35 451 administration of the IPAQ-LF should be encouraged in any future national studies in the  
36  
37 452 African region. **Administering the IPAQ through interview has been considered as a viable and  
38  
39 453 preferred option in developing countries.[5]**  
40  
41 454

## 455 **Conclusions**

456 Overall, the present study suggests that the modified IPAQ-LF demonstrated sufficient evidence  
457  
458 of test-retest reliability and may be valid for assessing context specific PA behaviours of adults  
459  
460 in Nigeria. Adaptation and criterion evaluation of the IPAQ-LF in other African countries could  
461  
462 further contribute to our understanding of the impact of multiple levels of influence on PA  
463  
464 behaviours of people in the African region.

1  
2  
3 465**Acknowledgments**

467 The authors are grateful to Mrs. Salamatu U Aliyu and Mr. Sa'adu Inusa Kiriri for their help  
468 with questionnaire translations, and to the participants for their help for taking part in the study.

469

**Contributors**

470  
471 ALO conceived and designed the study, contributed to cultural adaptation and acquisition of  
472 data, conducted the statistical analysis and interpretation of data and drafted the manuscript.  
473 UMB and STP managed participants' recruitment and data collection and contributed to cultural  
474 adaptation. HBN and RDM contributed to cultural adaptation and translations of the measure.  
475 AYO contributed to study design, acquisition of data and critically revised the manuscript for  
476 important intellectual contents. All authors read and approved the final manuscript.

477

**Funding**

478  
479 This research received no specific grant from any funding agency in the public, commercial or  
480 not-for-profit sectors.

481

**Competing interests**

482  
483 Authors declare there is no competing interest associated with this study.

484

**Ethics approval**

485  
486 Research and Ethic Committee of the University of Maiduguri Teaching Hospital, Nigeria  
487 (ADM/TH/EC/75).

488

**Data sharing process**

489  
490 Dataset for this study available upon request from the corresponding author.

491

492

493

494

495 **References**

496

497 1. Garber CE, Blissmer B, Deschenes MR, *et al.* for the American College of Sports Medicine.

498 Quantity and quality of exercise for developing and maintaining cardiorespiratory,

499 musculoskeletal, and neuromotor fitness in apparently healthy adults: guidance for

500 prescribing exercise. *Med Sci Sports Exerc* 2011;43:1334-1359.

501

502 2. World Health Organization. Global recommendations on physical activity for health. WHO,

503 Geneva, Switzerland; 2010.

504

505 3. Haskell WL, Lee I-M, Pate RP, *et al.* Physical activity and public health: updated

506 recommendation for adults from the American College of Sports Medicine and the American

507 Heart Association. *Circulation* 2007;116:1081-1093.

508

509 4. World Health Assembly 57.17. *Global strategy on diet and physical activity*. Geneva: World

510 Health Organization. May 2004.

511

512 5. Craig CL, Marshall, AL, Sjostrom M, *et al.* International physical activity questionnaire: 12513 country reliability and validity. *Med Sci Sports Exerc* 2003;35(8):1381-1395.

514

515 6. The IPAQ group. International physical activity questionnaire. 2014 Available at:

516 <http://www.ipaq.ki.se/scoring.pdf>. Accessed May 21, 2014.

517

518 7. Hagstromer M, Oja P, Sjostrom M. The international physical activity questionnaire (IPAQ)

519 a study of concurrent and construct validity. *Public Health Nutr* 2006;9:755-762.

520

521 8. Hagstromer M, Ainsworth BE, Oja P, *et al.* Comparison of a subjective and an objective522 measure of physical activity in a population sample. *J Phys Act Health* 2010;7:541-550.

523

524 9. Maddison R, Mhurchu CN, Jiang Y, *et al.* International physical activity questionnaire

525 (IPAQ) and New Zealand physical activity questionnaire (NZPAP): A doubly labelled water

526 validation. *Int J Behav Nutr Phys Act* 2007;4:62.

527

528 10. Kurtze N, Rangun V, Hustveldt B. Reliability and validity of the international physical

529 activity questionnaire in the Nord-Trondelag Health Study (HUNT) population of men. *BMC*530 *Med Res Methodol* 2008;8:63.

531

532 11. Nicaise V, Marshall S, Ainsworth BE. Domain-specific physical activity and self-report bias

533 among low-income Latinas living in San Diego county. *J Phys Act Health* 2011;8:881-890.

534

535 12. Vandelanotte C, De Bourdeaudunij I, Philippaerts R, *et al.* Reliability and validity of a

536 computerized and Dutch version of the International Physical Activity Questionnaire (IPAQ).

537 *J Phys Act Health* 2005;2;63-75.

538

- 1  
2  
3 538  
4 539 13. Loney T, Standage M, Thompson D, *et al.* Self-Report vs. objectively assessed physical  
5 540 activity: which is right for public health? *J Phys Act Health* 2011;8:62-70.  
6 541  
7 542 14. Mackay LM, Oliver M, Schofield GM. Demographic variations in discrepancies between  
8 543 objective and subjective measures of physical activity. *Open Journal of Preventive Medicine*  
9 544 2011;1:13-19.  
10 545  
11 546 15. Kolbe-Alexander TL, Lambert EV, Harkins JB *et al.* Comparison of two methods of  
12 547 measuring physical activity in South African older adults. *J Aging Phys Act* 2006;14:98-114.  
13 548  
14 549 16. Pratt M, Sarmiento OL, Montes F, *et al.* The implications of megatrends in information and  
15 550 communication technology and transportation for changes in global physical activity. *Lancet*  
16 551 2012;380:282-293.  
17 552  
18 553 17. Kohl 3<sup>rd</sup> HW, Criag CL, Lambert EV, *et al.* for the Lancet physical activity series working  
19 554 group. The pandemic of physical inactivity: global action for public health. *Lancet*  
20 555 2012;380:294-305.  
21 556  
22 557 18. Bauman AE, Reis RS, Sallis JF, *et al.* Correlates of physical activity: why are some physical  
23 558 active and others not? *Lancet* 2012;380:258-271.  
24 559  
25 560 19. Heath GW, Parra DC, Sarmiento OL, *et al.* Evidence-based intervention in physical activity:  
26 561 lessons from around the world. *Lancet* 2012;380:278-281.  
27 562  
28 563 20. Hallal PC, Andersen LB, Bull FC, *et al.* for the Lancet physical activity series working  
29 564 group. Global physical activity levels: surveillance progress, pitfalls, and prospects. *Lancet*  
30 565 2012;380:247-257.  
31 566  
32 567 21. Oyeyemi AL, Oyeyemi AY, Adegoke BOA, *et al.* Cross-cultural adaptation of the  
33 568 international physical activity questionnaire: reliability and validity of the Hausa version in  
34 569 Nigeria. *BMC Med Res Methodol* 2011;11:156.  
35 570  
36 571 22. Chu AH, Moy FM. Reliability and validity of the Malay international physical activity  
37 572 questionnaire (IPAQ-M) among a Malay population in Malaysia. *Asia Pac J Public Health*  
38 573 2013 Apr 17 [Epub ahead of print].  
39 574  
40 575 23. Chun MY. Validity and reliability of Korean version of international physical activity  
41 576 questionnaire short form in the elderly. *Korean J Fam Med* 2012;33:144-151.  
42 577  
43 578 24. Graff-Iversen S, Anderssen SA, Holme IM, *et al.* An adapted version of the long  
44 579 international physical activity questionnaire (IPAQ L): Construct validity in a low income,  
45 580 multiethnic population study from Oslo, Norway. *Int J Behav Nutr Phys Act* 2007;4:13.  
46 581  
47  
48  
49  
50  
51  
52  
53  
54  
55  
56  
57  
58  
59  
60

- 1  
2  
3 582 25. Lee IM, Shiroma EJ, Lobelo F, *et al.* for the Lancet physical activity series working group  
4 583 Effect of physical inactivity on major non-communicable diseases worldwide: an analysis of  
5 584 burden of diseases and life expectancy. *Lancet* 2012;380:219-229.  
6 585  
7  
8 586 26. Oyeyemi AL, Sallis JF, Deforche B, *et al.* Evaluation of the Neighborhood Environment  
9 587 Walkability Scale in Nigeria. *Int J Health Geogr* 2013;12:16.  
10 588  
11 589 27. National Bureau of Statistics. Statistical fact sheet and population census. Federal Republic  
12 590 of Nigeria 2008. Available: <http://www.nigerianstat.gov.ng> Accessed 28 August 2012.  
13 591  
14 592 28. National Population Commission (NPC) [Nigeria] and ORC Macro (2004) Nigeria  
15 593 Demographics and Health Survey 2003. Calverton, Maryland: National Population  
16 594 Commission and ORC Macro  
17 595  
18 596 29. World Health Organization. Obesity: Preventing and Managing the Global Epidemic. WHO  
19 597 Technical Report Series 894. 2000. World Health Organization; 2000. Available:  
20 598 [http://whqlibdoc.who.int/trs/WHO\\_TRS\\_894.pdf](http://whqlibdoc.who.int/trs/WHO_TRS_894.pdf) Accessed 23 August 2013.  
21 599  
22 600 30. Vasheghani-Farahani A, Tahmusbi M, Sheri H, *et al.* The Persian, last 7-day, long form of  
23 601 the International Physical Activity Questionnaire: Translation and validation study. *Asian J*  
24 602 *Sports Med* 2011;2(2)106-116.  
25 603  
26 604 31. Portney L, White M. Foundations of clinical research. Applications to practice. New Jersey:  
27 605 Pearson Education Inc, 2009  
28 606  
29 607 32. Bland JM, Altman DG. Statistical methods for assessing agreement between two methods of  
30 608 clinical measurement. *Lancet*, 1986;1:307-310.  
31 609  
32 610 33. Levy SS, Readdy RT. Reliability of the international physical activity questionnaire in  
33 611 research setting: last 7-day self-administered long form. *Meas Phys Educ Exerc Sci*  
34 612 2009;13:191-205.  
35 613  
36 614 34. Macfarlane D, Chan A, Cerin E. Examining the validity and reliability of the Chinese version  
37 615 of the International Physical Activity Questionnaire, long form (IPAQ-LC). *Public Health*  
38 616 *Nutr* 2010;14(3),443-450.  
39 617  
40 618 35. Papathanasiou G, Georgoudis G, Papandreou M, *et al.* Reliability measures of the short  
41 619 international physical activity questionnaire (IPAQ) in Greek young adults. *Hellenic J*  
42 620 *Cardiol* 2009;50:283-294.  
43 621  
44 622 36. Sallis JF, Saelens BE. Assessment of physical activity by self-report: status, limitations, and  
45 623 future directions. *Res Q Exerc Sport* 2000;71:1-14.  
46 624  
47 625 37. Washburn RA, Heath GW, Jackson AW. Reliability and validity issues concerning large-  
48 626 scale surveillance of physical activity. *Res Q Exerc Sport* 2000;71:104-113.

- 1  
2  
3 627  
4 628 38. Medina C, Barquera S, Janssen I. Validity and reliability of the International Physical  
5 629 Activity Questionnaire among adults in Mexico. *Rev panam salud publica* 2013;34(1):21-28.  
6 630  
7 631 39. Johnson-Kozlow M, Sallis JF, Gilpin EA, *et al.* Comparative validation of the IPAQ and the  
8 632 7-Day PAR among women diagnosed with breast cancer. *Int J Behav Nutr Phys Act*  
9 633 2006;3:7.  
10 634  
11 635 40. Rzewnicki R, Vanden Auweele Y, De Bourdeaudhuij I. Addressing over-reporting on the  
12 636 International Physical Activity Questionnaire (IPAQ) telephone survey with a population  
13 637 sample. *Public Health Nutr* 2003;6:299–305.  
14 638  
15 639 41. Aishworth BE, Macera CA, Jones DA *et al.* Comparison of the 2001 BRFSS and the IPAQ  
16 640 physical activity questionnaire. *Med Sci Sports Exerc* 2006;38(9):1584-1592.  
17 641  
18 642 42. Sallis JF, Owen N, Fisher EB. Ecological models of health behavior. In: Glanz K, Rimer BK,  
19 643 Viswanath K, eds. *Health Behavior and Health Education: Theory, Research, and Practice*,  
20 644 4<sup>th</sup> edn. San Francisco: Jossey-Bass 2008, 465-486  
21 645  
22 646 43. Oyeyemi AL, Adegoke BOA, Oyeyemi AY, *et al.* Perceived environmental correlates of  
23 647 physical activity and walking in African young adults. *Am J Health Promot* 2011;25 (5):e10-  
24 648 e19  
25 649  
26 650 44. Oyeyemi AL, Adegoke BOA, Oyeyemi AY, *et al.* Environmental factors associated with  
27 651 overweight among adults in Nigeria. *Int J Behav Nutr Phys Act* 2012, 9:32  
28 652  
29 653 45. Oyeyemi AL, Sallis JF, Adegoke BOA, *et al.* Perception of neighborhood safety is related  
30 654 with physical activity among adults in Nigeria. *BMC Public Health* 2012, 12:294  
31 655  
32 656 46. Giles-Corti B, Timperio A, Bull F, *et al.* Understanding physical activity environmental  
33 657 correlates: increased specificity for ecological models. *Exerc Sports Sci Rev.* 2005; 33  
34 658 (4):175-181.  
35 659  
36 660 47. Sallis JF, Cervero R, Ascher WW, *et al.* An ecological approach to creating active living  
37 661 communities. *Annu Rev Public Health* 2006;27:14.1-14.26  
38 662  
39 663 48. Dumith SC, Hallal PC, Reis RS, Kohl HW 3<sup>rd</sup>. Worldwide prevalence of physical and its  
40 664 association with human development index in 76 countries. *Prev Med* 2011;50:24-28  
41 665  
42 666 49. Oyeyemi AL, Umar M, Ugoche F, *et al.* Accelerometer-determined physical activity and its  
43 667 comparison with the International Physical Activity Questionnaire in a sample of Nigerian adults.  
44 668 *PLoS One*, 2014; 9 (1): e872333  
45 669  
46 670 50. Sobnqwi E, Mbanya JCN, Urwin NC, *et al.* Development and validation of a questionnaire  
47 671 for the assessment of physical activity in epidemiological studies in Sub-Saharan Africa. *Int J*  
48 672 *Epidemiol* 2001;30:1361-1368.

Table 1. Descriptive characteristics of the participants (N=180)

| Variables                          | Total sample<br>(N=180) | Men<br>(n=90, 50%) | Women<br>(n=90, 50%) |
|------------------------------------|-------------------------|--------------------|----------------------|
| <b>Age (years)</b>                 |                         |                    |                      |
| Mean ( $\pm$ SD)                   | 35.6 $\pm$ 10.3         | 35.7 $\pm$ 8.3     | 35.5 $\pm$ 11.9      |
| <b>Marital status (n, %)*</b>      |                         |                    |                      |
| Not Married                        | 74(41.1)                | 48(53.3)           | 26(28.9)             |
| Married                            | 106(58.9)               | 42(46.7)           | 64(71.1)             |
| <b>BMI (Kg/m<sup>2</sup>)</b>      |                         |                    |                      |
| Mean ( $\pm$ SD)                   | 23.8 $\pm$ 3.9          | 23.8 $\pm$ 3.5     | 23.8 $\pm$ 4.4       |
| <b>BMI Category (n, %)</b>         |                         |                    |                      |
| Underweight                        | 14 (7.8)                | 4 (4.4)            | 10 (11.1)            |
| Normal weight                      | 107 (59.4)              | 58 (64.4)          | 49 (54.4)            |
| Overweight/obese                   | 59 (32.8)               | 28 (31.2)          | 31 (34.5)            |
| <b>Ethnicity (n, %)</b>            |                         |                    |                      |
| Hausa/Fulani                       | 21(11.7)                | 10.1(11.1)         | 11(12.2)             |
| Igbo                               | 8(4.4)                  | 5(5.6)             | 3(3.3)               |
| Yoruba                             | 10(5.6)                 | 6(6.7)             | 4(4.4)               |
| Kanuri/Shuwa Arab                  | 44(24.4)                | 23(25.6)           | 21(23.3)             |
| Others                             | 97(53.9)                | 46 (51.1)          | 51(56.7)             |
| <b>Educational level (n, %)*</b>   |                         |                    |                      |
| > Secondary School                 | 111 (62.7)              | 11 (12.2)          | 17(19.5)             |
| Secondary                          | 38 (21.5)               | 10 (11.1)          | 28(32.5)             |
| <Secondary School                  | 28 (15.8)               | 69 (76.7)          | 42(48.2)             |
| <b>Occupational Status (n, %)*</b> |                         |                    |                      |
| Unemployed                         | 63(35)                  | 16(17.8)           | 47(52.2)             |
| Blue Collar                        | 45(25)                  | 28(31.1)           | 17(18.9)             |
| White Collar                       | 72(40)                  | 46(51.1)           | 26(28.9)             |

\*- Significant difference between samples ( $p < 0.05$ )

BMI- Body Mass Index

Table 2: Test-reliability based on intra-class correlation coefficient for Hausa IPAQ– LF, overall and by gender

| PA Measure (MET×min/wk)             | Total (N=180)      |                    |                  | Women (n=90)     | Men (n=90)         |
|-------------------------------------|--------------------|--------------------|------------------|------------------|--------------------|
|                                     | Test 1 (Mean (SD)) | Test 2 (Mean (SD)) | ICC (95%CI)      | ICC (95%CI)      | ICC (95%CI)        |
| Total PA, all domain                | 2160.6 (2691.1)    | 1612.8 (1612.8)    | 0.76 (0.65-0.82) | 0.45 (0.08-0.67) | 0.80 (0.69- 0.87)  |
| Occupation                          | 619.1(1671.5)      | 497.5 (1332.9)     | 0.77 (0.68-0.82) | 0.64 (0.46-0.77) | 0.78 (0.66 -0.85)  |
| Active Transport                    | 468.1 (684.7)      | 440.5 (605.7)      | 0.82 (0.75-0.87) | 0.63 (0.40-0.77) | 0.83 (0.73 - 0.89) |
| Domestic                            | 597.6 (754.6)      | 473.4 (673.7)      | 0.50 (0.32-0.62) | 0.38 (0.01-0.57) | 0.33 (-0.01-0.56)  |
| Leisure                             | 377.0 (1096.3)     | 196.7 (920.2)      | 0.71 (0.60-0.78) | 0.69 (0.53-0.79) | 0.75 (0.63-0.84)   |
| Sitting                             | 2263.0 (715.8)     | 2235.4 (818.9)     | 0.62 (0.42-0.75) | 0.71 (0.46-0.85) | 0.48 (0.06-0.72)   |
| <b>PA by Intensity (MET×min/wk)</b> |                    |                    |                  |                  |                    |
| Walking                             | 613.6 (635.6)      | 534.6 (449.1)      | 0.63 (0.48-0.74) | 0.57 (0.29-0.74) | 0.65 (0.44-0.78)   |
| Moderate                            | 986.9 (1365.9)     | 716.1 (1164.6)     | 0.61 (0.46-0.71) | 0.42 (0.11-0.62) | 0.67 (0.49-0.78)   |
| Vigorous                            | 526.5 (1543.7)     | 394.1 (1431.1)     | 0.82 (0.76-0.87) | 0.55 (0.30-0.71) | 0.86 (0.78-0.91)   |

PA= Physical Activity

MET= Metabolic Energy Turnover



Table 3: Socioeconomic status differences in test- retest reliability of the Hausa IPAQ- LF (N= 180)

| Socioeconomic Status               | Overall PA        | Active Transport  | Occupation PA     | Leisure PA        | Domestic PA      | Sitting           |
|------------------------------------|-------------------|-------------------|-------------------|-------------------|------------------|-------------------|
| <b>Educational Qualification</b>   |                   |                   |                   |                   |                  |                   |
| More than secondary school (n=111) | 0.42 (0.08-0.63)  | 0.67 (0.43-0.78)  | 0.32 (-0.06-0.57) | 0.33 (-0.05-0.57) | 0.58 (0.35-0.73) | 0.23 (-0.63-0.63) |
| Secondary School (n=38)            | 0.55 (0.22-0.74)  | 0.28 (-0.21-0.57) | 0.58 (0.33-0.74)  | 0.54 (0.25-0.71)  | 0.50 (0.19-0.69) | 0.51 (-0.04-0.76) |
| Less than Secondary school (n=28)  | 0.89 (0.67-0.96)  | 0.90 (0.74-0.96)  | 0.82 (0.61-0.92)  | 0.92 (0.83-0.96)  | 0.90 (0.78-0.95) | 0.77 (0.45-0.90)  |
| <b>Employment Category</b>         |                   |                   |                   |                   |                  |                   |
| Employed (117)                     | 0.80 (0.67-0.96)  | 0.83 (0.74-0.88)  | 0.79 (0.70-0.86)  | 0.79 (0.69-0.85)  | 0.36 (0.08-0.56) | 0.56 (0.23-0.75)  |
| Unemployed (63)                    | 0.09 (-8.86-0.56) | 0.68 (0.44-0.82)  | 0.16 (-0.39-0.49) | 0.25 (-0.24-0.55) | 0.65 (0.43-0.79) | 0.68 (0.36-0.80)  |

PA= Physical Activity

Table 4: Differences in time spent in physical activity overall, and by gender and socioeconomic status sub groups

|                                 | Gender             |                  |                    | Education               |                        |                         | Employment            |                         |
|---------------------------------|--------------------|------------------|--------------------|-------------------------|------------------------|-------------------------|-----------------------|-------------------------|
|                                 | Total<br>Mean ± SD | Men<br>Mean ± SD | Women<br>Mean ± SD | >Secondary<br>Mean ± SD | Secondary<br>Mean ± SD | <Secondary<br>Mean ± SD | Employed<br>Mean ± SD | Unemployed<br>Mean ± SD |
| <b>PA by domain (min/wk)</b>    |                    |                  |                    |                         |                        |                         |                       |                         |
| Total PA, all domain            |                    |                  |                    |                         |                        |                         |                       |                         |
| IPAQ1                           | 405.2 (507.8)      | 460.7 (582.9)    | 326.8 (367.8)      | 334.0 (400.8)           | 384.8 (514.8)          | 849.2 (764.1)**         | 441.1 (530.2)         | 285.1 (408.6)*          |
| IPAQ2                           | 308.4 (440.3)      | 319.7 (522.8)    | 291.9 (282.9)      | 285.1 (295.1)           | 184.8 (264.4)          | 803.0 (929.6)**         | 359.4 (481.6)         | 141.0 (185.2)*          |
| Active Transport                |                    |                  |                    |                         |                        |                         |                       |                         |
| IPAQ1                           | 35.8 (89.7)        | 52.4 (127.7)     | 19.5 (17.7)*       | 28.3 (47.7)             | 28.9 (45.02)           | 76.4 (198.7)*           | 43.8 (109.4)          | 21.1 (21.9)*            |
| IPAQ2                           | 30.4 (76.7)        | 41.2 (106.3)     | 19.3 (17.5)*       | 23.6 (30.6)             | 20.3 (30.9)            | 74.3 (182.6)*           | 36.9 (94.1)           | 18.3 (14.7)*            |
| Work                            |                    |                  |                    |                         |                        |                         |                       |                         |
| IPAQ1                           | 160.1 (380.8)      | 217.5 (466.8)    | 79.1 (179.9)*      | 114.8 (291.0)           | 122.9 (365.6)          | 546.7 (615.7)**         | 195.5 (418.8)         | 41.8 (162.2)*           |
| IPAQ2                           | 135.3 (310.3)      | 172.5 (372.8)    | 80.6 (171.9)*      | 104.1 (232.2)           | 160.9 (196.1)          | 531.6 (595.8)**         | 164.1 (341.7)         | 40.1 (133.0)*           |
| Domestic                        |                    |                  |                    |                         |                        |                         |                       |                         |
| IPAQ1                           | 159.6 (202.2)      | 82.3 (120.6)     | 236.9 (235.8)**    | 141.2 (182.4)           | 173.3 (238.5)          | 165.4 (159.4)           | 132.1 (170.7)         | 210.6 (243.8)*          |
| IPAQ2                           | 123.9 (163.9)      | 52.4 (74.9)      | 195.5 (190.1)**    | 131.9 (182.5)           | 107.6 (130.4)          | 147.3 (189.1)           | 112.6 (163.9)         | 205.0 (163.3)*          |
| Leisure                         |                    |                  |                    |                         |                        |                         |                       |                         |
| IPAQ1                           | 62.4 (159.1)       | 75.0 (211.1)     | 10.5 (27.3)**      | 47.0 (97.3)             | 92.7 (209.4)           | 38.2 (160.1)            | 69.7 (157.6)          | 48.7 (162.3)            |
| IPAQ2                           | 30.5 (118.2)       | 50.6 (160.7)     | 10.1 (38.5)**      | 23.4 (51.4)             | 24.7 (91.4)            | 71.5 (256.5)            | 43.1 (143.5)          | 17.0 (28.7)*            |
| Sitting                         |                    |                  |                    |                         |                        |                         |                       |                         |
| IPAQ1                           | 2263.0 (715.8)     | 2188.8 (759.7)   | 2330.7 (674.8)     | 2280.0 (618.7)          | 2433.9 (693.7)         | 2180.9 (760.8)          | 2159.4 (775.9)        | 2337.6 (667.2)          |
| IPAQ2                           | 2235.4 (819.9)     | 2208.7 (916.9)   | 2259.6 (728.1)     | 2420.7 (638.7)          | 2215.3 (663.1)         | 2160.0 (1111.4)         | 2170.6 (870.5)        | 2282.0 (785.5)          |
| <b>PA by Intensity (min/wk)</b> |                    |                  |                    |                         |                        |                         |                       |                         |
| Walking                         |                    |                  |                    |                         |                        |                         |                       |                         |
| IPAQ1                           | 178.5 (221.5)      | 241.1 (271.9)    | 128.2 (100.8)*     | 194.4 (268.1)           | 133.4 (85.6)           | 266.9 (285.4)*          | 192.0 (245.7)         | 133.3 (96.2)*           |
| IPAQ2                           | 142.5 (141.8)      | 148.5 (137.9)    | 133.7 (147.9)      | 151.7 (138.4)           | 103.6(94.7)            | 200.3 (209.1)*          | 150.7 (146.6)         | 115.4 (122.7)           |
| Moderate                        |                    |                  |                    |                         |                        |                         |                       |                         |
| IPAQ1                           | 201.9 (326.9)      | 193.0 (214.5)    | 214.5 (247.8)      | 187.3 (266.5)           | 194.9 (386.5)          | 309.7 (381.7)           | 221.2 (347.4)         | 137.7 (239.9)           |
| IPAQ2                           | 133.9 (238.5)      | 114.2 (276.9)    | 162.7 (165.6)      | 132.9 (177.8)           | 88.0 (197.2)           | 319.0 (482.1)*          | 153.9 (266.2)         | 68.0 (76.4)*            |
| Vigorous                        |                    |                  |                    |                         |                        |                         |                       |                         |
| IPAQ1                           | 94.1 (211.8)       | 123.7 (249.6)    | 52.2 (133.2)*      | 32.9 (81.9)             | 129.5 (208.2)          | 268.0 (459.7)**         | 90.2 (214.6)          | 127.1 (204.6)           |
| IPAQ2                           | 78.4 (206.9)       | 86.8 (227.4)     | 46.2 (73.4)        | 52.2 (140.2)            | 55.2 (127.0)           | 292.8 (461.5)**         | 92.8 (226.9)          | 130.9 (107.8)           |

1 PA= Physical Activity  
2 \*=p<0.05  
3 \*\*=p<0.001  
4  
5  
6  
7  
8  
9

For peer review only

10  
11  
12  
13  
14  
15  
16  
17  
18  
19  
20  
21  
22  
23  
24  
25  
26  
27  
28  
29  
30  
31  
32  
33  
34  
35  
36  
37  
38  
39  
40  
41  
42  
43  
44  
45  
46  
47  
48  
49

Table 5: Construct validity of Hausa IPAQ-LF: Spearman correlations between energy expenditure (MET×min/wk) from Hausa IPAQ– LF, and anthropometric and biological variables (N=180)

|                     | Overall (N = 180) |        |         | Female (n = 90) |         |         | Male (n = 90) |         |       |
|---------------------|-------------------|--------|---------|-----------------|---------|---------|---------------|---------|-------|
| MET×min/wk          | BMI               | DBP    | SBP     | BMI             | DBP     | SBP     | BMI           | DBP     | SBP   |
| <b>PA Domains</b>   |                   |        |         |                 |         |         |               |         |       |
| Total PA            | -0.29**           | -0.17* | -0.09   | -0.09           | -0.23** | -0.04   | -0.41**       | -0.08   | -0.14 |
| Occupation PA       | -0.12             | -0.09  | 0.01    | 0.02            | 0.02    | -0.05   | -0.22**       | -0.17   | -0.08 |
| Active transport PA | -0.05             | -0.04  | -0.01   | -0.10           | -0.13   | -0.02   | -0.04         | -0.02   | -0.80 |
| Domestic PA         | -0.07             | -0.17* | -0.26** | -0.23**         | -0.20*  | -0.31** | 0.04          | -0.14   | -0.04 |
| Leisure PA          | 0.09              | -0.08  | -0.16*  | -0.11           | 0.02    | 0.08    | -0.39**       | -0.12   | -0.06 |
| Sitting             | 0.16              | -0.09  | 0.04    | 0.19            | 0.12    | 0.05    | 0.15          | -0.09   | 0.05  |
| <b>PA Intensity</b> |                   |        |         |                 |         |         |               |         |       |
| Walking             | 0.90              | -0.09  | -0.03   | 0.19            | -0.05   | 0.08    | -0.05         | -0.11   | -0.15 |
| Moderate            | -0.02             | 0.21*  | 0.16*   | 0.02            | -0.14   | -0.08   | 0.02          | -0.25** | -0.16 |
| Vigorous            | -0.11*            | -0.06  | 0.03    | -0.16           | 0.01    | 0.02    | -0.13*        | -0.12   | -0.11 |

MET= Metabolic Energy Turnover

BMI= Body Mass Index

DBP= Diastolic Blood Pressure

SBP= Systolic Blood Pressure

PA= Physical activity

\*=p<0.05,

\*\*=p<0.01

1  
2  
3  
4  
5  
6  
7  
8  
9  
10  
11  
12  
13  
14  
15  
16  
17  
18  
19  
20  
21  
22  
23  
24  
25  
26  
27  
28  
29  
30  
31  
32  
33  
34  
35  
36  
37  
38  
39  
40  
41  
42  
43  
44  
45  
46  
47  
48  
49  
50  
51  
52  
53  
54  
55  
56  
57  
58  
59  
60

For peer review only

1  
2  
3  
4  
5  
6  
7  
8  
9  
10  
11  
12  
13  
14  
15  
16  
17  
18  
19  
20  
21  
22  
23  
24  
25  
26  
27  
28  
29  
30  
31  
32  
33  
34  
35  
36  
37  
38  
39  
40  
41  
42  
43  
44  
45  
46  
47  
48  
49  
50  
51  
52  
53  
54  
55  
56  
57  
58  
59  
60



Figure 1: Bland-Altman plot min/wk reported in total physical activity (PA) for the first and second administrations of Hausa IPAQ-LF. Mean difference: 106.7 +/- 2SD (Standard deviation) = -762.2 to 965.6

238x265mm (300 x 300 DPI)



Figure 2: Bland-Altman plot for min/wk reported in moderate-to-vigorous physical activity (MVPA) for the first and second administrations of Hausa IPAQ-LF: Mean difference: 91.6 +/- 2SD (Standard Deviation)=-744.5 to 927

239x287mm (300 x 300 DPI)

1  
2  
3  
4  
5  
6  
7  
8  
9  
10  
11  
12  
13  
14  
15  
16  
17  
18  
19  
20  
21  
22  
23  
24  
25  
26  
27  
28  
29  
30  
31  
32  
33  
34  
35  
36  
37  
38  
39  
40  
41  
42  
43  
44  
45  
46  
47  
48  
49  
50  
51  
52  
53  
54  
55  
56  
57  
58  
59  
60



Figure 3: Bland-Altman plot min/wk reported in sitting for the first and second administration of Hausa IPAQ-LF. Mean difference: 26.4  $\pm$  2SD (Standard Deviation) = -2178.1 to 2230.9

236x259mm (300 x 300 DPI)



Supplement: bmjopen-2014-005820.draft_revisions.pdf [file bmjopen-2014-005820.draft_revisions.pdf]
